# Supplementary material for: Triazole derivatives of guttiferone-A inhibit the proliferation of HepG2 cells by modulating MAPK/ERK signaling and expression profiles of regulators of G1/S transition
Source: Royal Society of Chemistry journal article supplement (doi:10.1039/d3nj02643d), 2023-01-01
Supplement: d3nj02643d1.pdf [file d3nj02643d1.pdf]

## Supplementary material

### **Triazole derivative of guttiferone-A inhibits the proliferation of HepG2 cells by modulating MAPK/ERK signaling and expression profiles of regulators of G1/S transition**

*Dayana A. Rodrigues<sup>a,1</sup>, Bianca L. de Sousa<sup>a,1</sup>, Carolina Giroto Pressete<sup>b,1</sup>, Júnio G. da Silva<sup>c</sup>, Bruno Zavan<sup>b</sup>, Ester Siqueira Caixeta<sup>b</sup>, Antônio Jacinto Demuner<sup>a</sup>, Eduardo J. Pilau<sup>d</sup>, Evandro Silva<sup>d</sup>, Marisa Ionta<sup>b\*</sup> and Marcelo H. dos Santos<sup>a\*</sup>.*

<sup>a</sup> *Departamento de Química, Universidade Federal de Viçosa, Avenida Peter Henry Rolfs, s/n, Campus Universitário, 36570-900 Viçosa-MG, Brazil.*

<sup>b</sup> *Instituto de Ciências Biomédicas, Universidade Federal de Alfenas, Rua Gabriel Monteiro da Silva, 700, 37130-000, Alfenas-MG, Brazil.*

<sup>c</sup> *Departamento de Química, Universidade Federal de Minas Gerais, Av. Antônio Carlos, 6627, Pampulha, 31270-901, Belo Horizonte-MG, Brazil.*

<sup>d</sup> *Departamento de Química, Universidade Estadual de Maringá, Avenida Colombo, 5790, Campus Universitário, 87020-900, Maringá-PR, Brazil.*

<sup>1</sup>These authors contributed equally to this work.

Corresponding authors

\*Marisa Ionta ([marisa.ionta@unifal-mg.edu.br](mailto:marisa.ionta@unifal-mg.edu.br))

*Rua Gabriel Monteiro da Silva, 700, zip code 37130-000, Alfenas-MG, Brazil.*

*Telephone number 55-35-3701-9582*

*\*\*Marcelo Henrique dos Santos ([marceloh.santos@ufv.br](mailto:marceloh.santos@ufv.br))*

*Avenida Peter Henry Rolfs, s/n, Zip code 36570-900, Viçosa-MG, Brazil..*

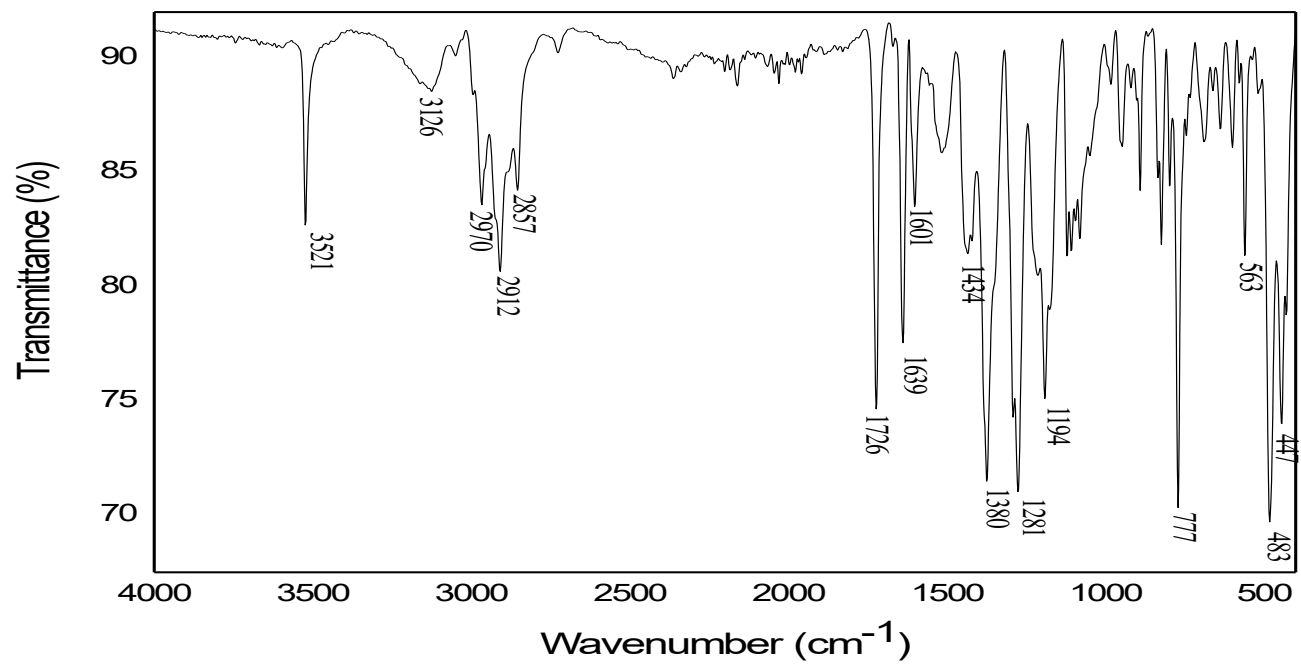

**Fig. S1.** FTIR (ATR) spectrum of guttiferone-A.

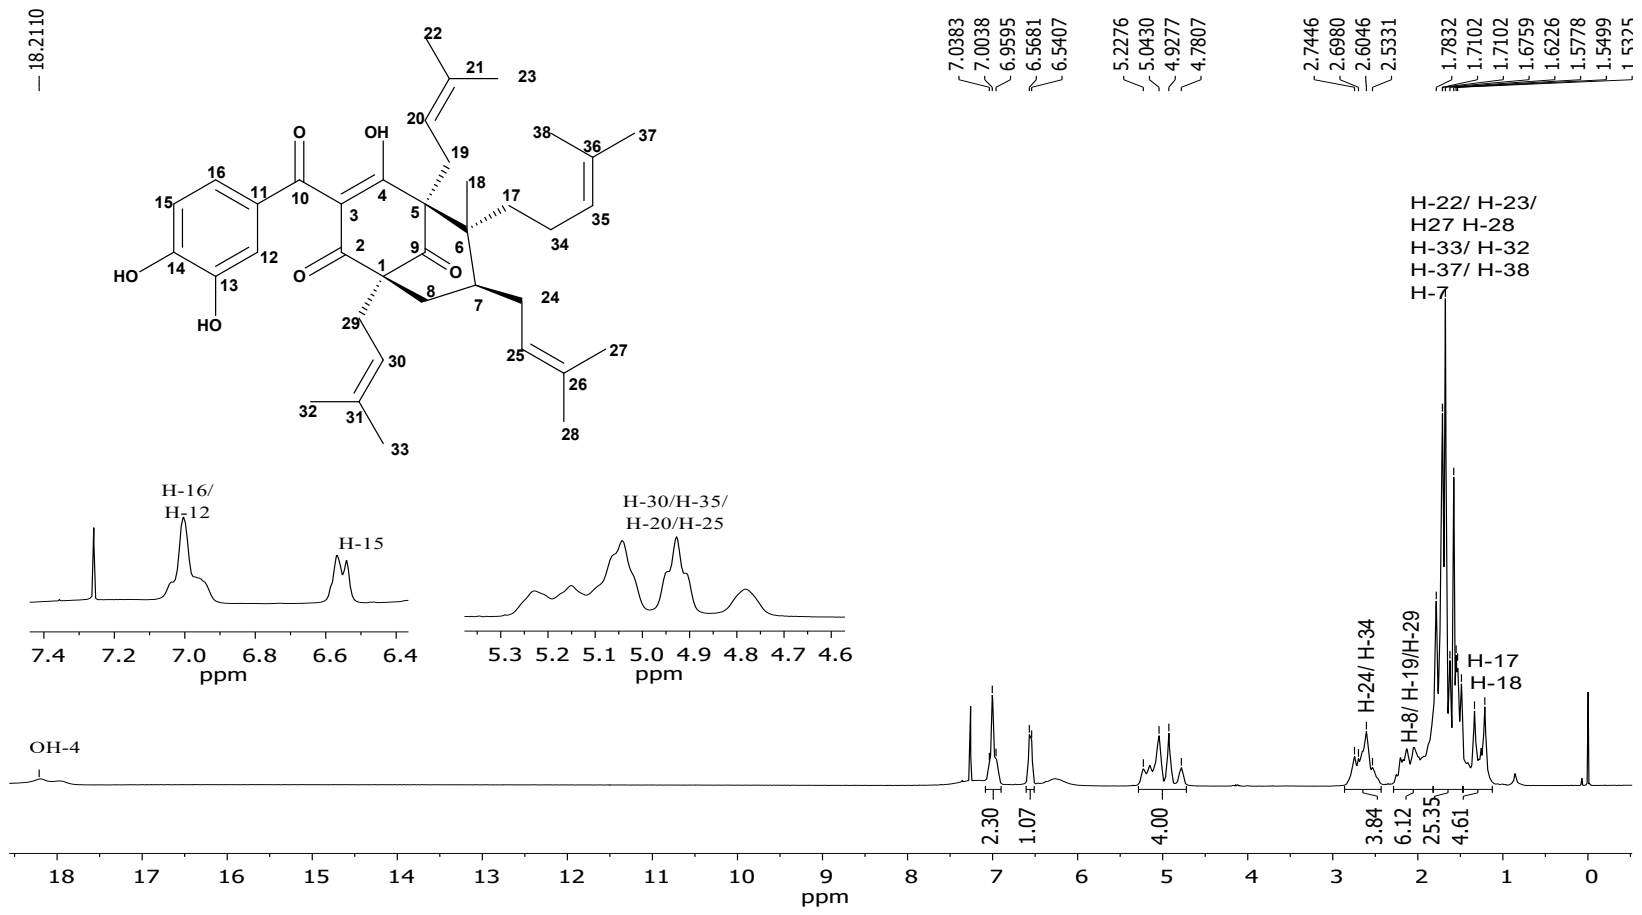

**Fig. S2.**  $^1\text{H}$  NMR spectrum (300 MHz,  $\text{CDCl}_3$ ) of guttiferone-A.

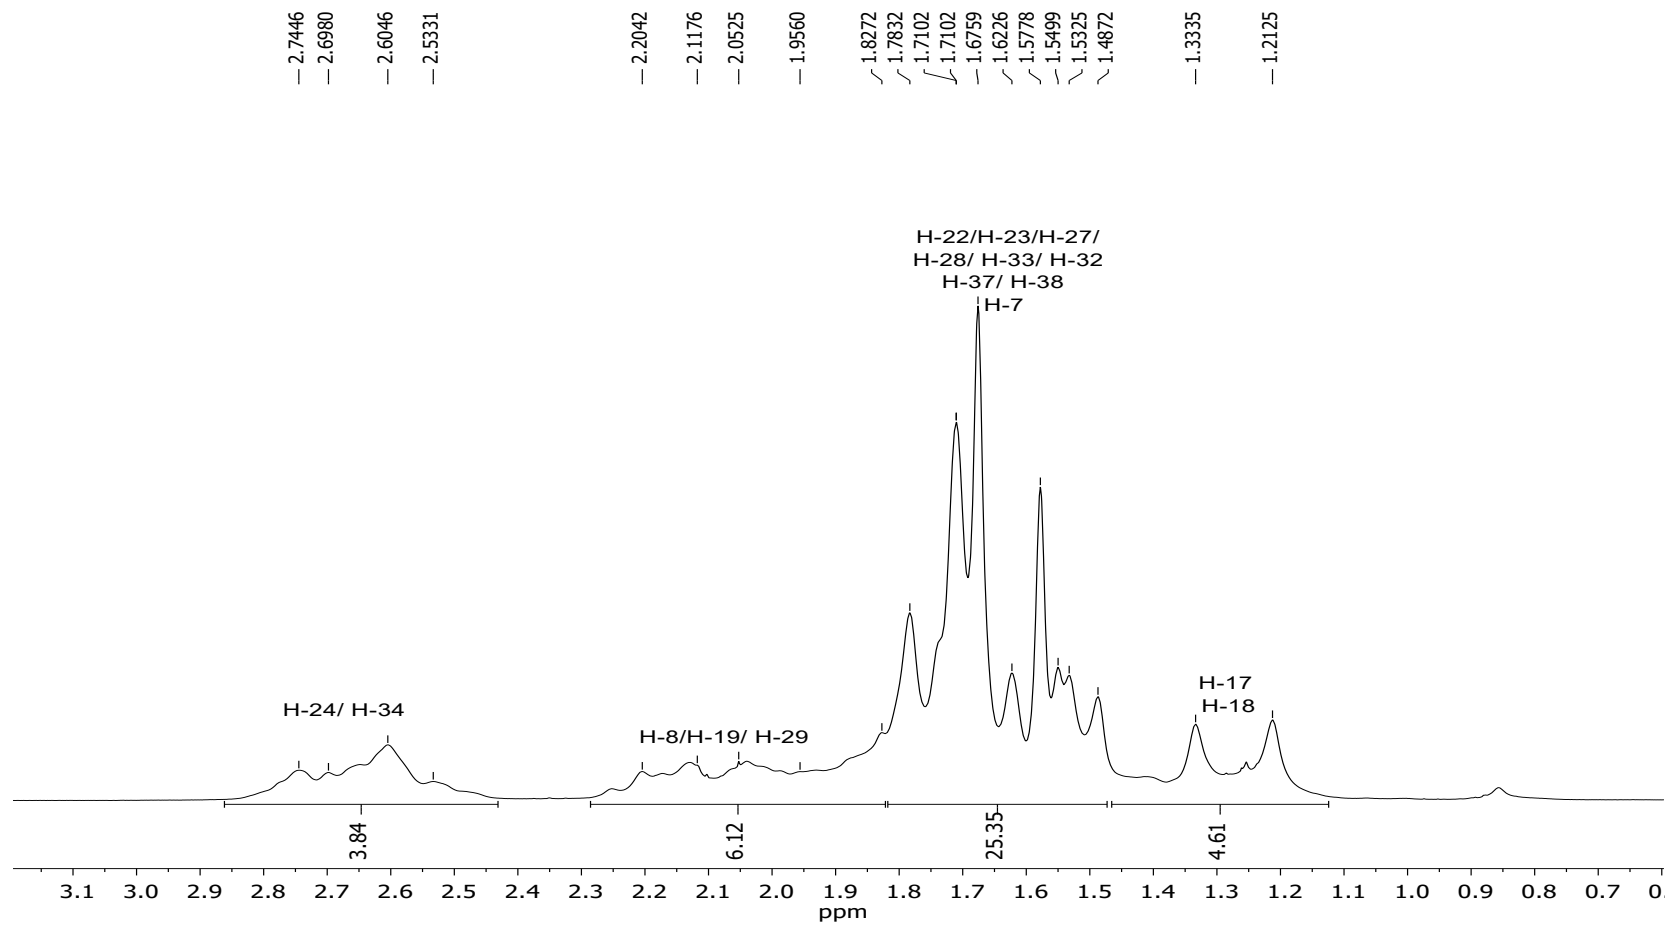

**Fig. S3.** Magnification of  $^1\text{H}$  NMR spectrum (300 MHz,  $\text{CDCl}_3$ ) from 1.0 to 2.8 ppm of guttiferone-A.

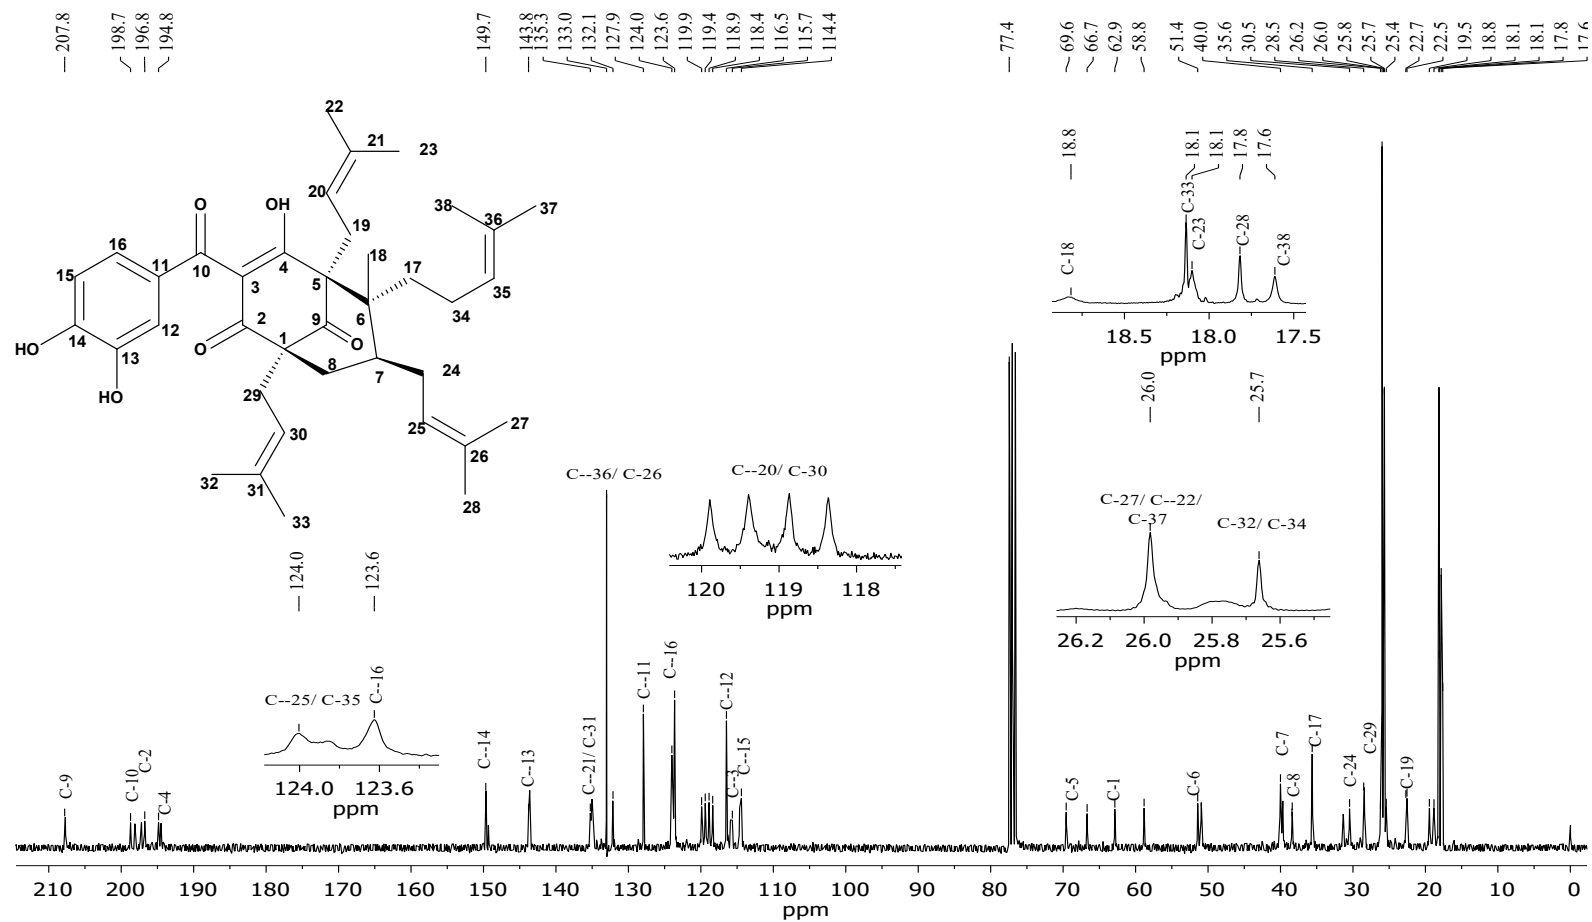

Fig. S4.  $^{13}\text{C}$  NMR spectrum (75 MHz,  $\text{CDCl}_3$ ) of guttiferone-A.

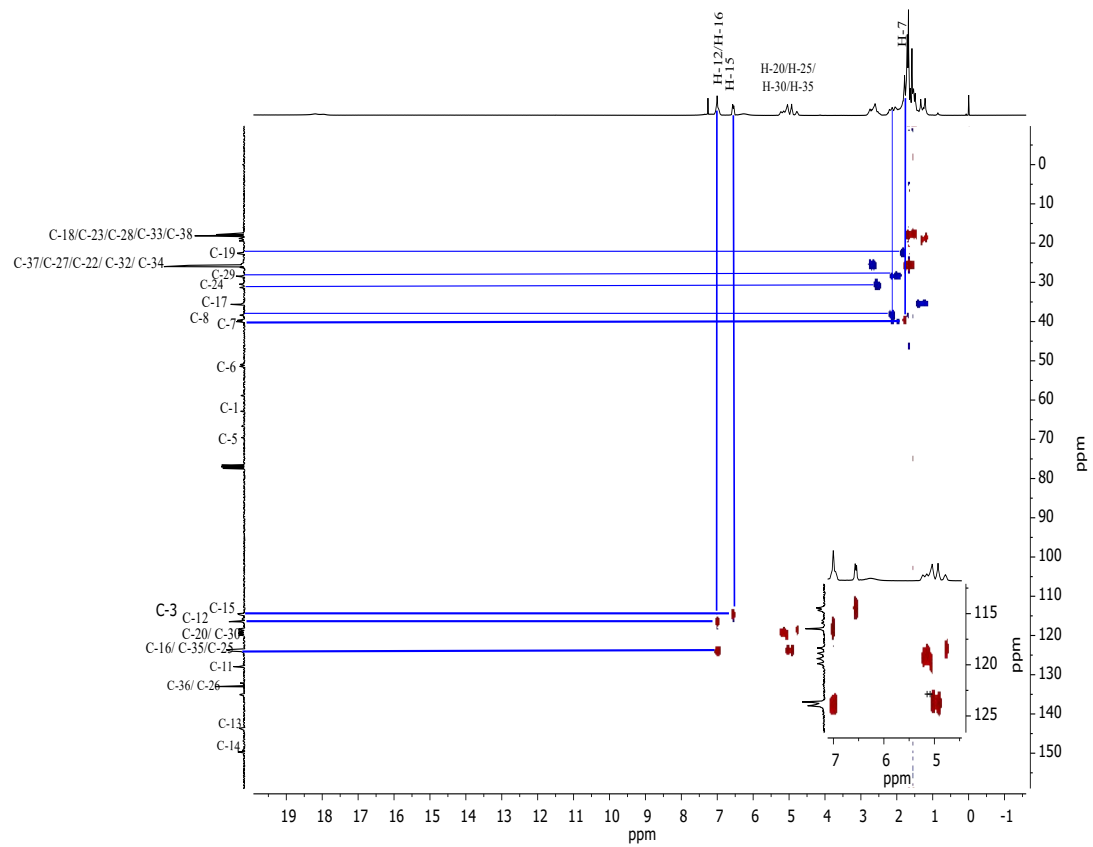

**Fig. S5.** HSQC  $^1\text{H}$ - $^{13}\text{C}$  NMR spectrum (300 MHz,  $\text{CDCl}_3$ ) of guttiferone-A.

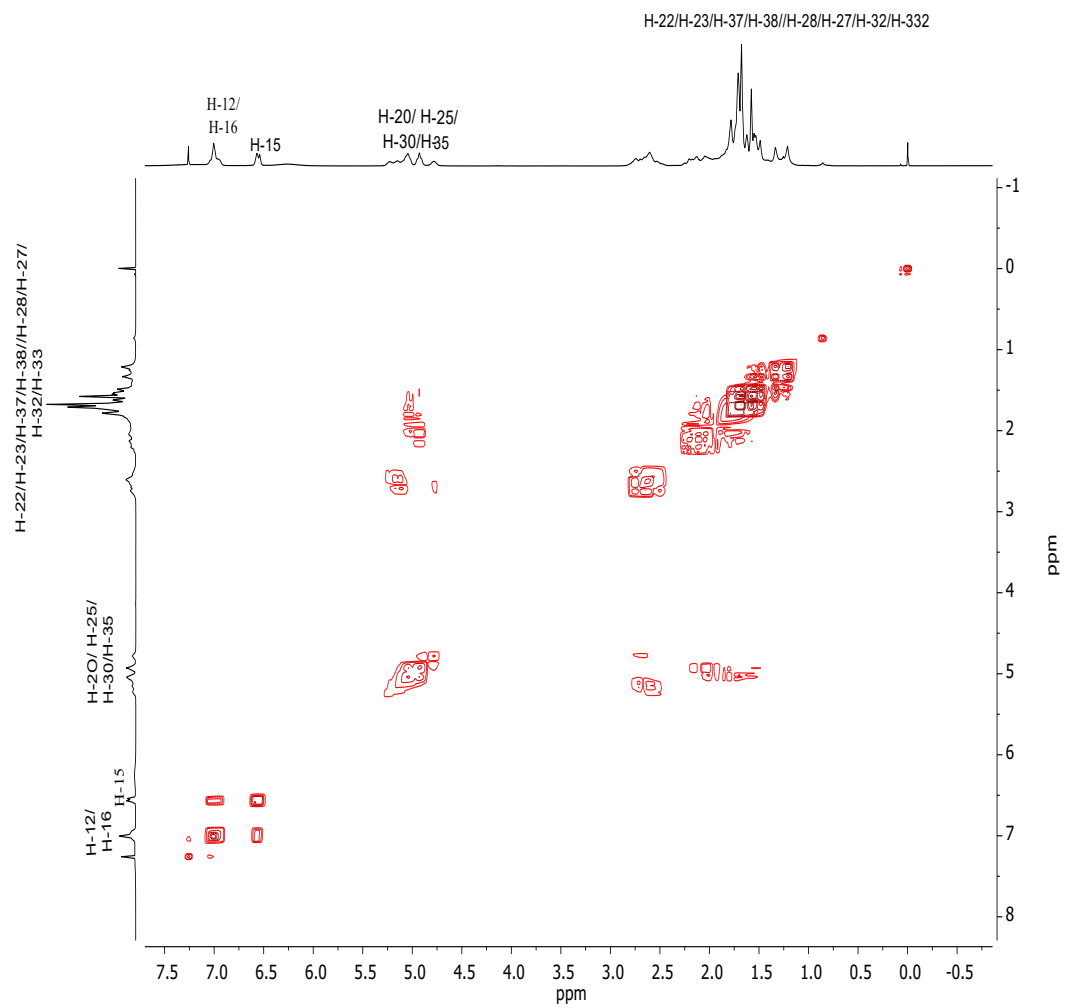

**Fig. S6.** COSY  $^1\text{H}$ - $^1\text{H}$  NMR spectrum (300 MHz,  $\text{CDCl}_3$ ) of guttiferone-A.



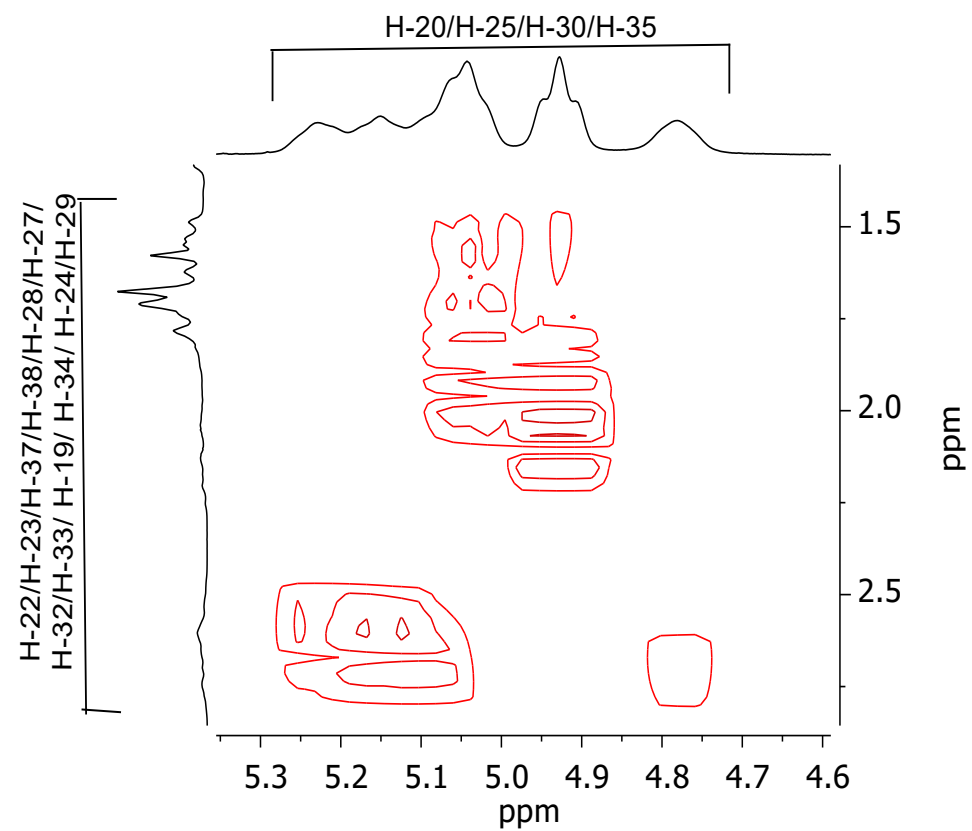

**Fig. S7.** Magnification of COSY  $^1\text{H}$ - $^1\text{H}$  NMR spectrum (300 MHz,  $\text{CDCl}_3$ ) of guttiferone-A.

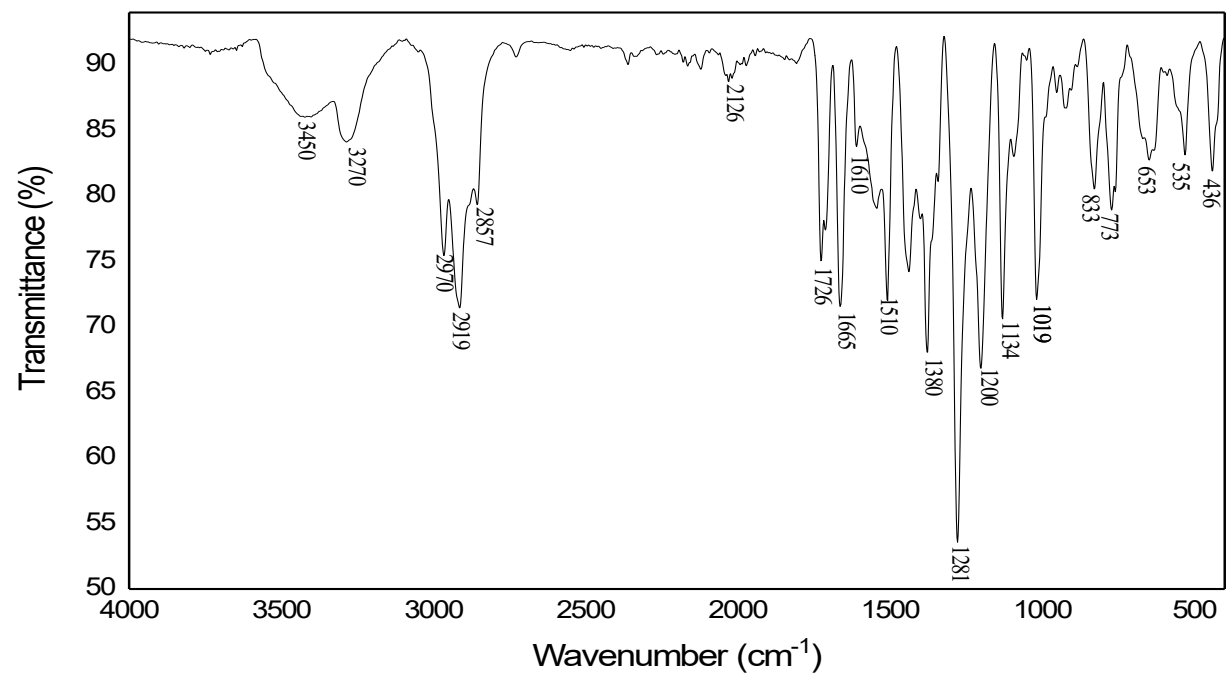

**Fig. S8.** FTIR (ATR) spectrum of compound **2**.

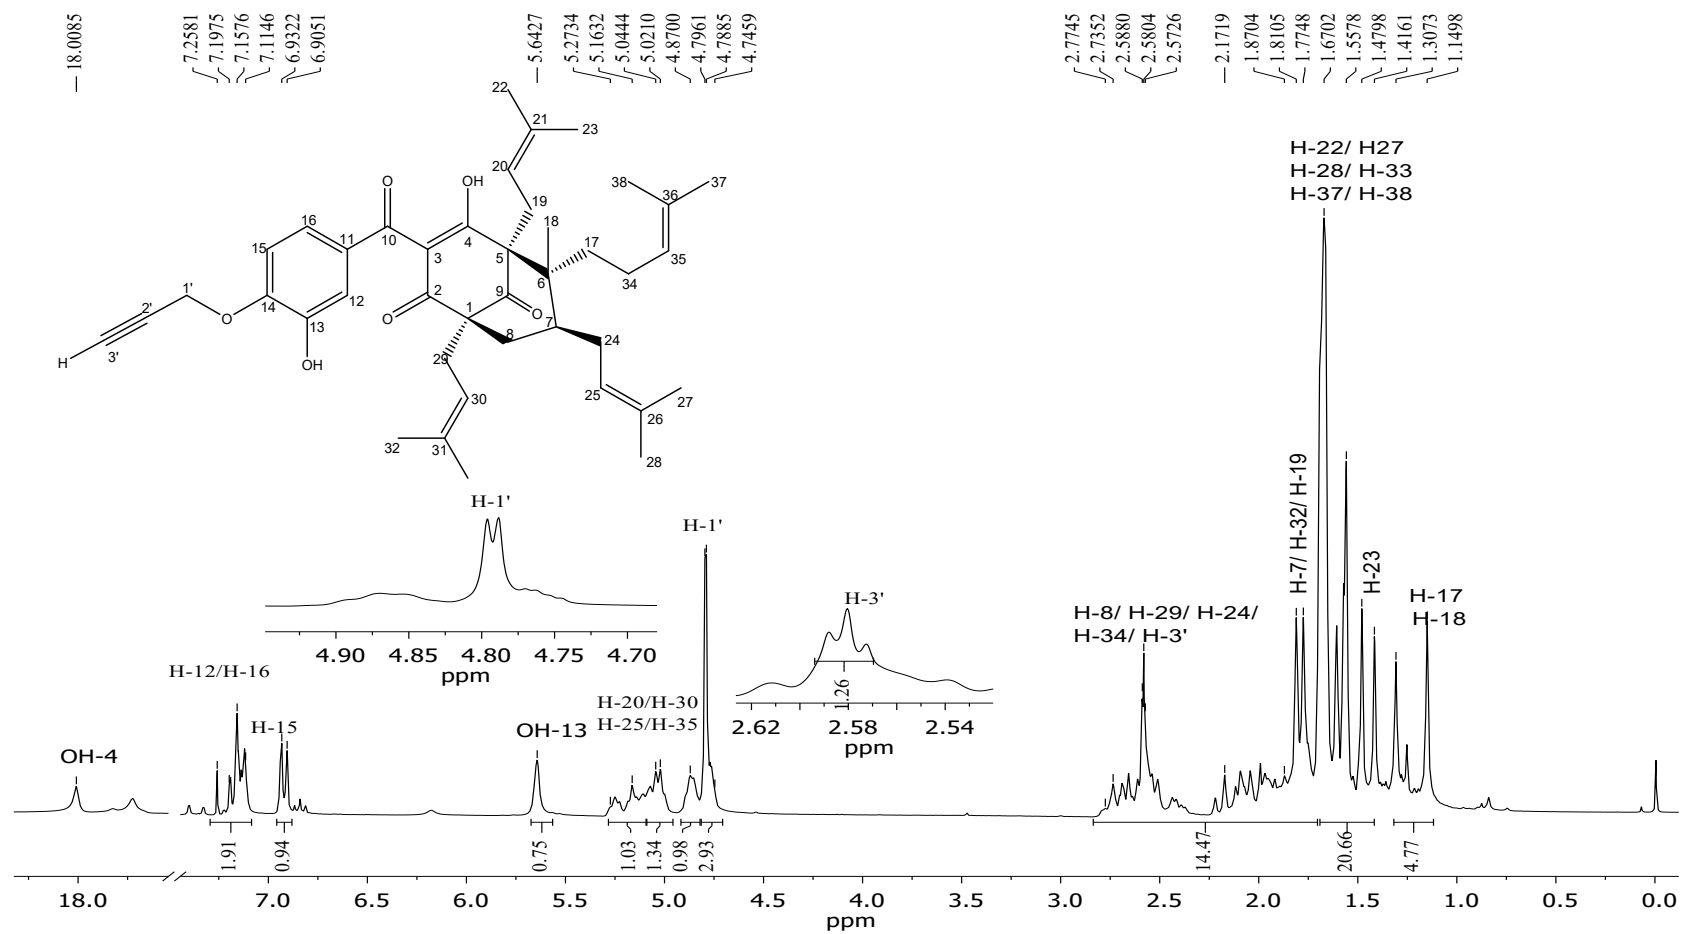

**Fig. S9.** <sup>1</sup>H NMR spectrum (300 MHz, CDCl<sub>3</sub>) of compound **2**.

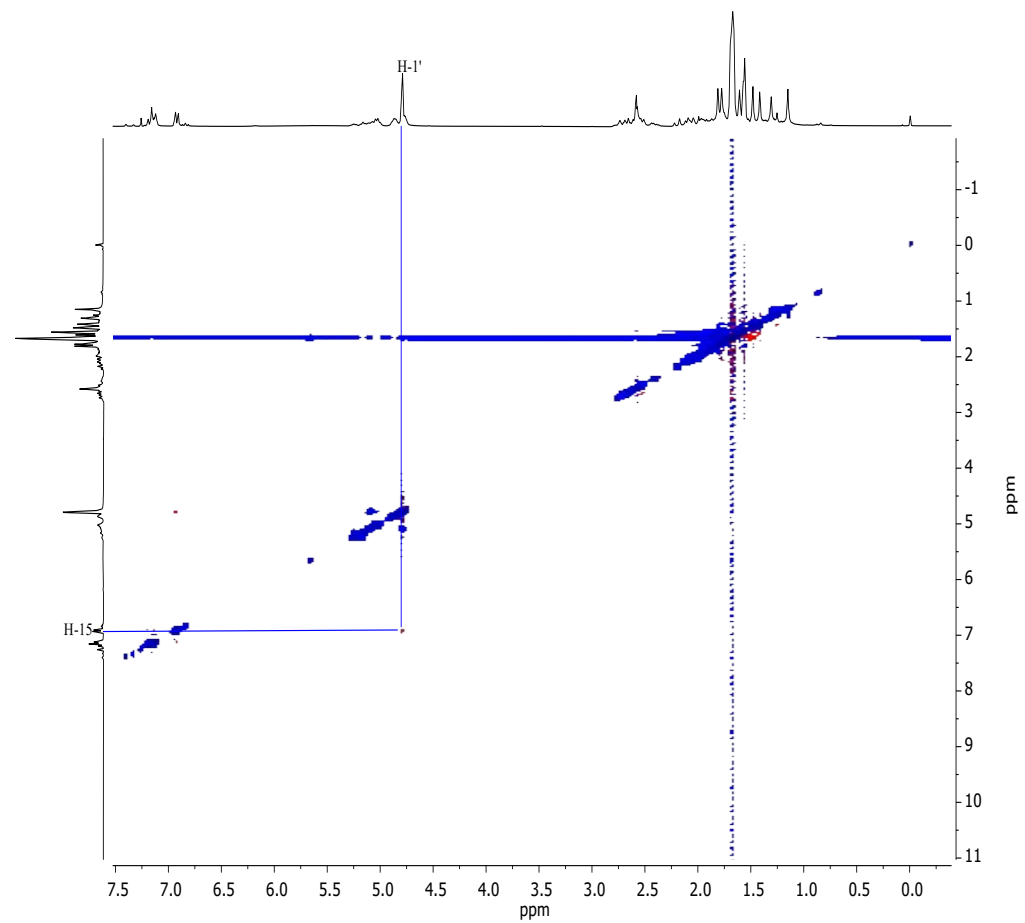

**Fig. S10.** NOESY <sup>1</sup>H-<sup>1</sup>H NMR spectrum (300 MHz, CDCl<sub>3</sub>) of compound **2**.

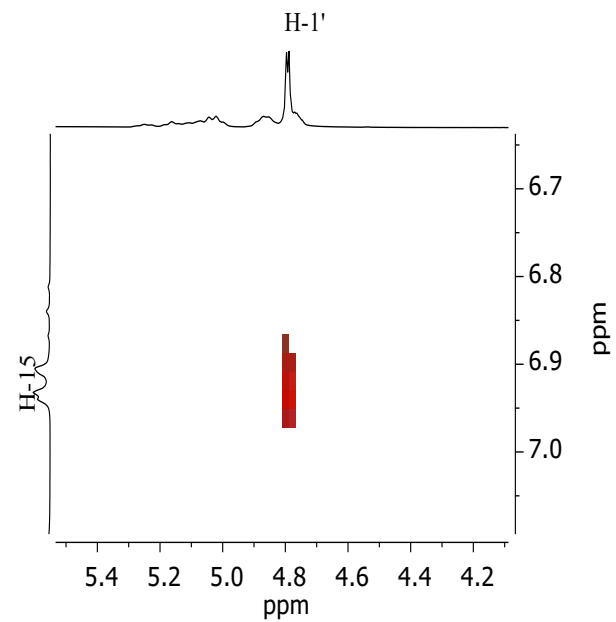

**Fig. S11.** Expansion of NOESY  $^1\text{H}$ - $^1\text{H}$  NMR spectrum (300 MHz,  $\text{CDCl}_3$ ) of compound **2**.

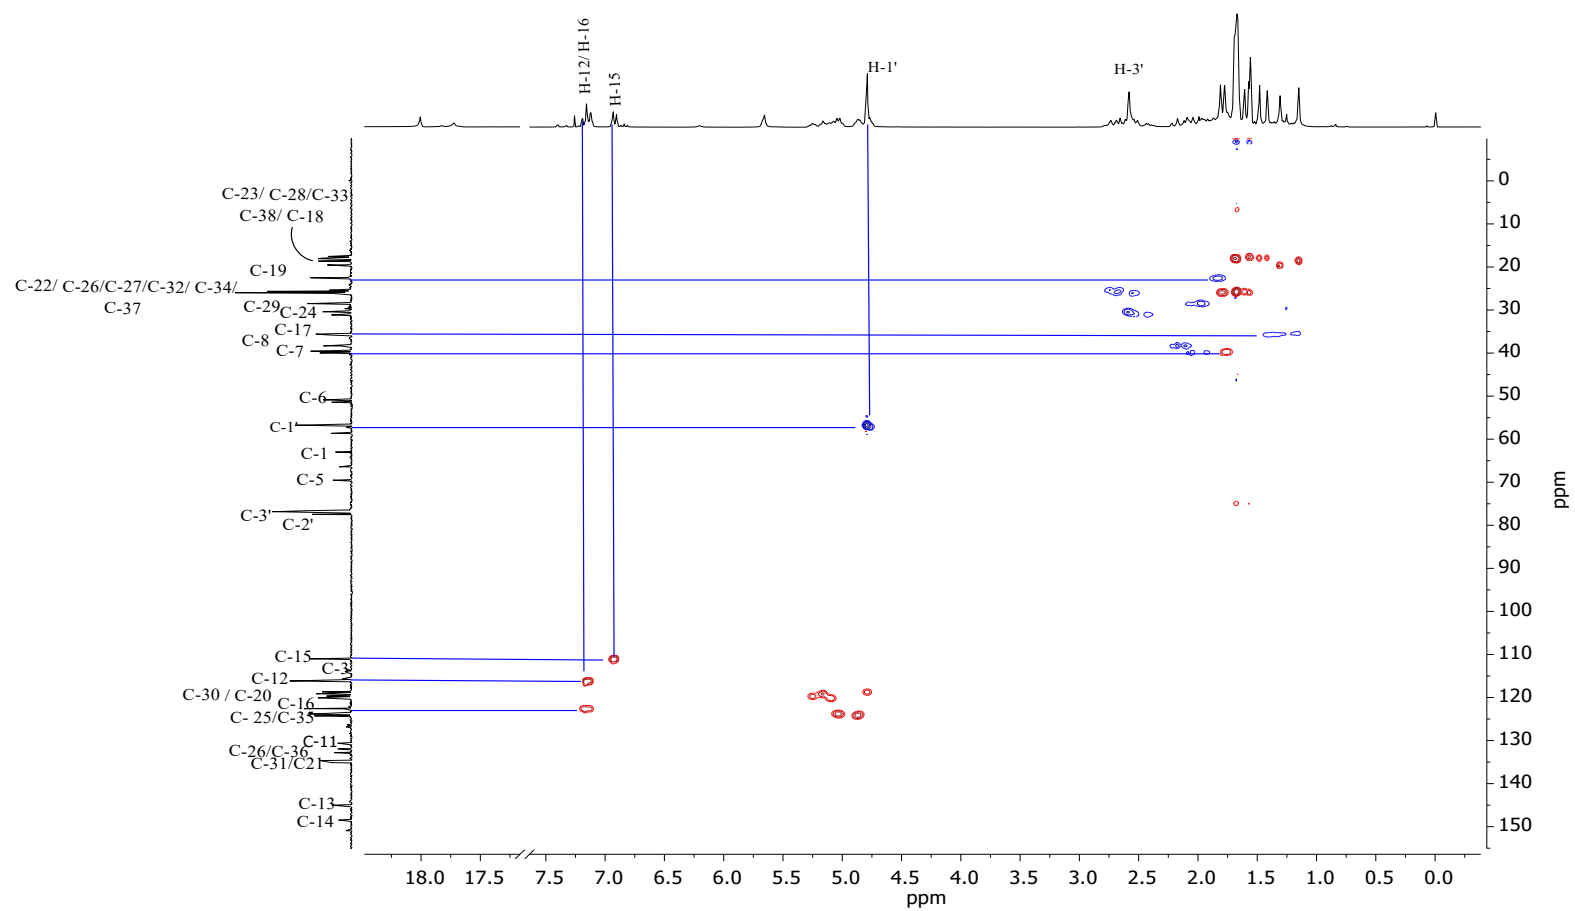

**Fig. S12.** HSQC  $^1\text{H}$ - $^{13}\text{C}$  NMR spectrum (300 MHz,  $\text{CDCl}_3$ ) of compound **2**.

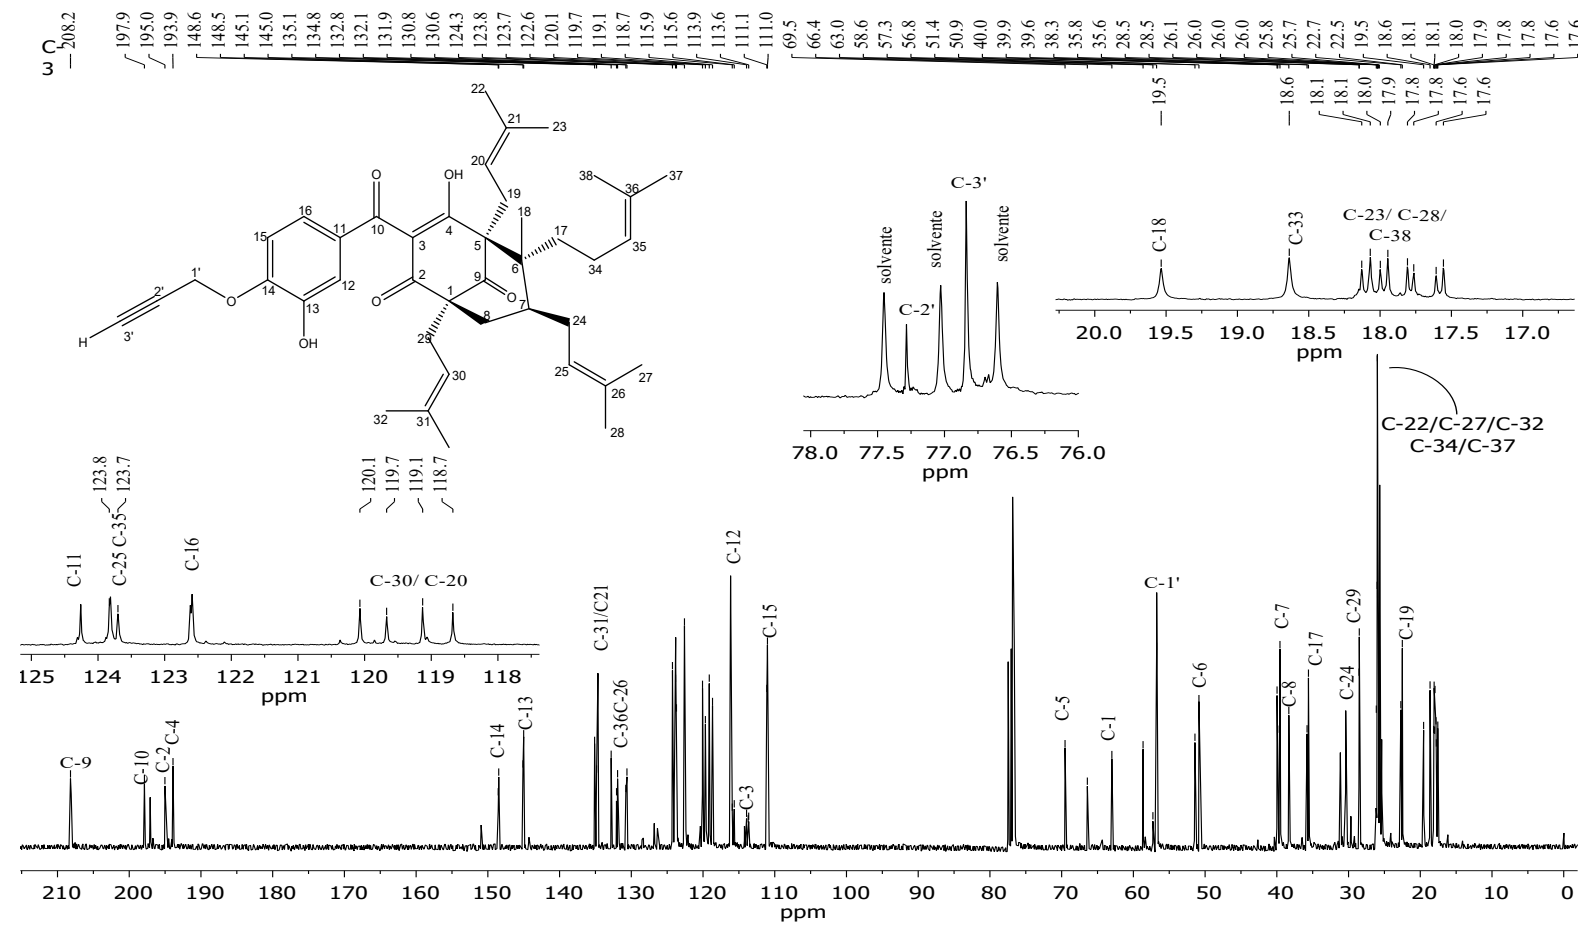

Fig. S13.  $^{13}\text{C}$  NMR spectrum (75 MHz,  $\text{CDCl}_3$ ) of compound **2**.

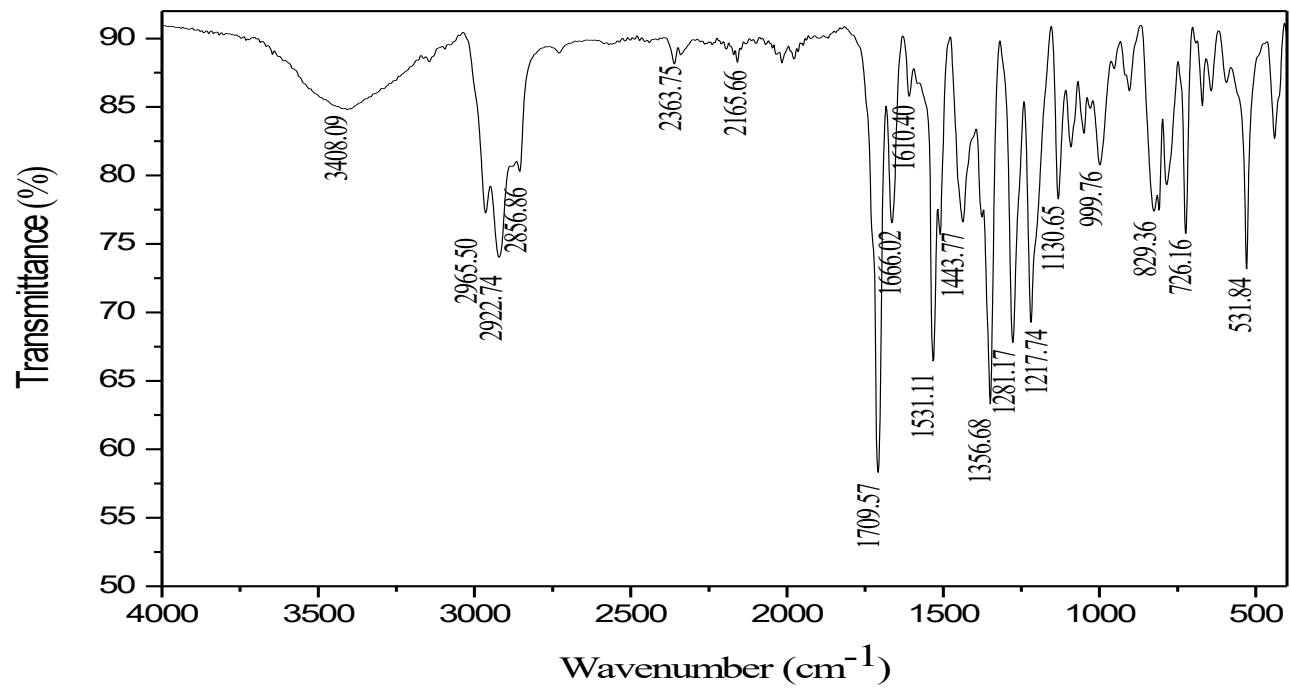

**Fig. S14.** FTIR (ATR) spectrum of compound 2.



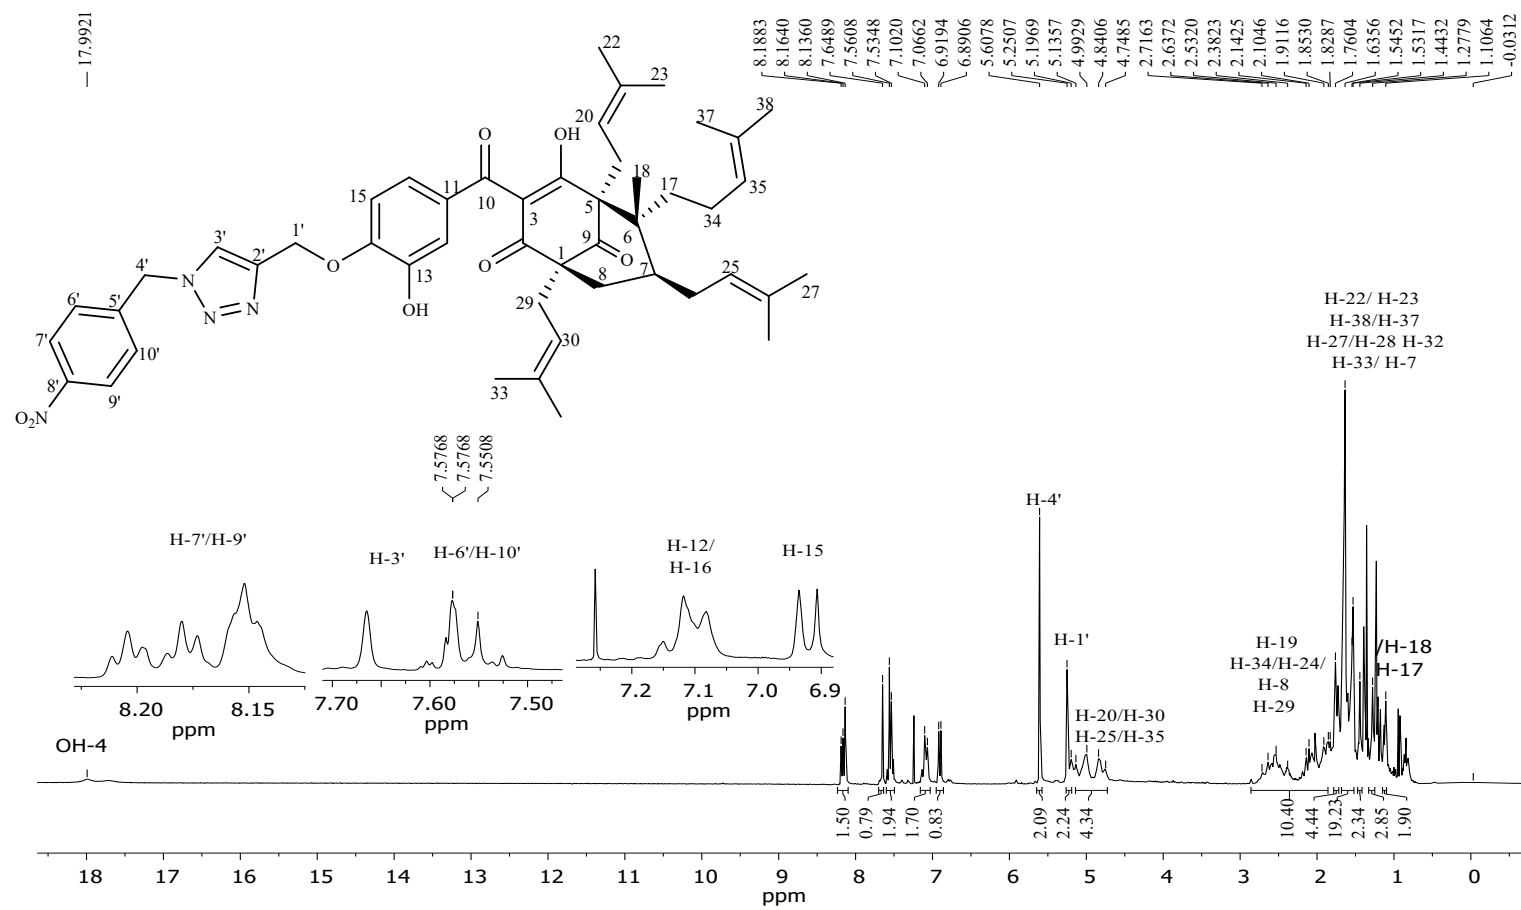

**Fig. S15.** <sup>1</sup>H NMR spectrum (300 MHz, CDCl<sub>3</sub>) of compound **3**.

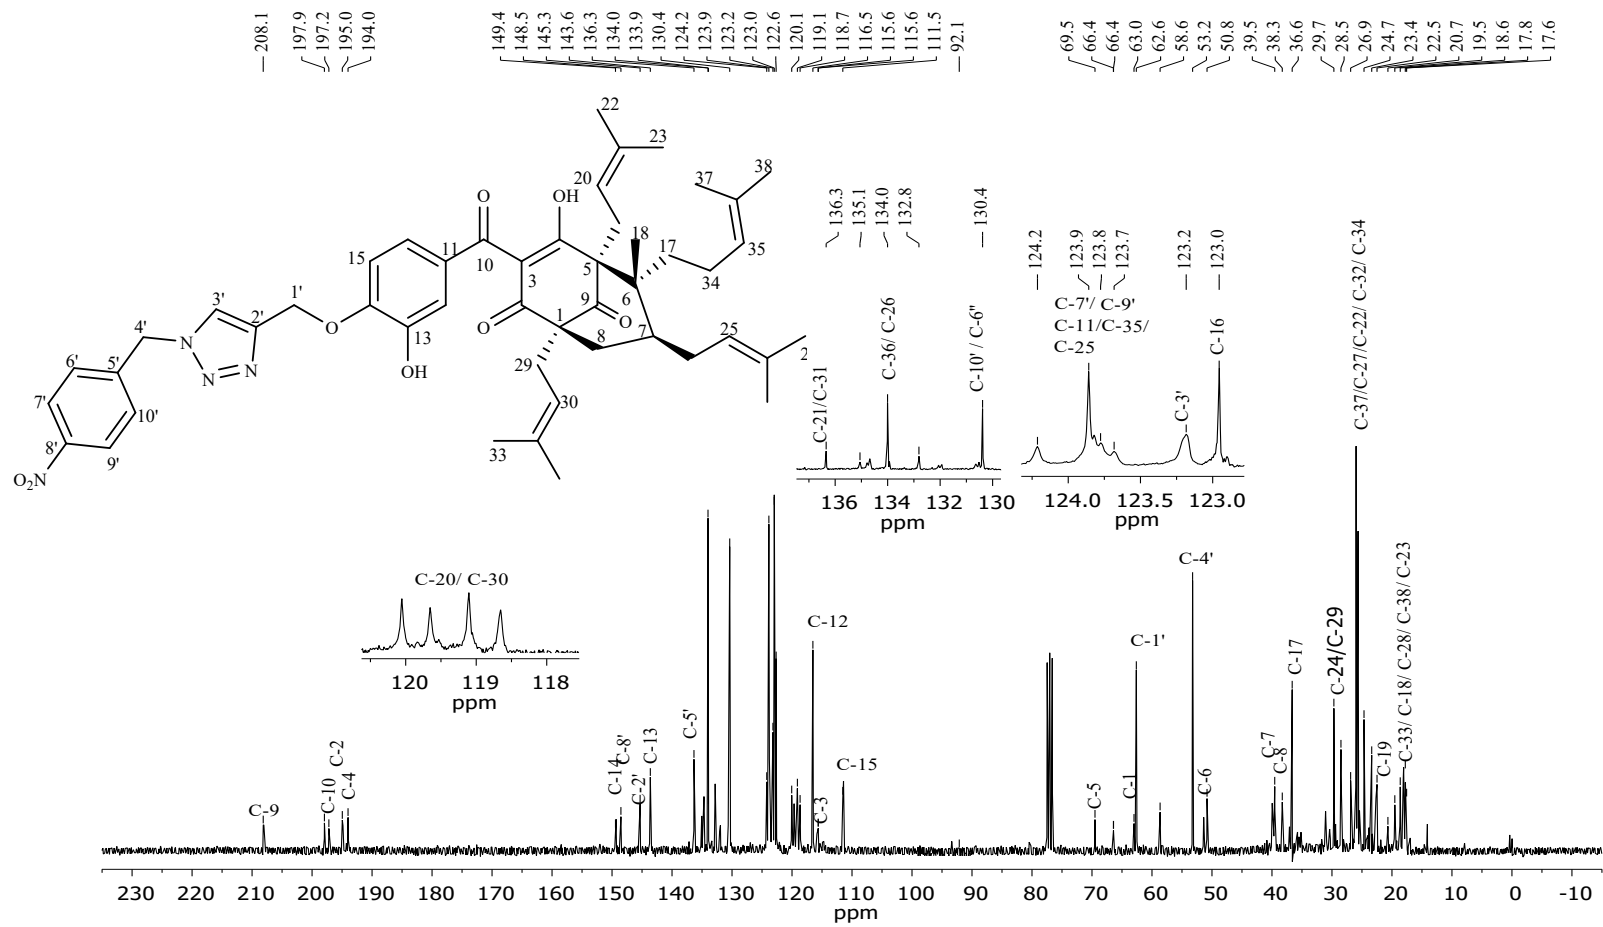

Fig. S16.  $^{13}\text{C}$  NMR spectrum (75 MHz,  $\text{CDCl}_3$ ) of compound **3**.

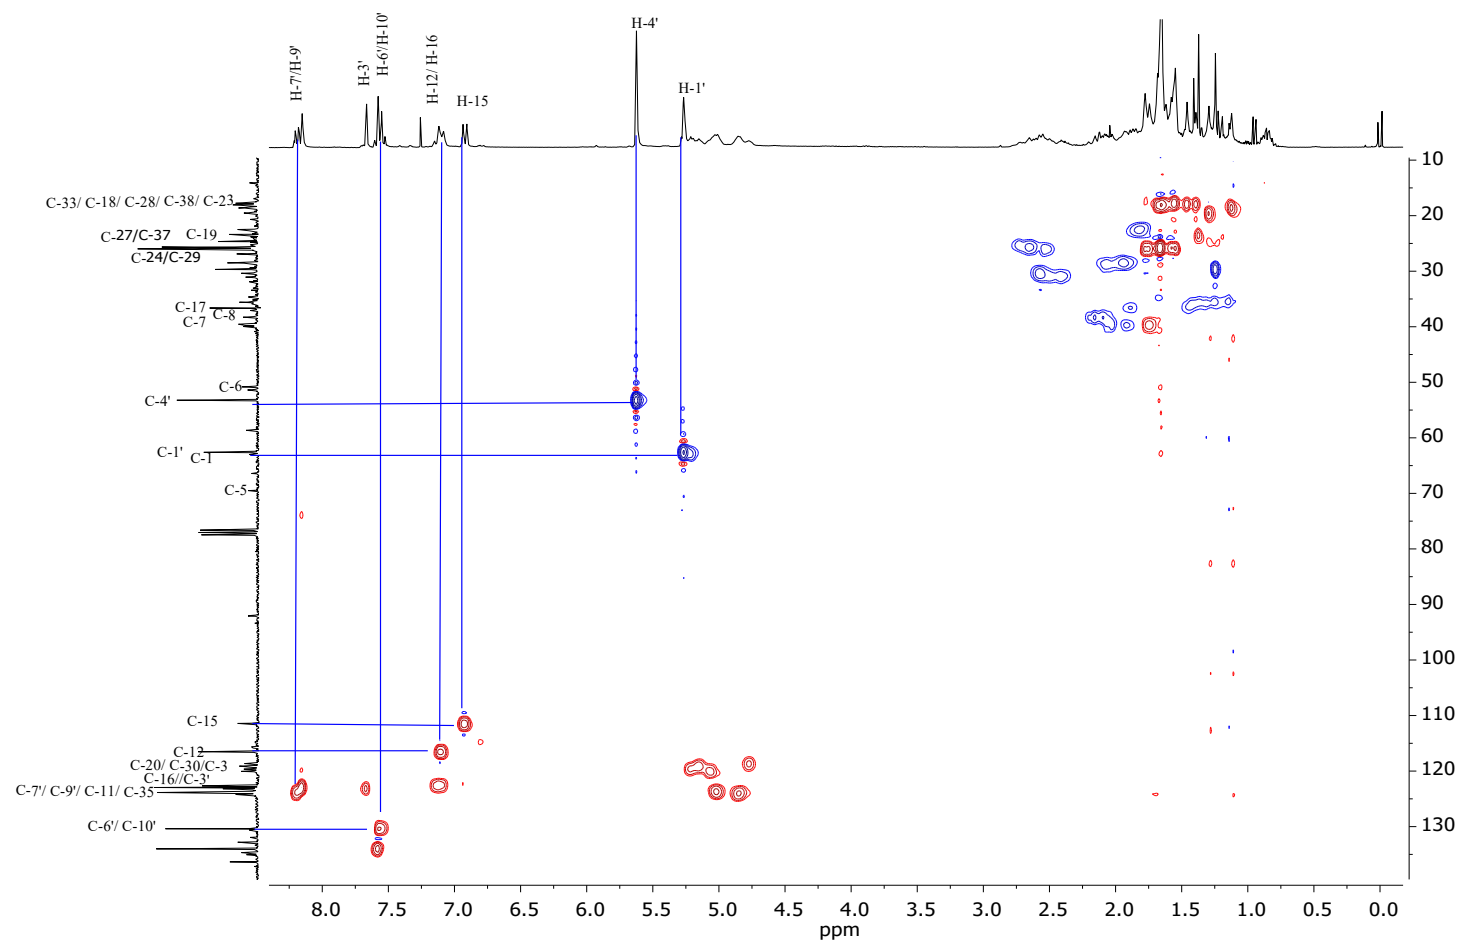

**Fig. S17.** HSQC  $^1\text{H}$ - $^{13}\text{C}$  NMR spectrum (300 MHz,  $\text{CDCl}_3$ ) of compound **3**.

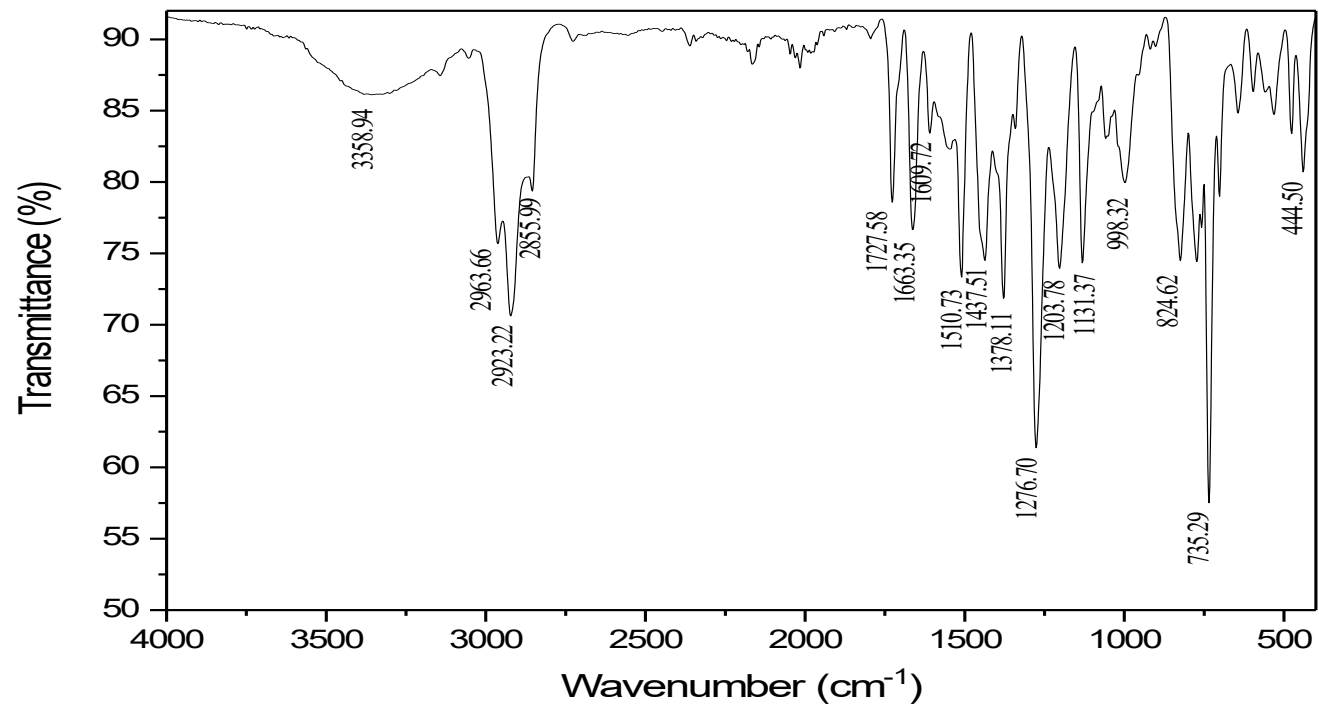

**Fig. S18.** FTIR (ATR) spectrum of compound **4**.

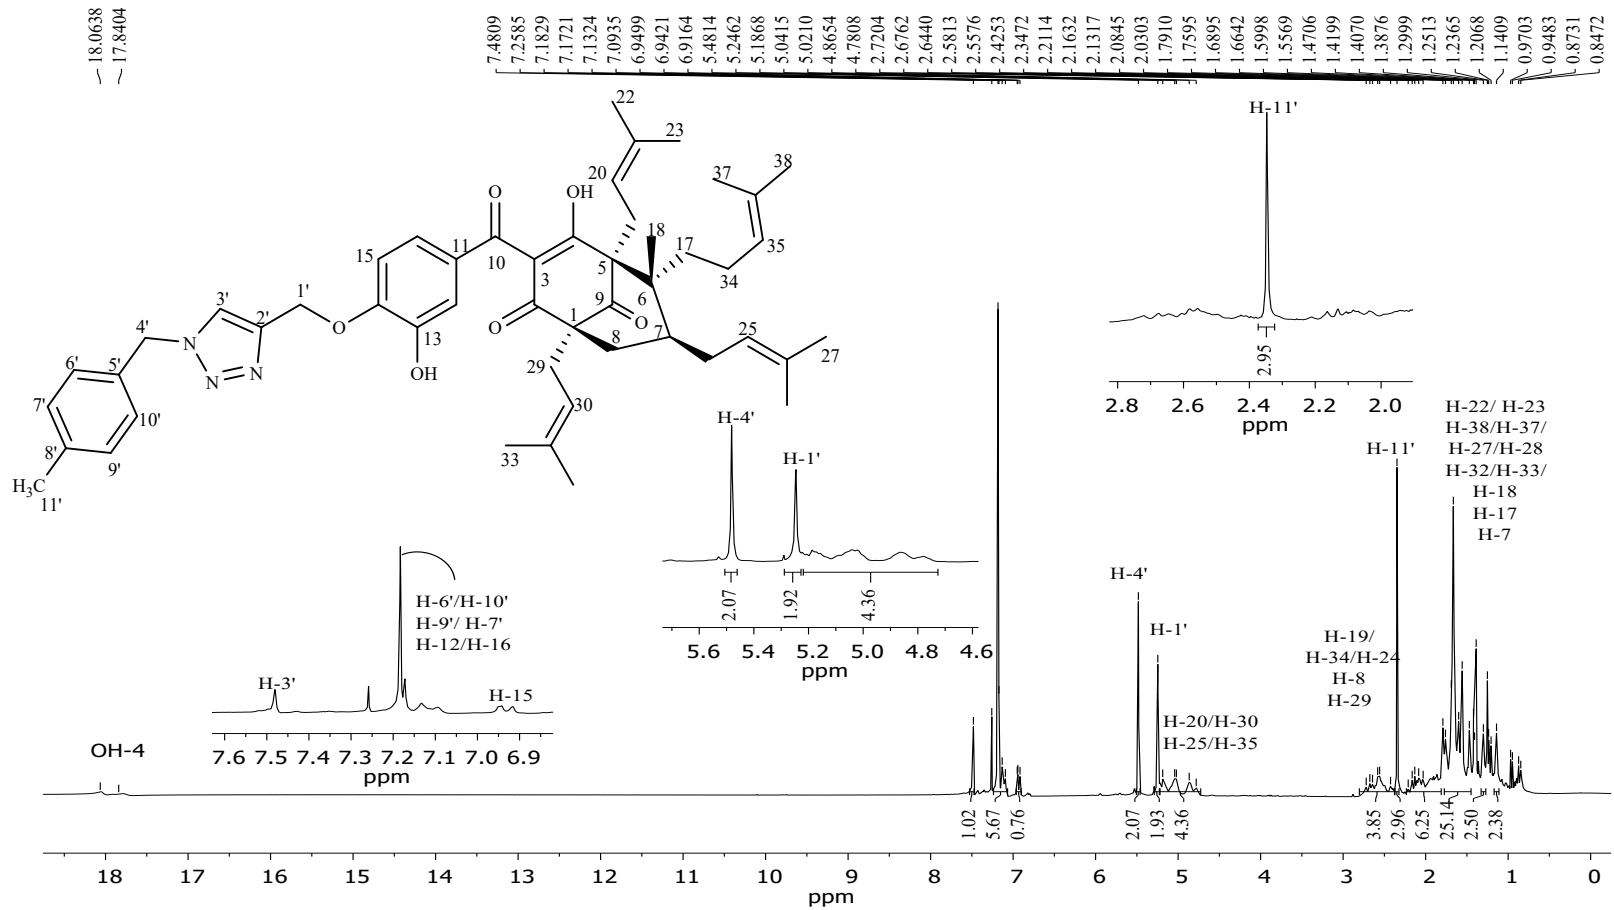

Fig. S19. <sup>1</sup>H NMR spectrum (300 MHz, CDCl<sub>3</sub>) of compound 4.

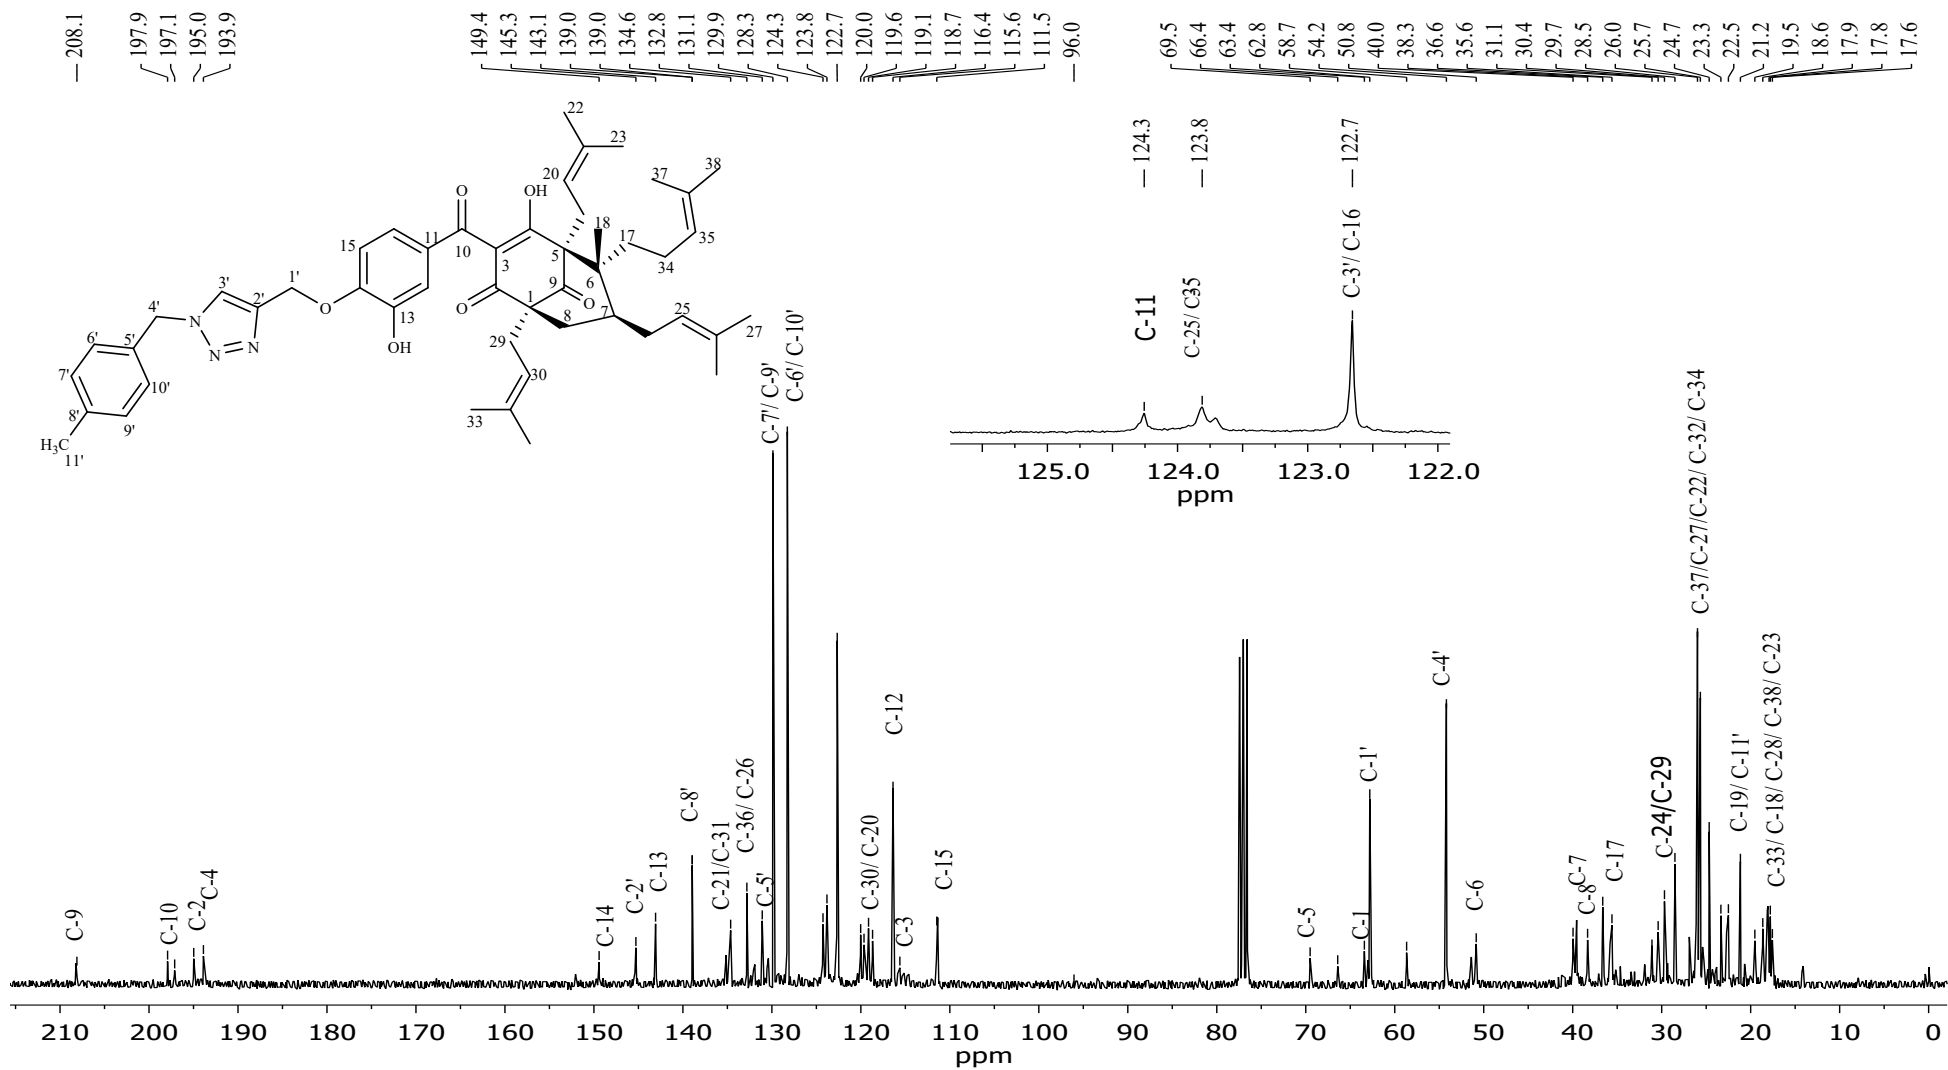

Fig. S20. <sup>13</sup>C NMR spectrum (75 MHz, CDCl<sub>3</sub>) of compound 4.

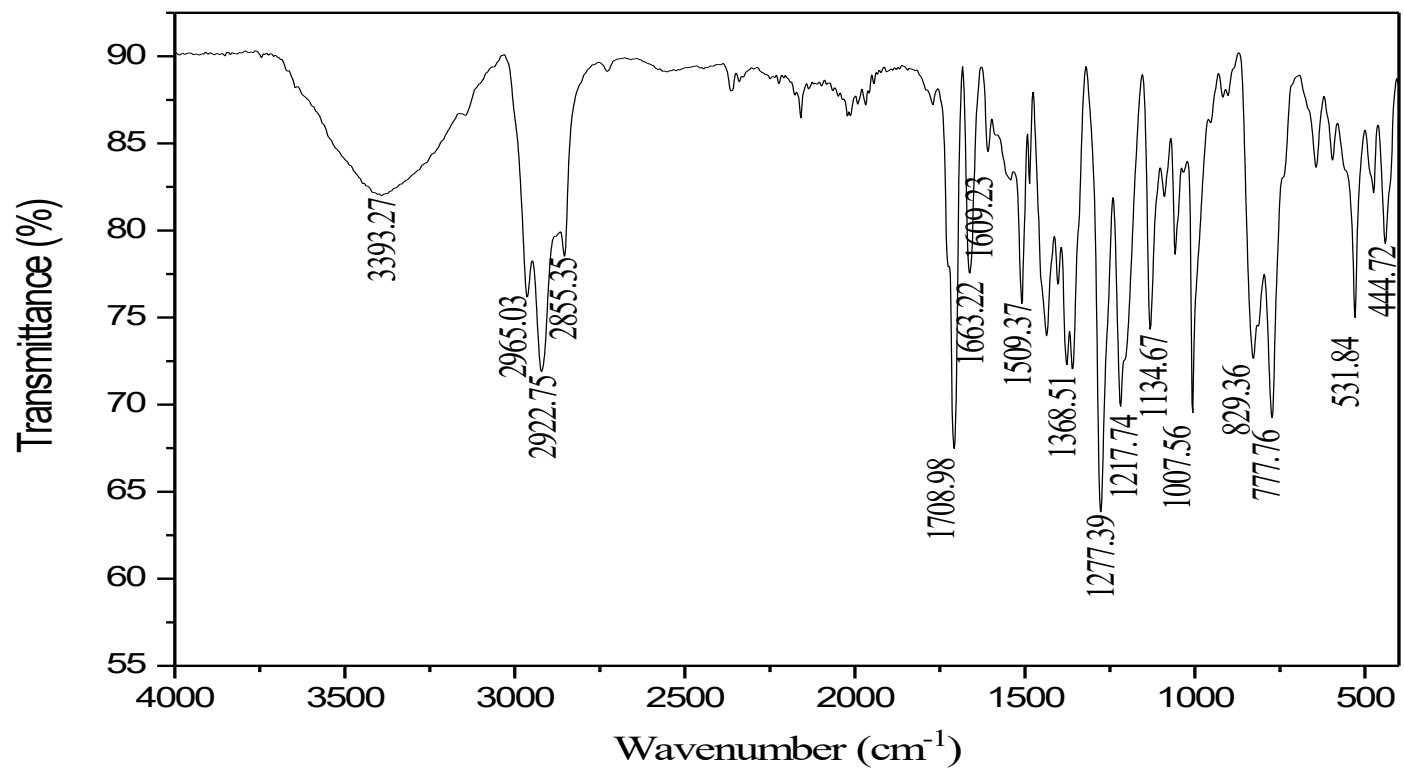

**Fig. S21.** FTIR (ATR) spectrum of compound **5**.

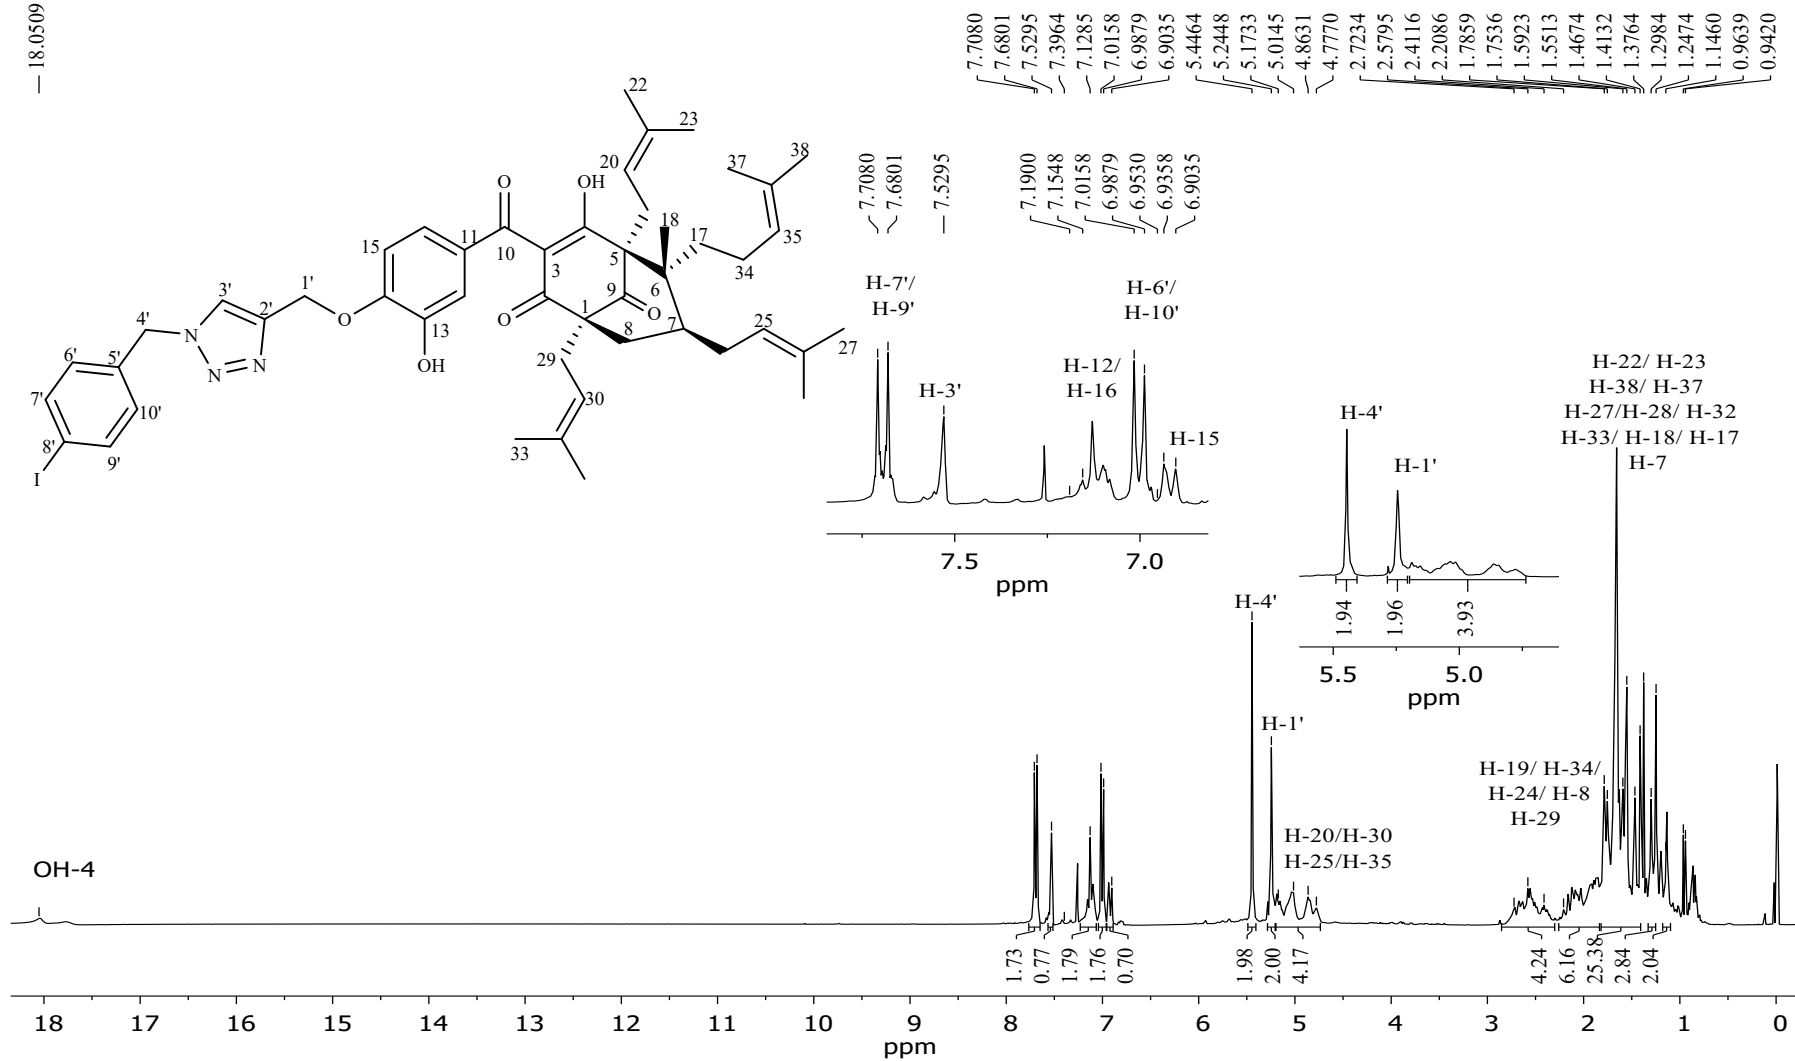

Fig. S22.  $^1\text{H}$  NMR spectrum (300 MHz,  $\text{CDCl}_3$ ) of compound 5.



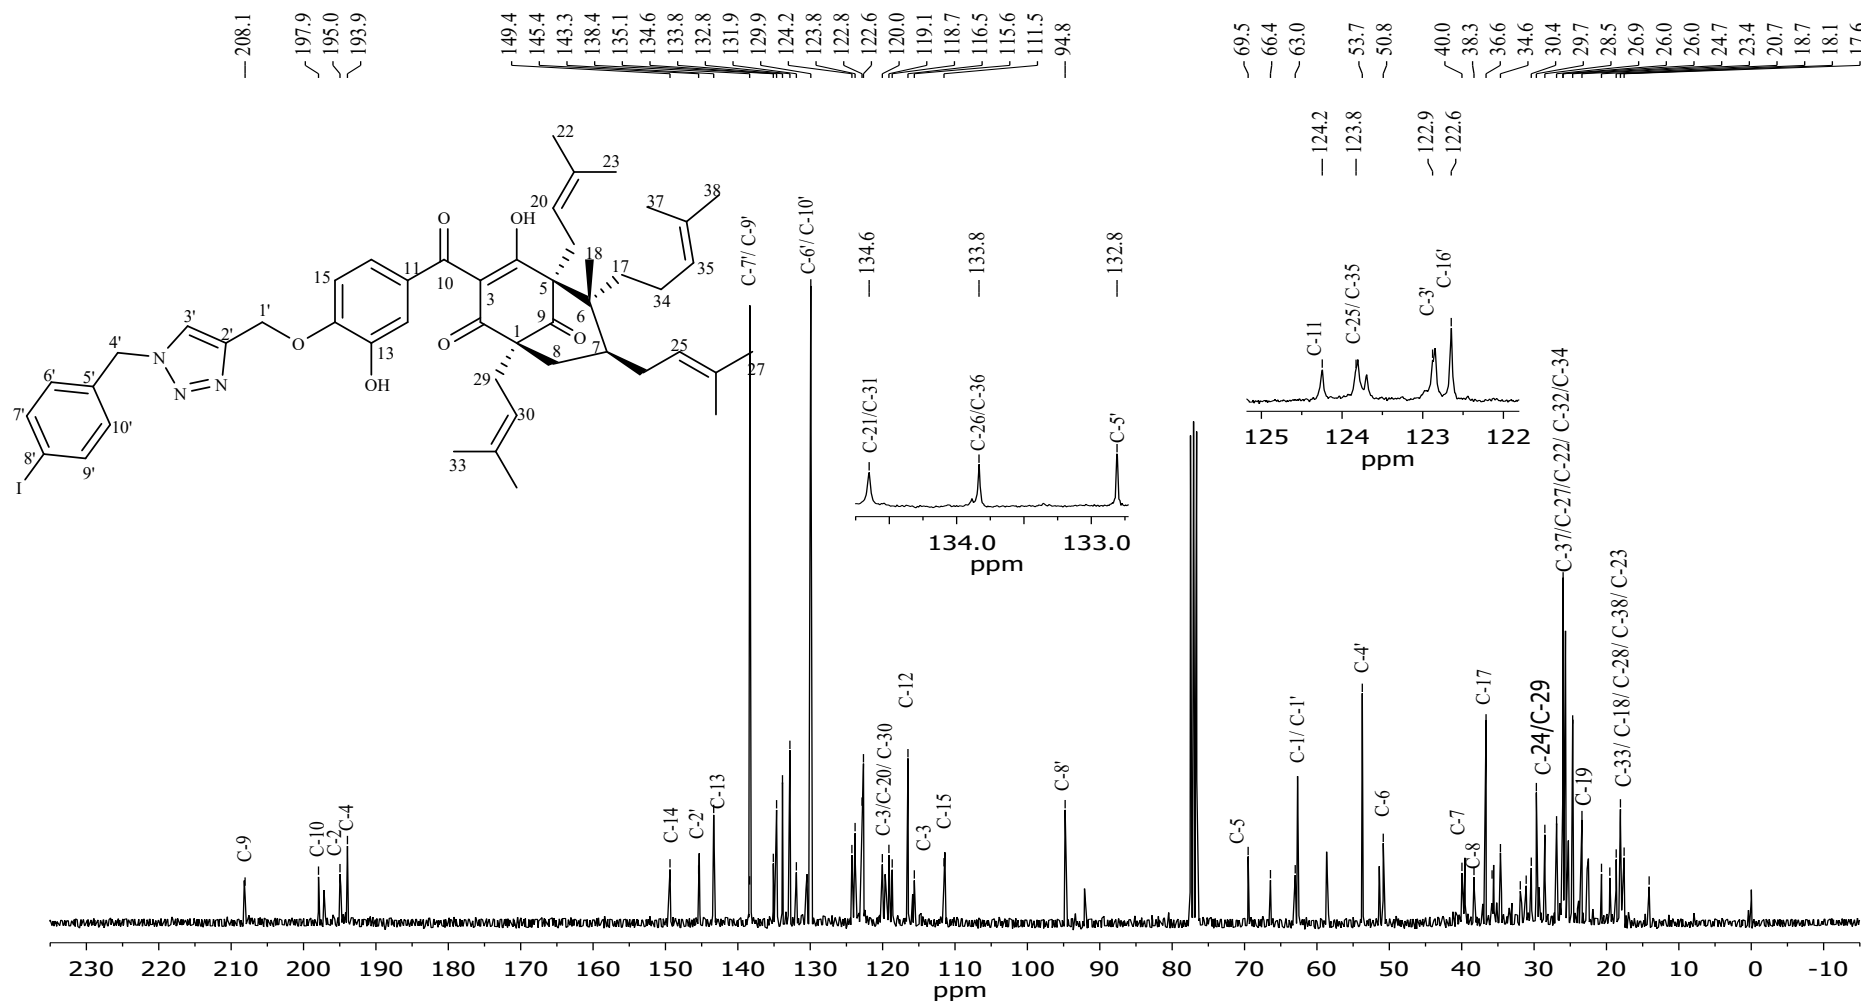

Fig. S23.  $^{13}\text{C}$  NMR spectrum (75 MHz,  $\text{CDCl}_3$ ) of compound 5.

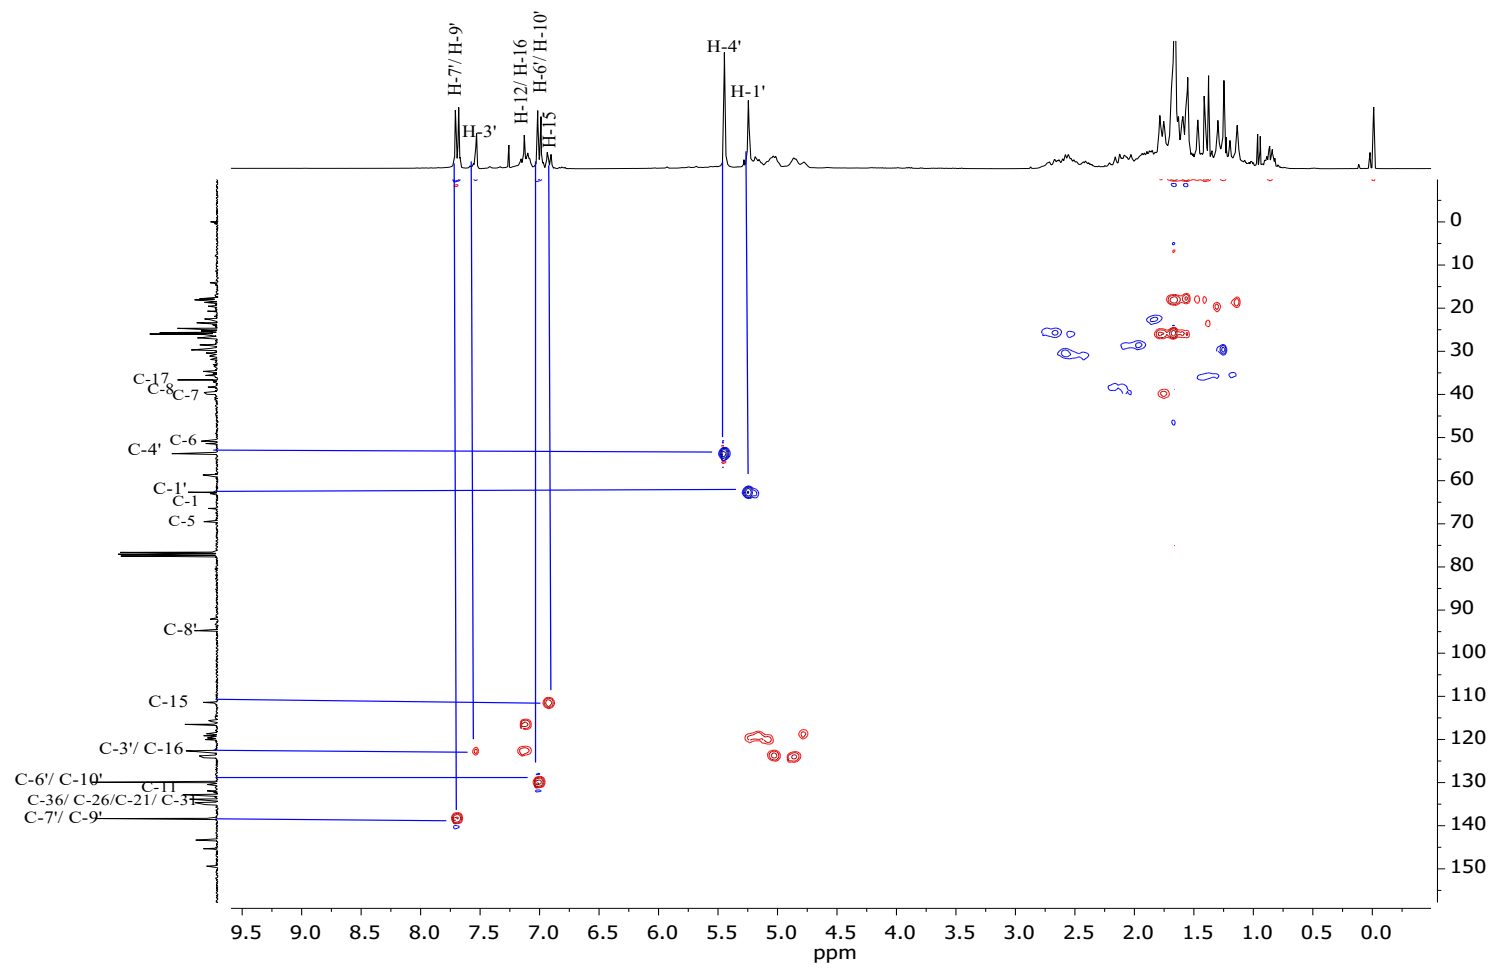

**Fig. S24.** HSQC  $^1\text{H}$ - $^{13}\text{C}$  NMR spectrum (300 MHz,  $\text{CDCl}_3$ ) of compound **5**.

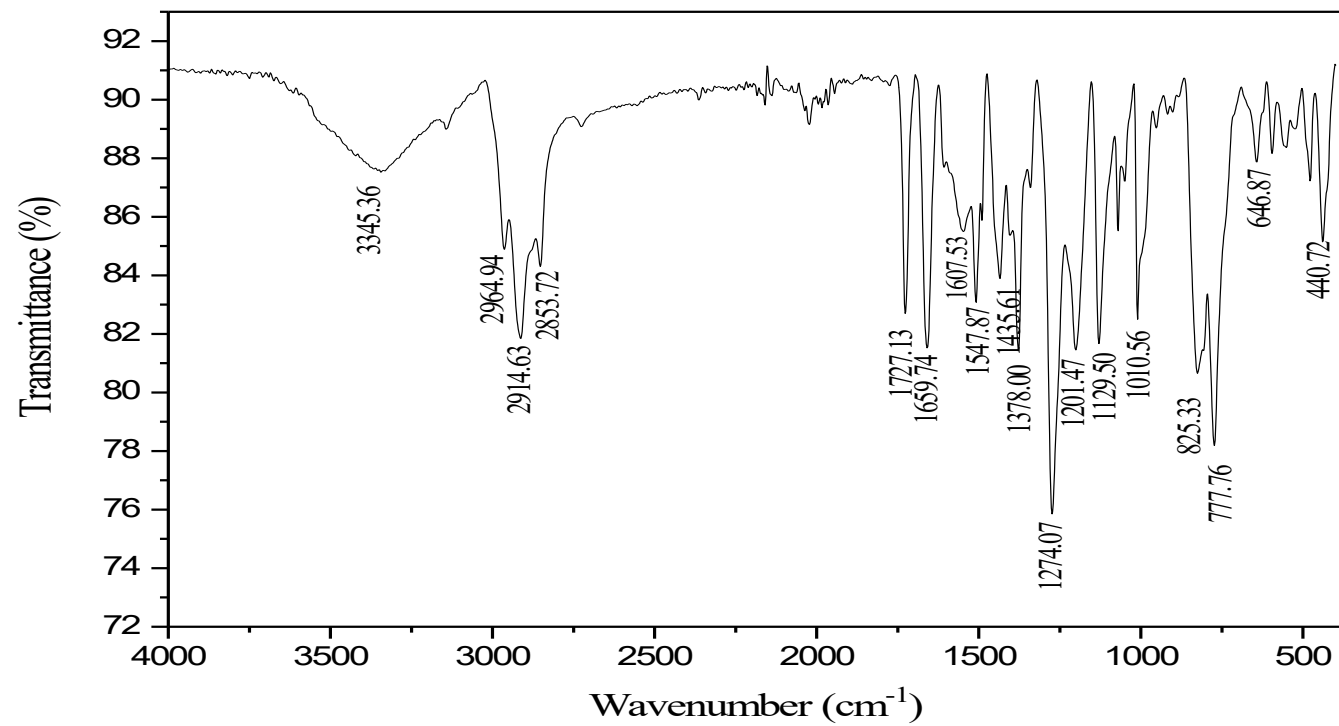

Fig. S25. FTIR (ATR) spectrum of compound 6.

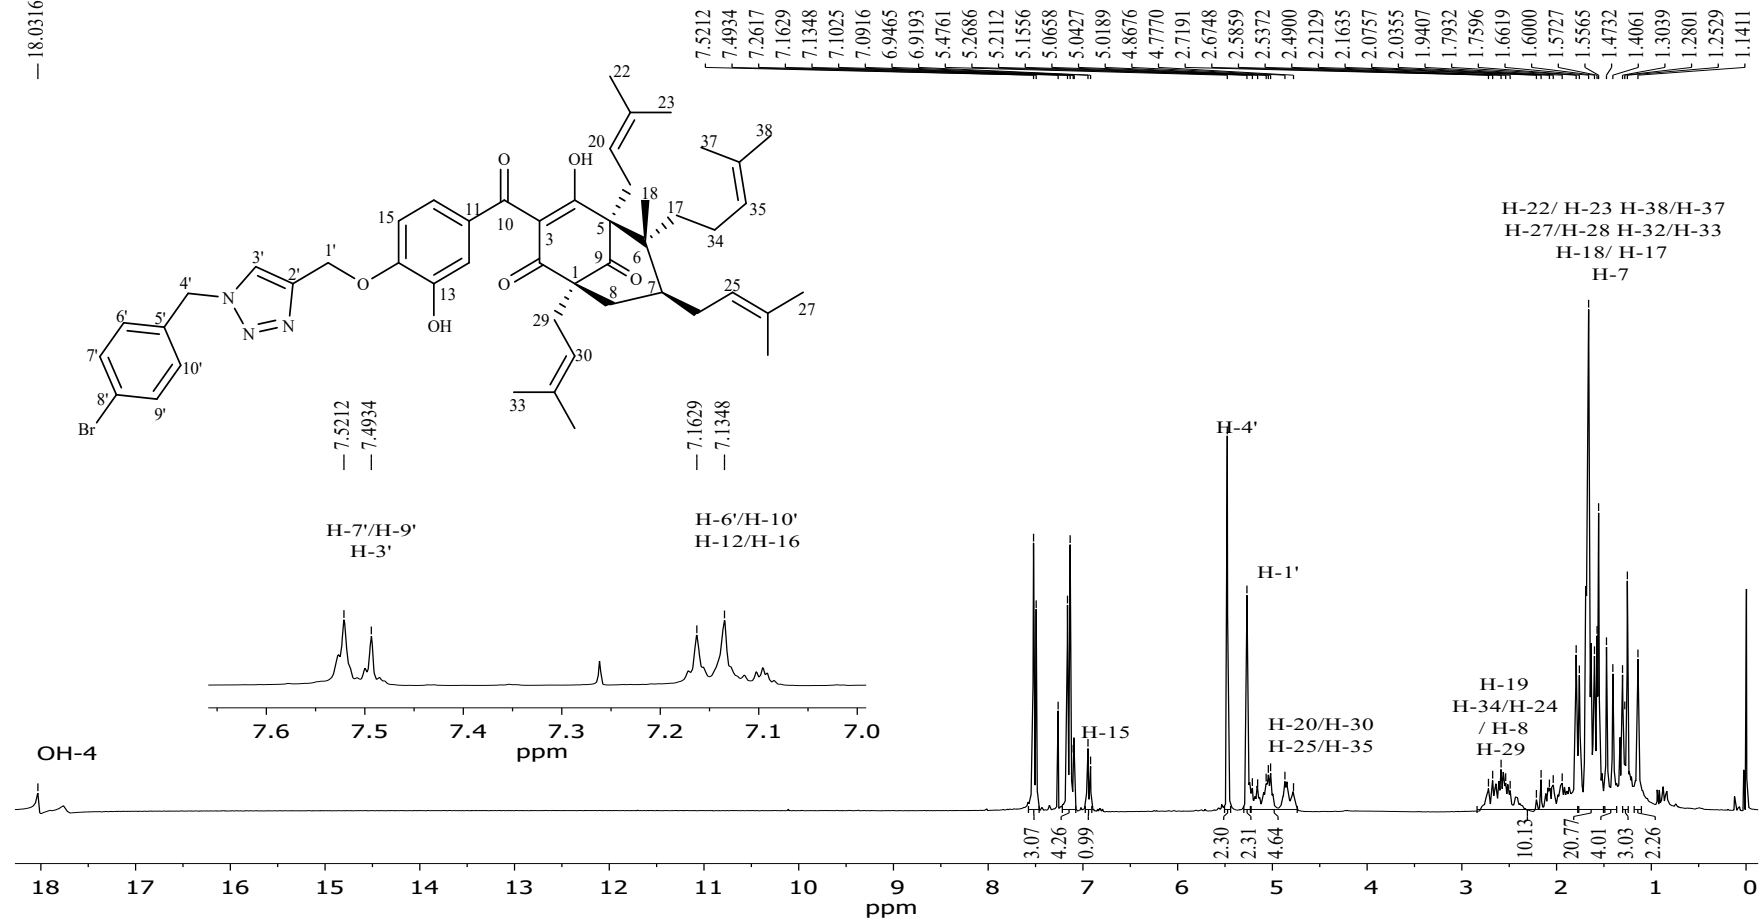

**Fig. S26.** <sup>1</sup>H NMR spectrum (300 MHz, CDCl<sub>3</sub>) of compound 6.

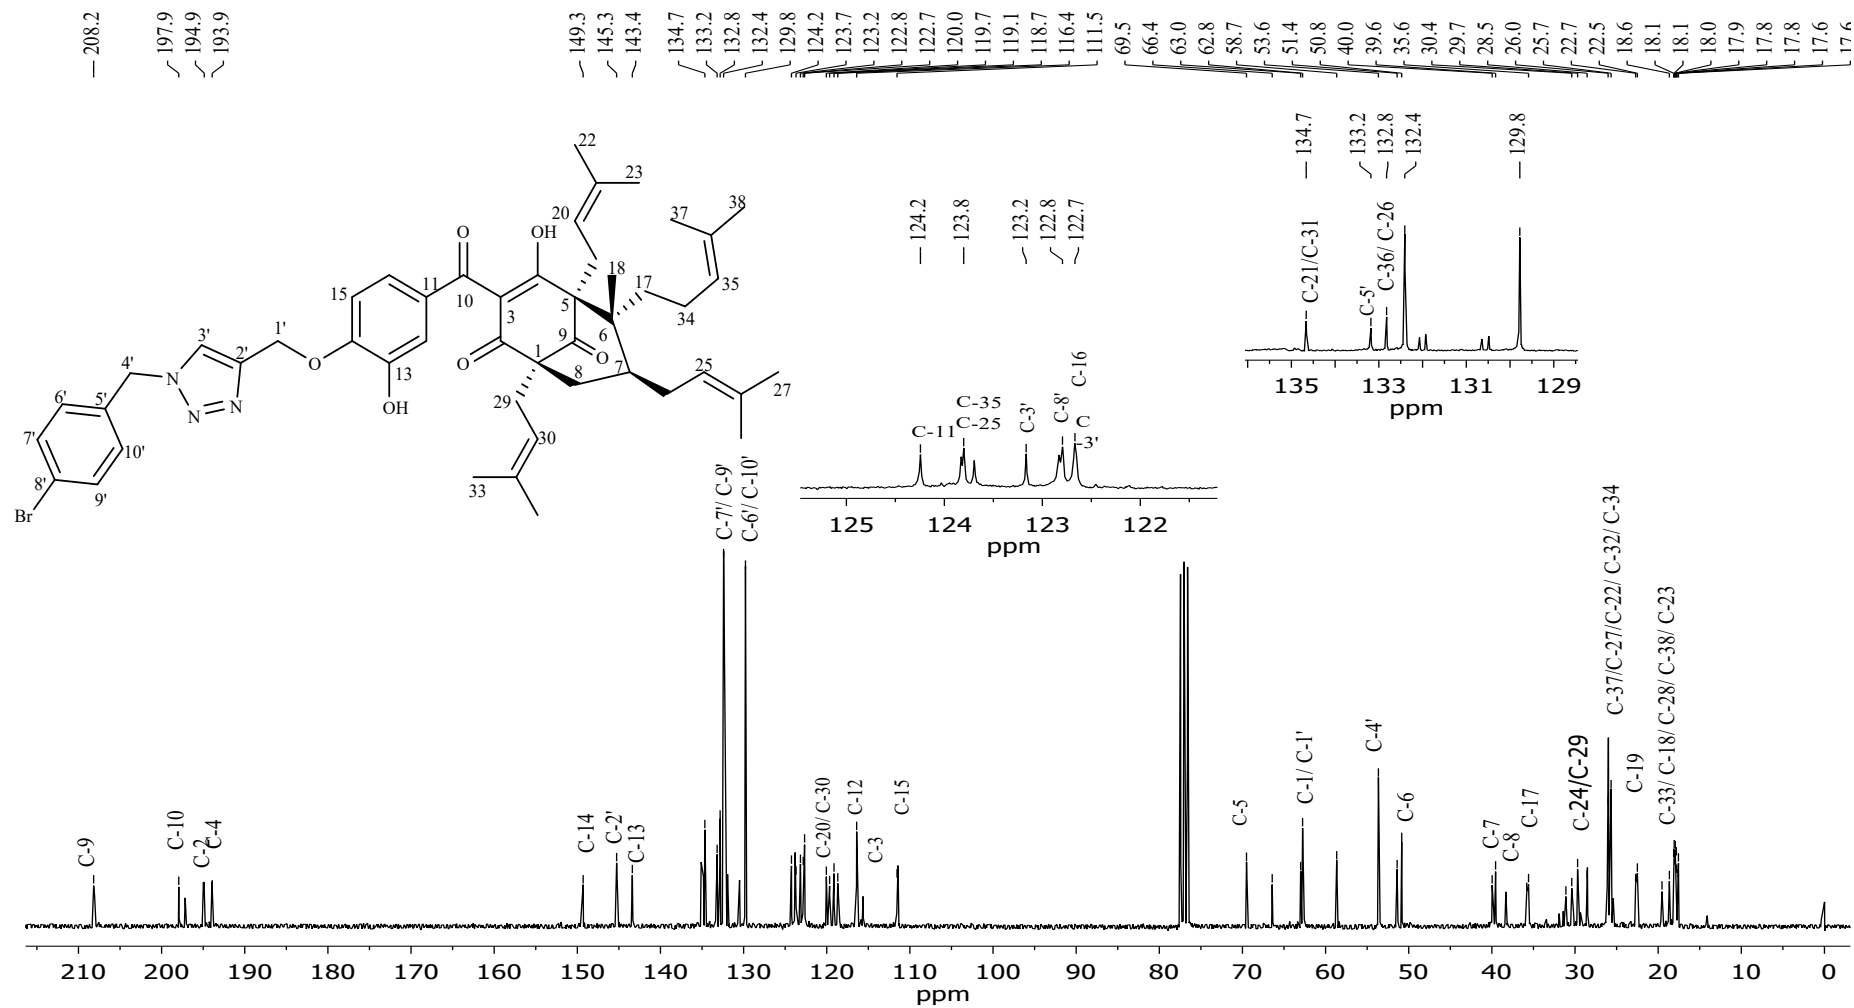

Fig. S27. <sup>13</sup>C NMR spectrum (75 MHz, CDCl<sub>3</sub>) of compound 6.

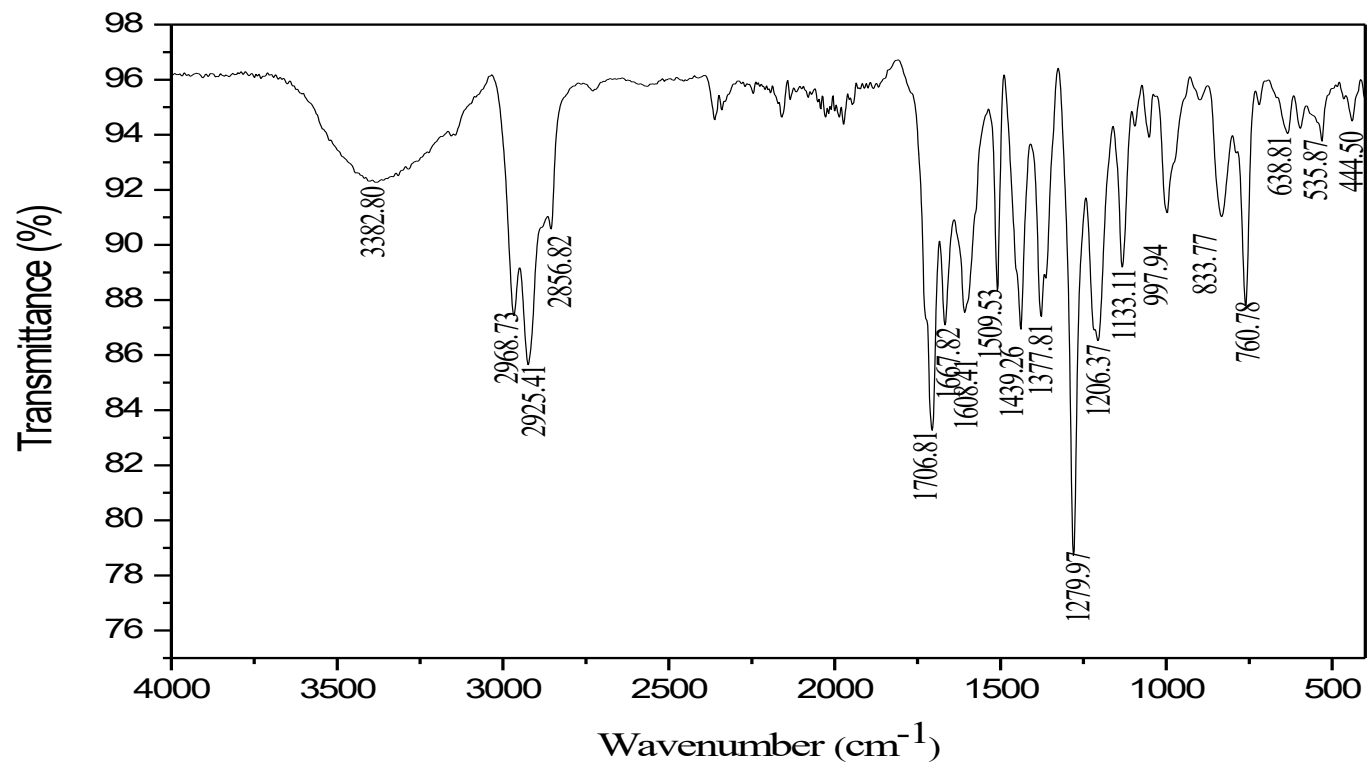

Fig. S28. FTIR (ATR) spectrum of compound 7.

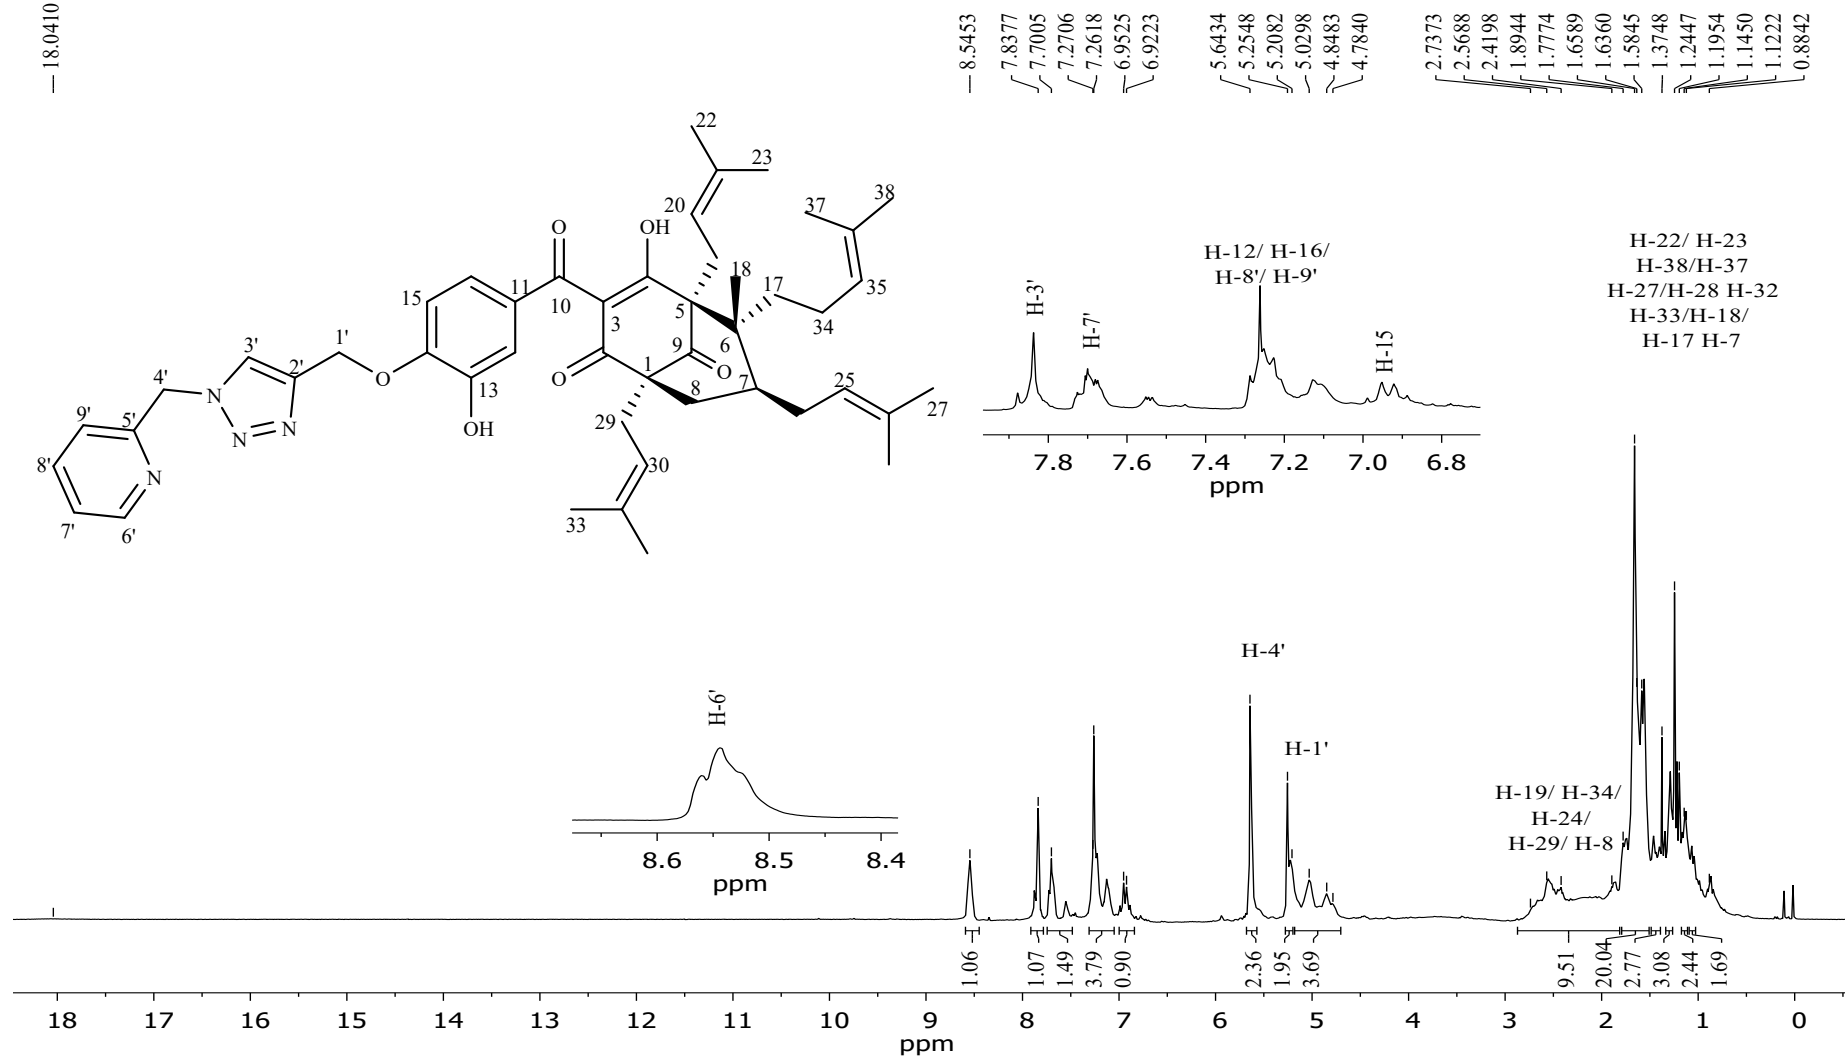

Fig. S29.  $^1\text{H}$  NMR spectrum (300 MHz,  $\text{CDCl}_3$ ) of compound 7.

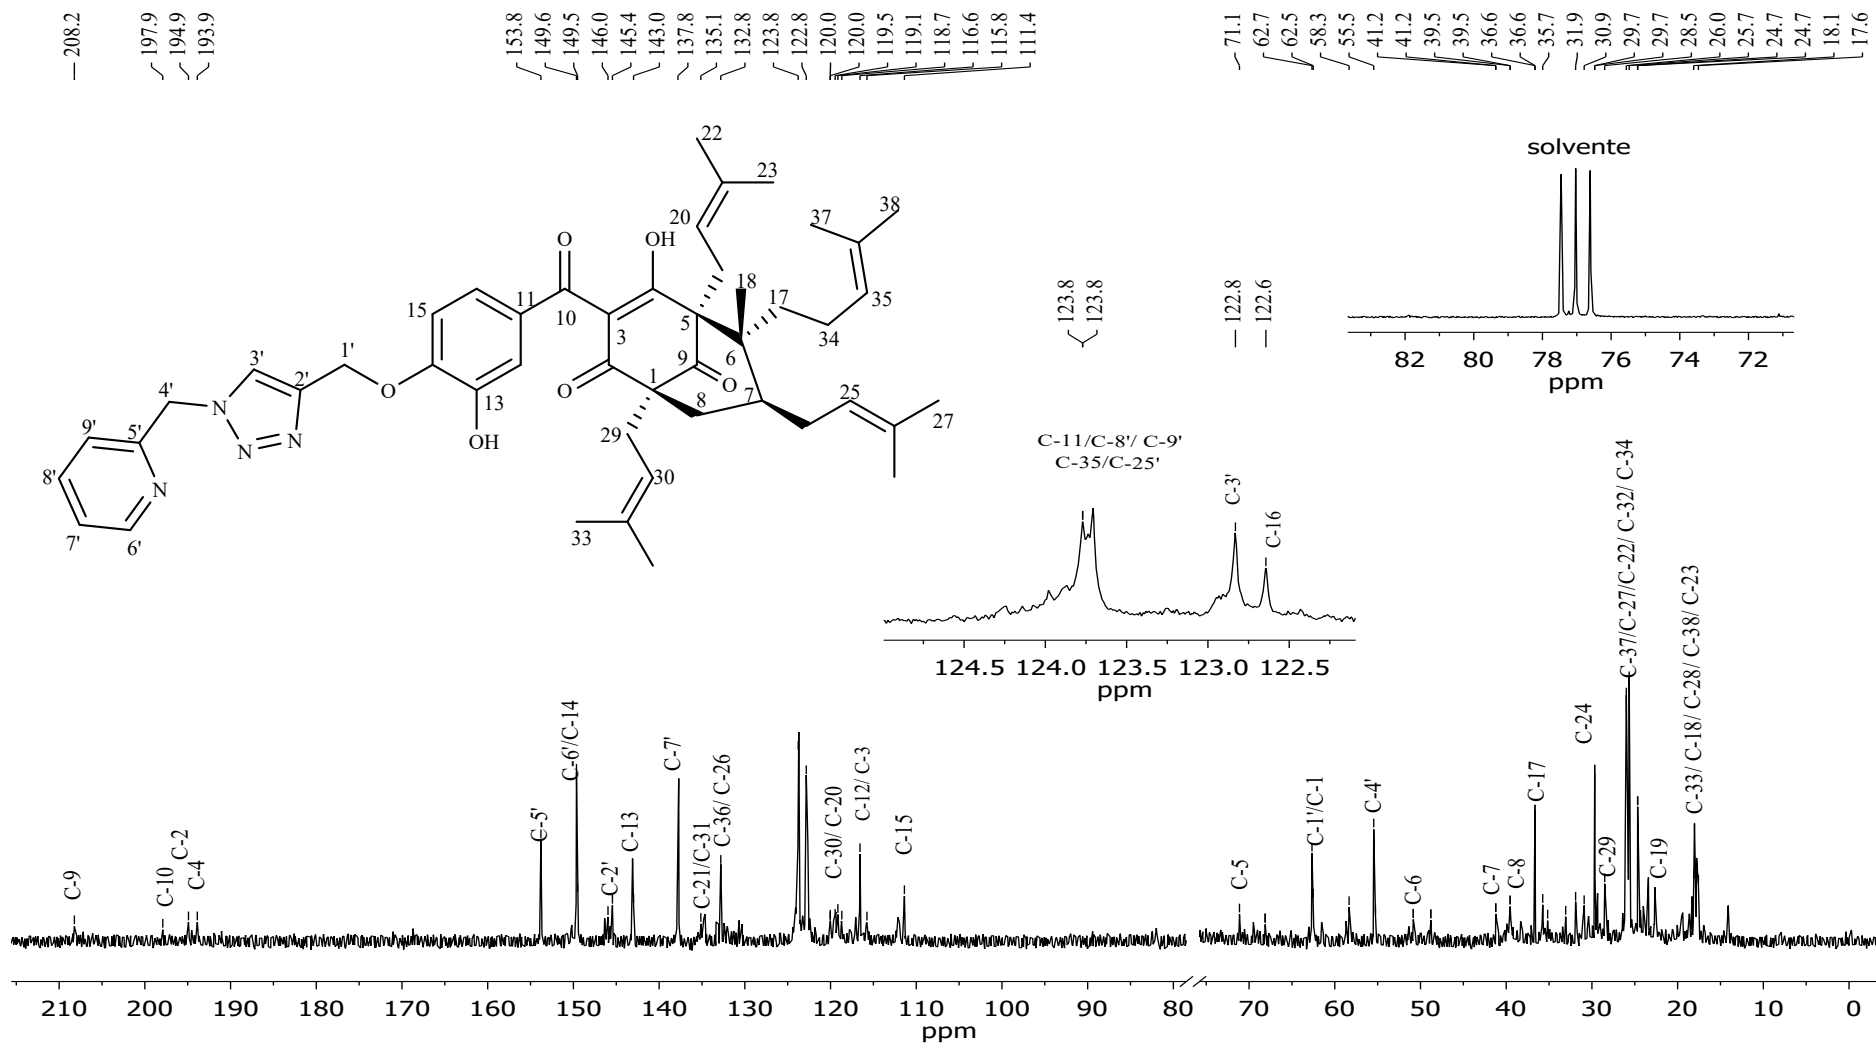

**Fig. S30.**  $^{13}\text{C}$  NMR spectrum (75 MHz,  $\text{CDCl}_3$ ) of compound 7.



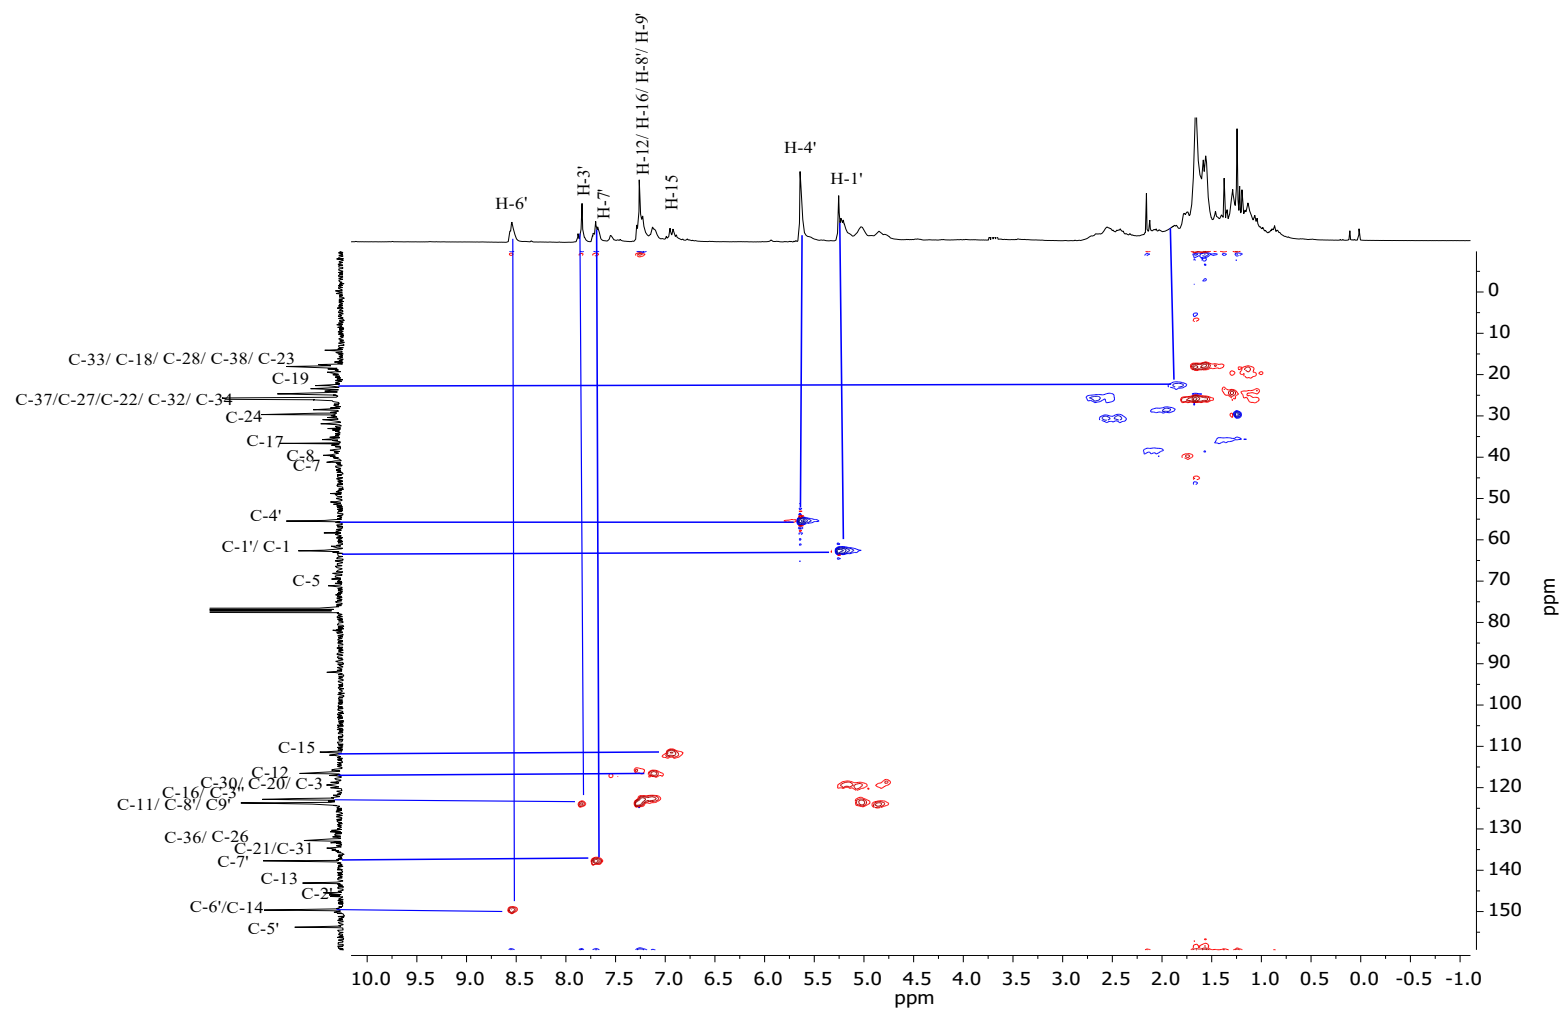

Fig. S31. HSQC  $^1\text{H}$ - $^{13}\text{C}$  NMR spectrum (300 MHz,  $\text{CDCl}_3$ ) of compound 7.

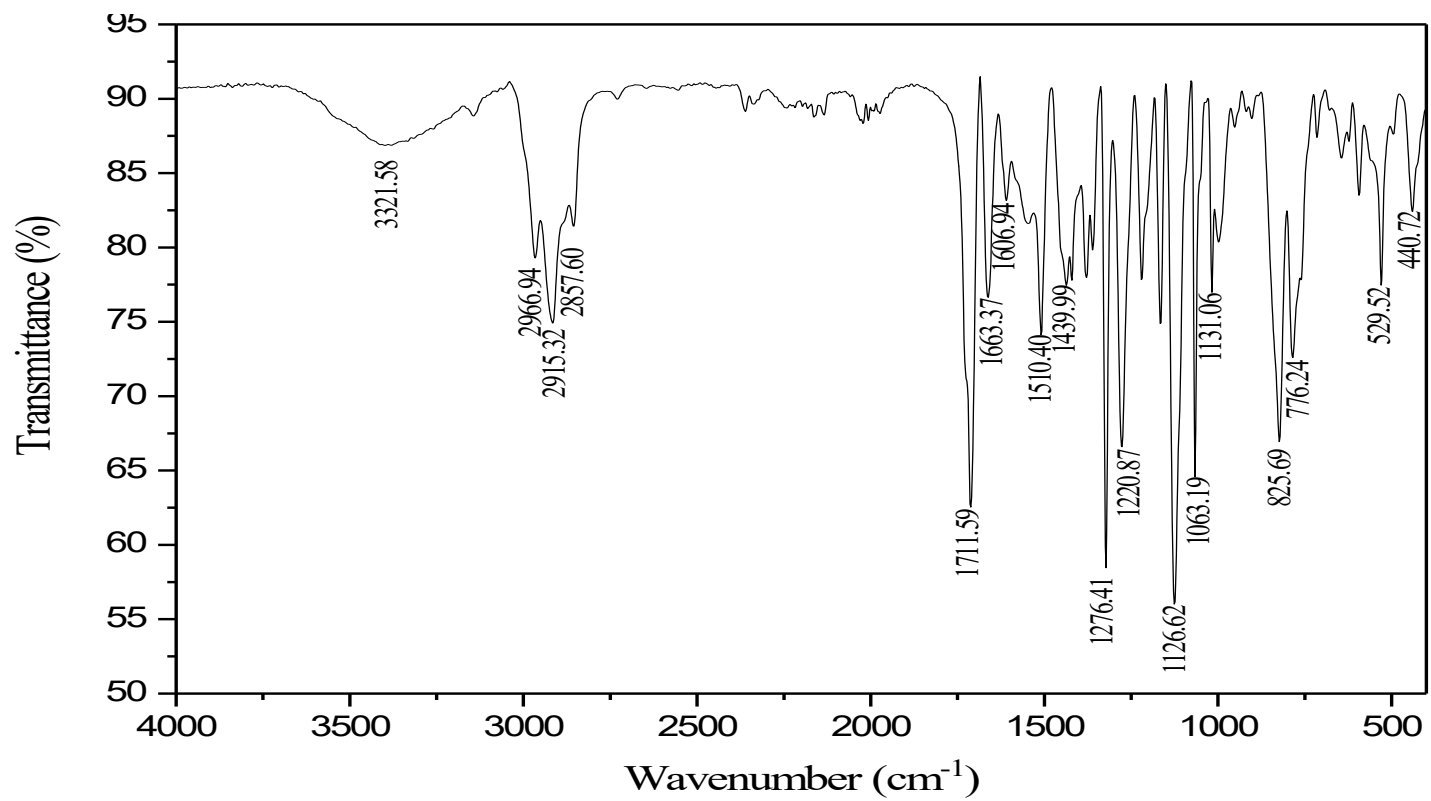

**Fig. S32.** FTIR (ATR) spectrum of compound **8**.

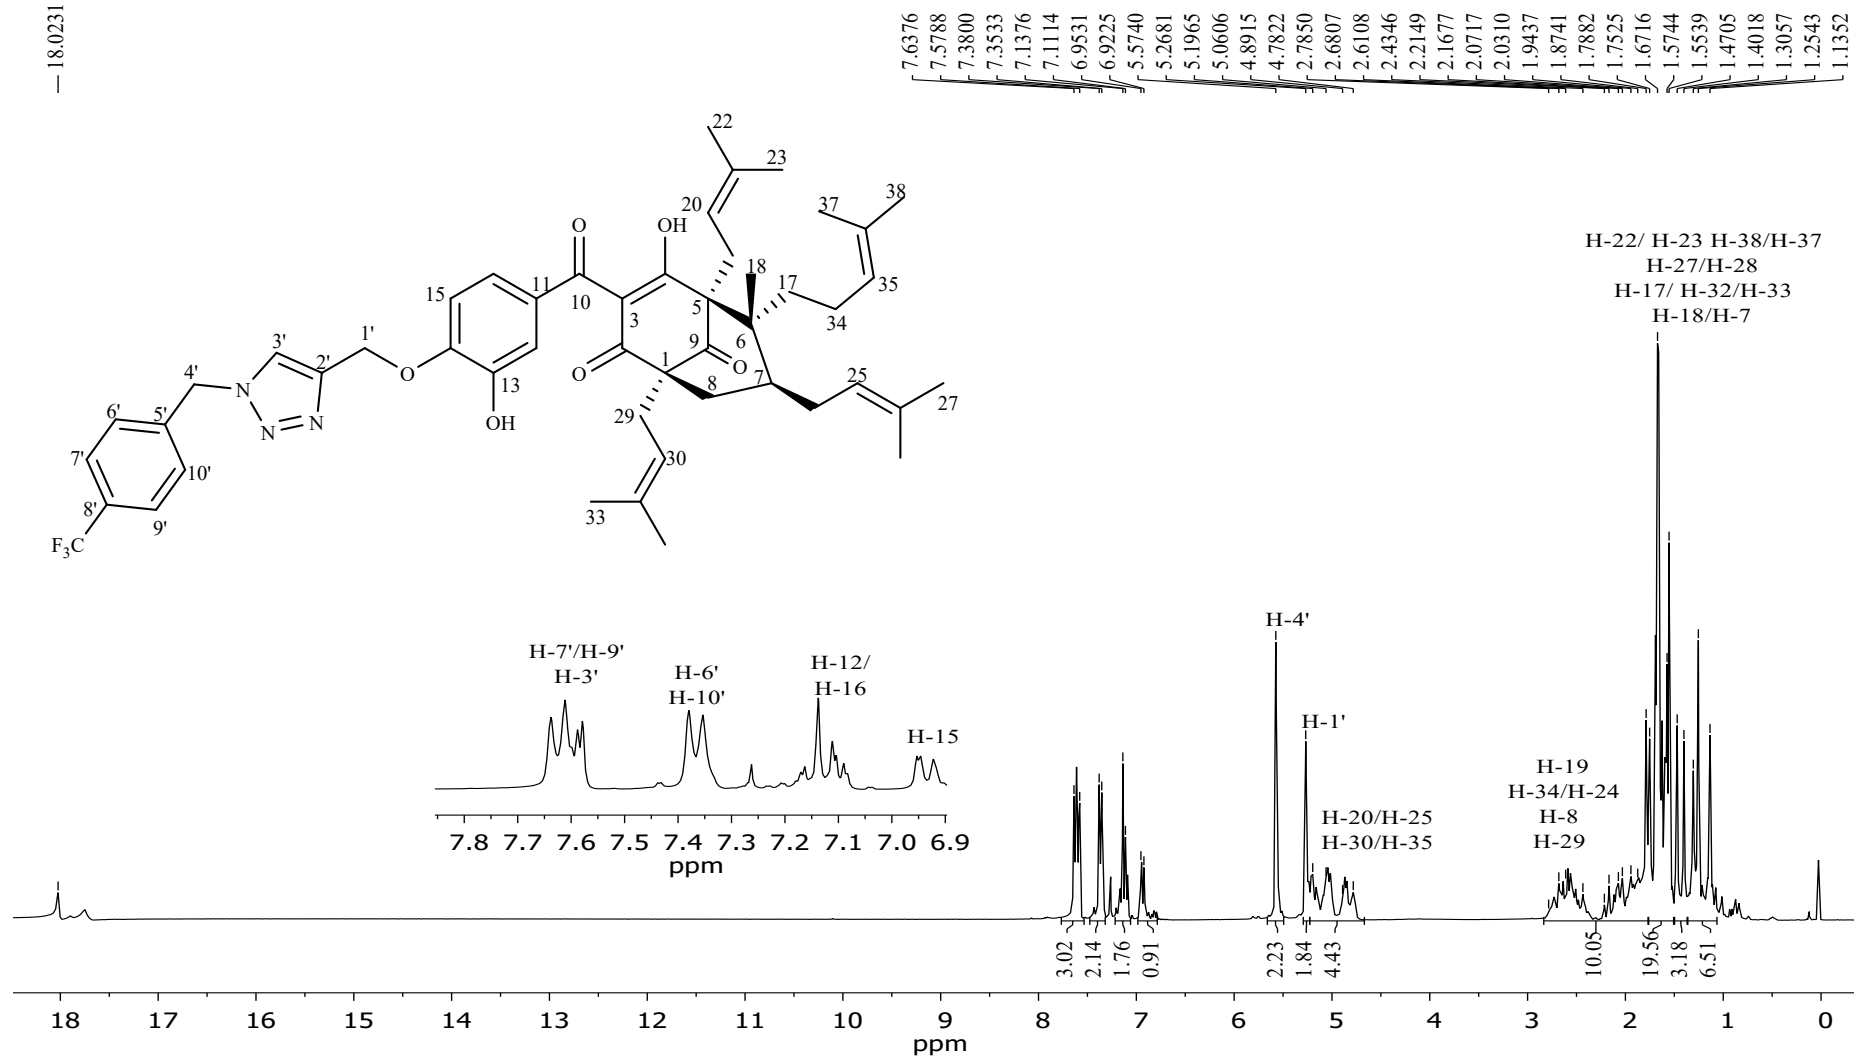

Fig. S33. <sup>1</sup>H NMR spectrum (300 MHz, CDCl<sub>3</sub>) of compound **8**.

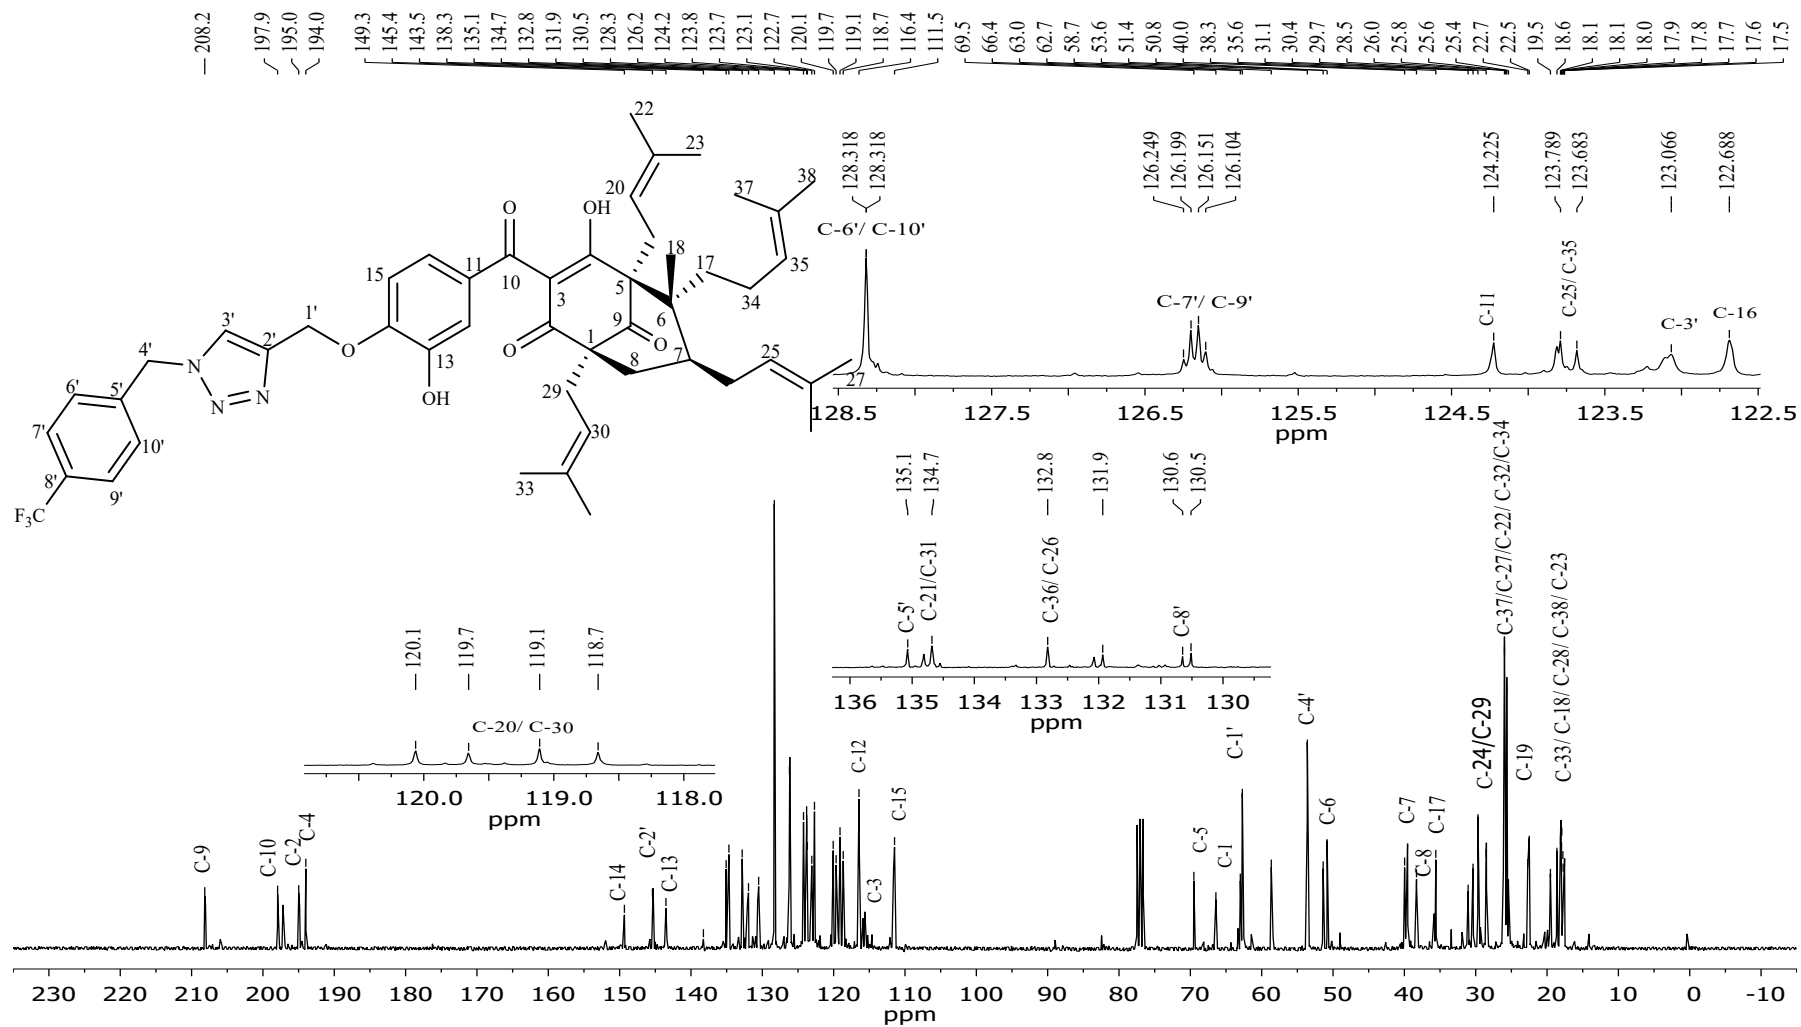

**Fig. S34.** <sup>13</sup>C NMR spectrum (75 MHz, CDCl<sub>3</sub>) of compound **8**.

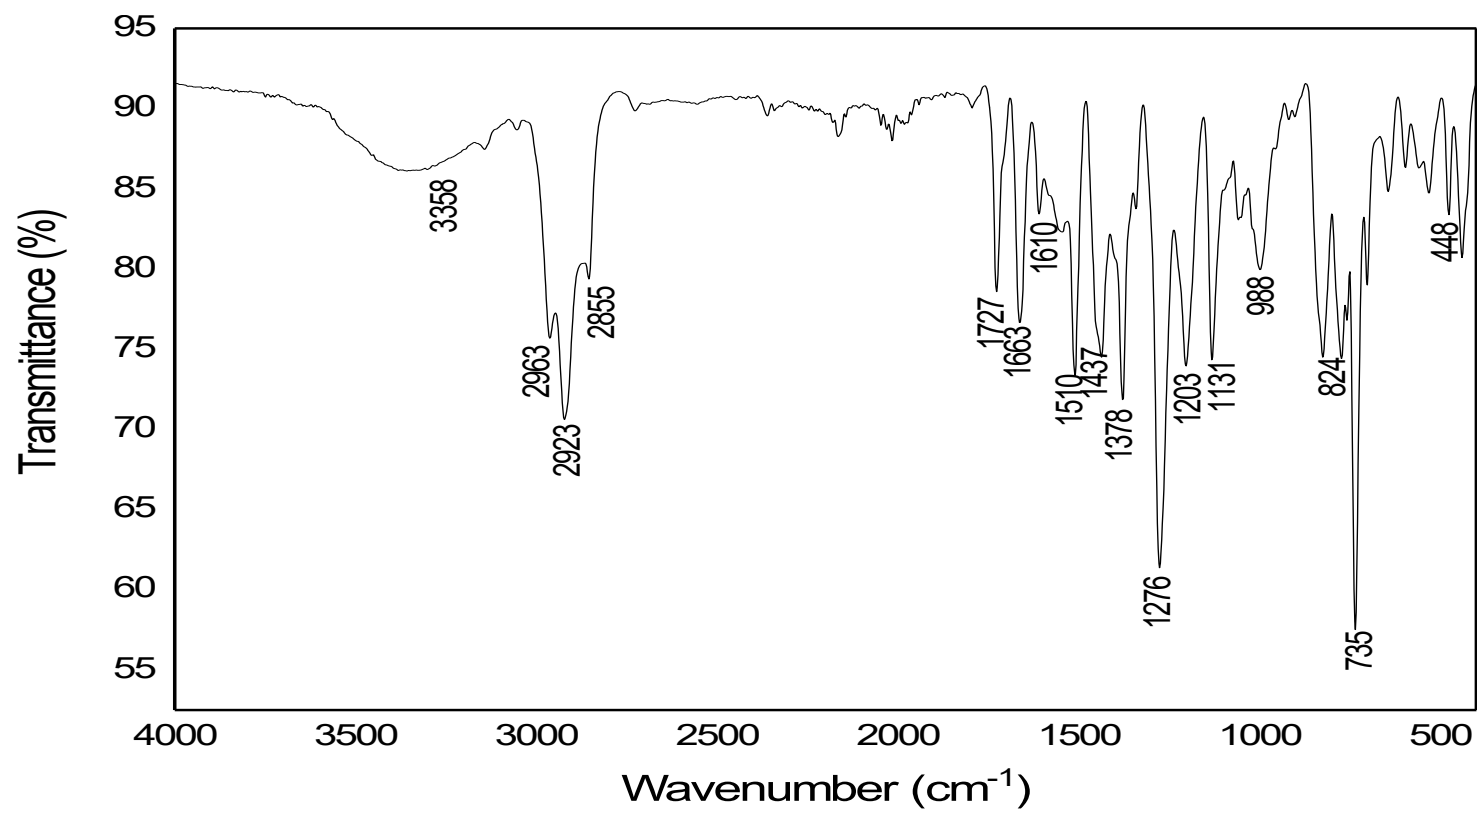

Fig. S35. FTIR (ATR) spectrum of compound 9.

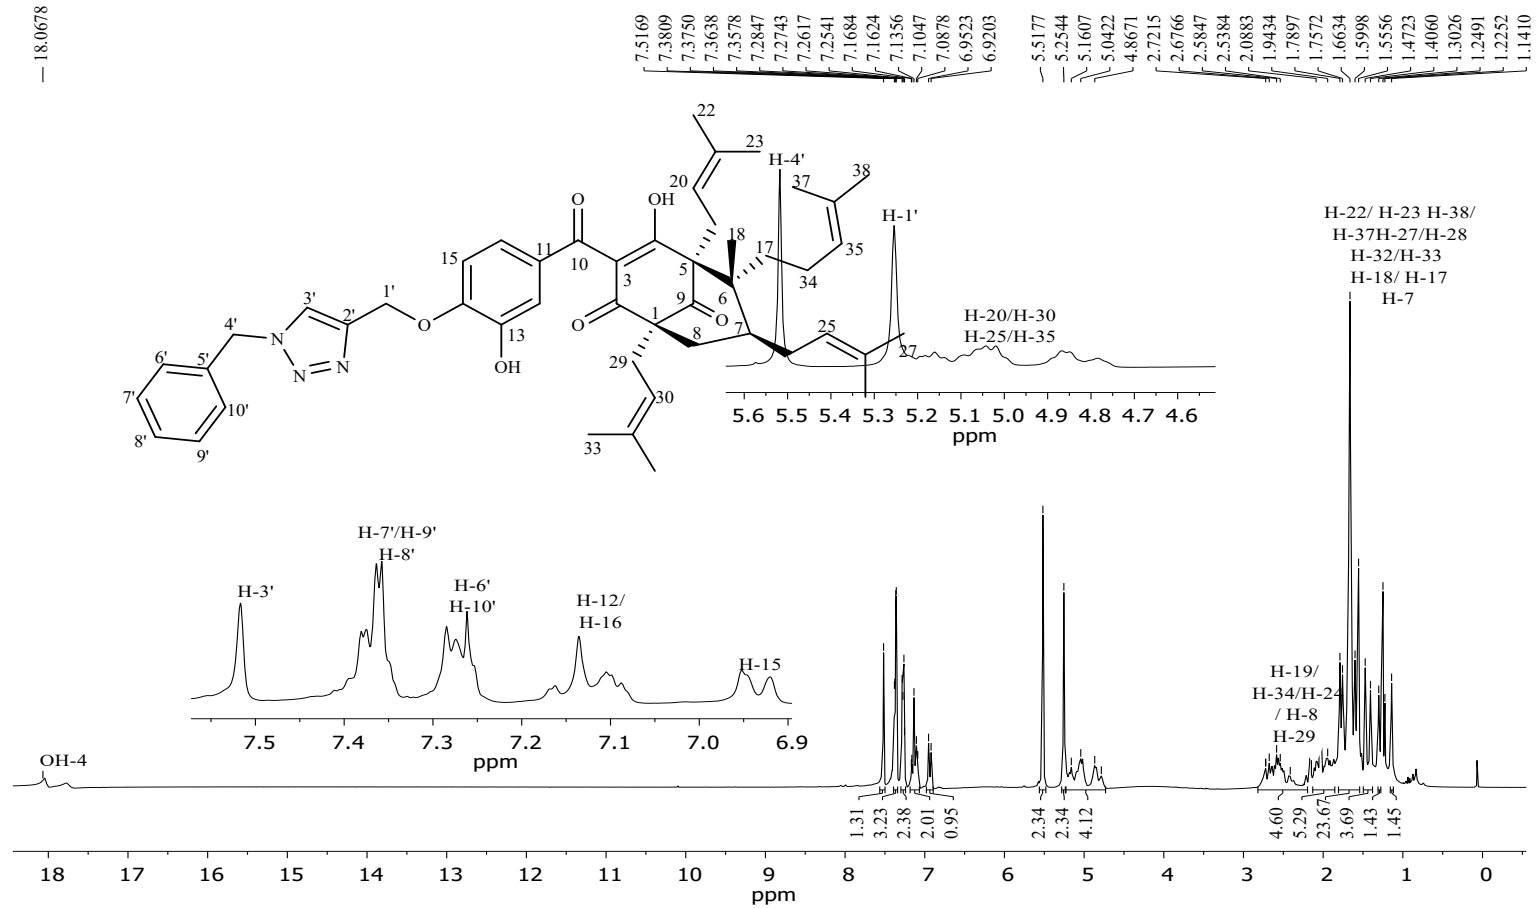

Fig. S36.  $^1\text{H}$  NMR spectrum (300 MHz,  $\text{CDCl}_3$ ) of compound 9.

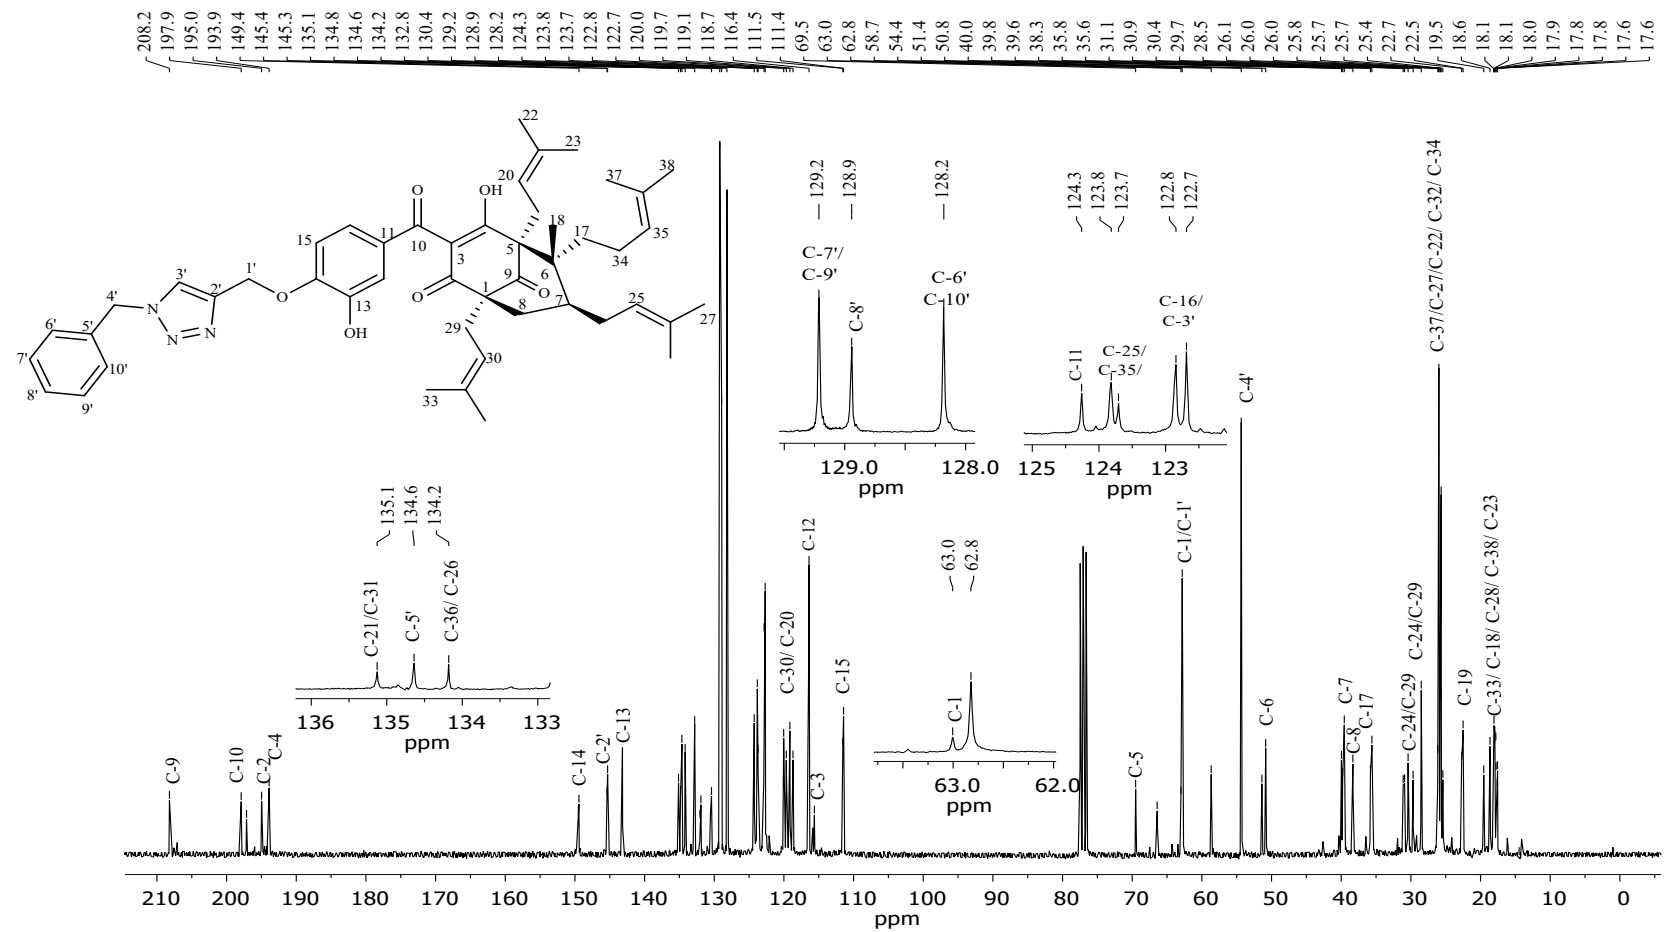

Fig. S37. <sup>13</sup>C NMR spectrum (75 MHz, CDCl<sub>3</sub>) of compound 9.

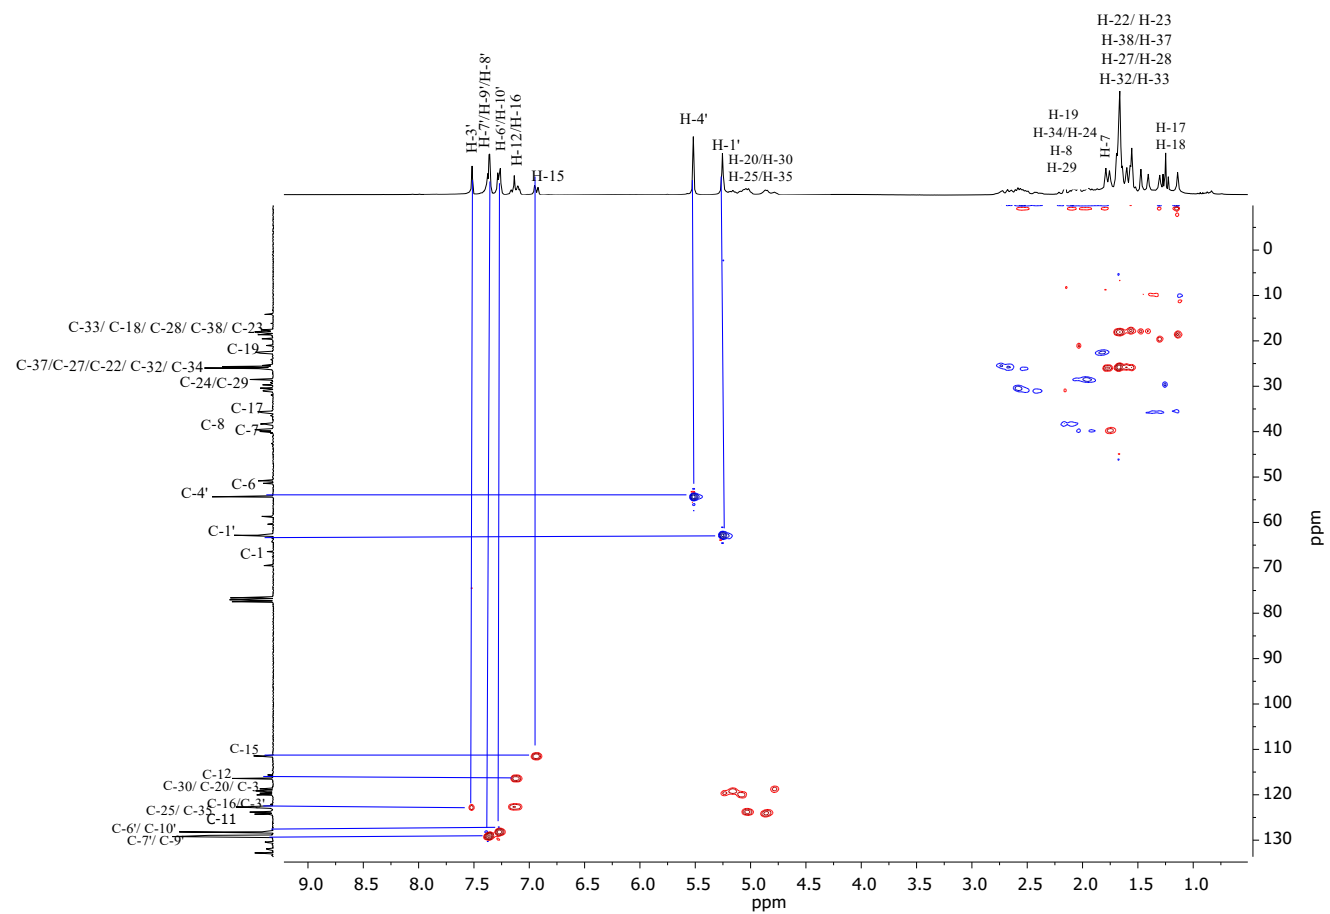

**Fig. S38.** HSQC  $^1\text{H}$ - $^{13}\text{C}$  NMR spectrum (300 MHz,  $\text{CDCl}_3$ ) of compound **9**.



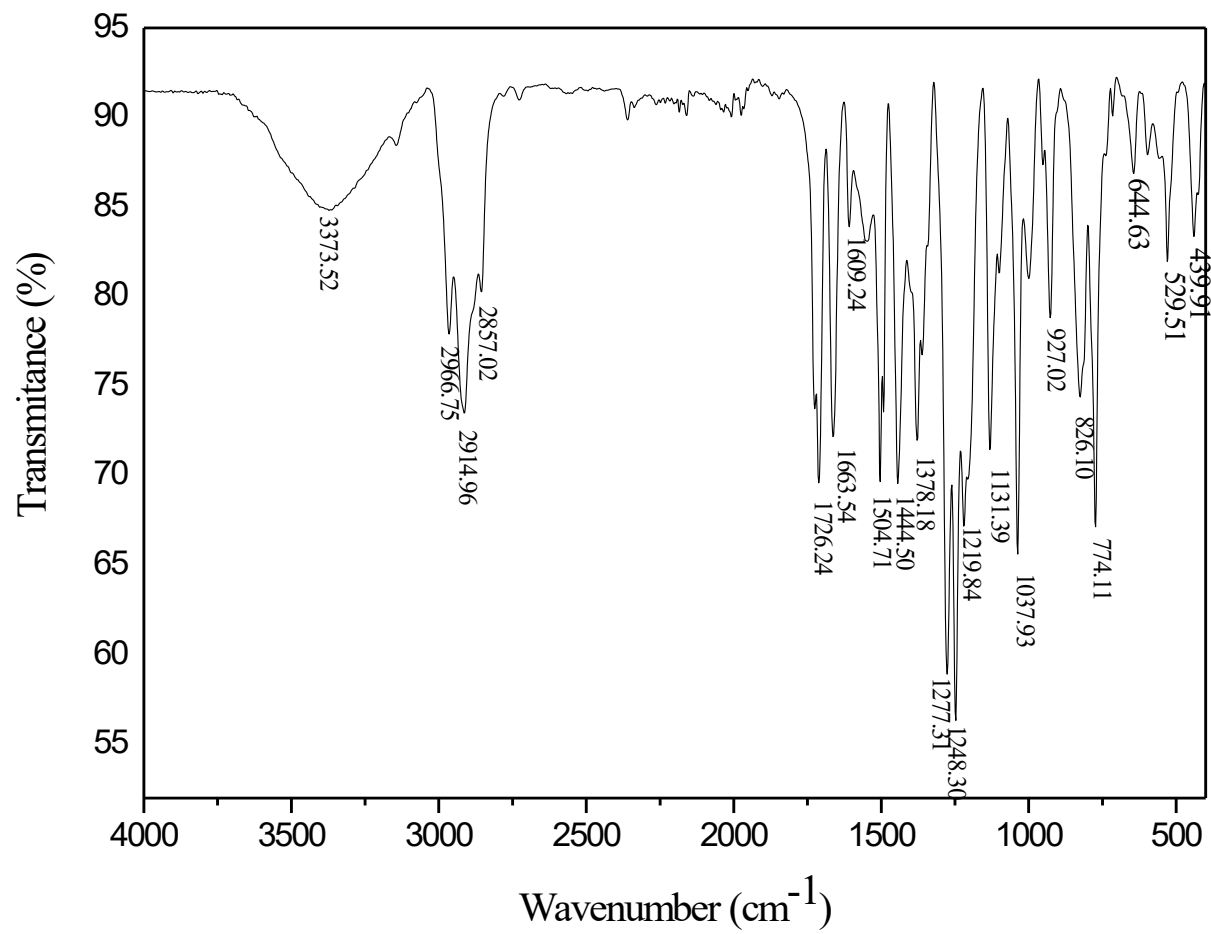

**Fig. S39.** FTIR (ATR) spectrum of compound **10**.

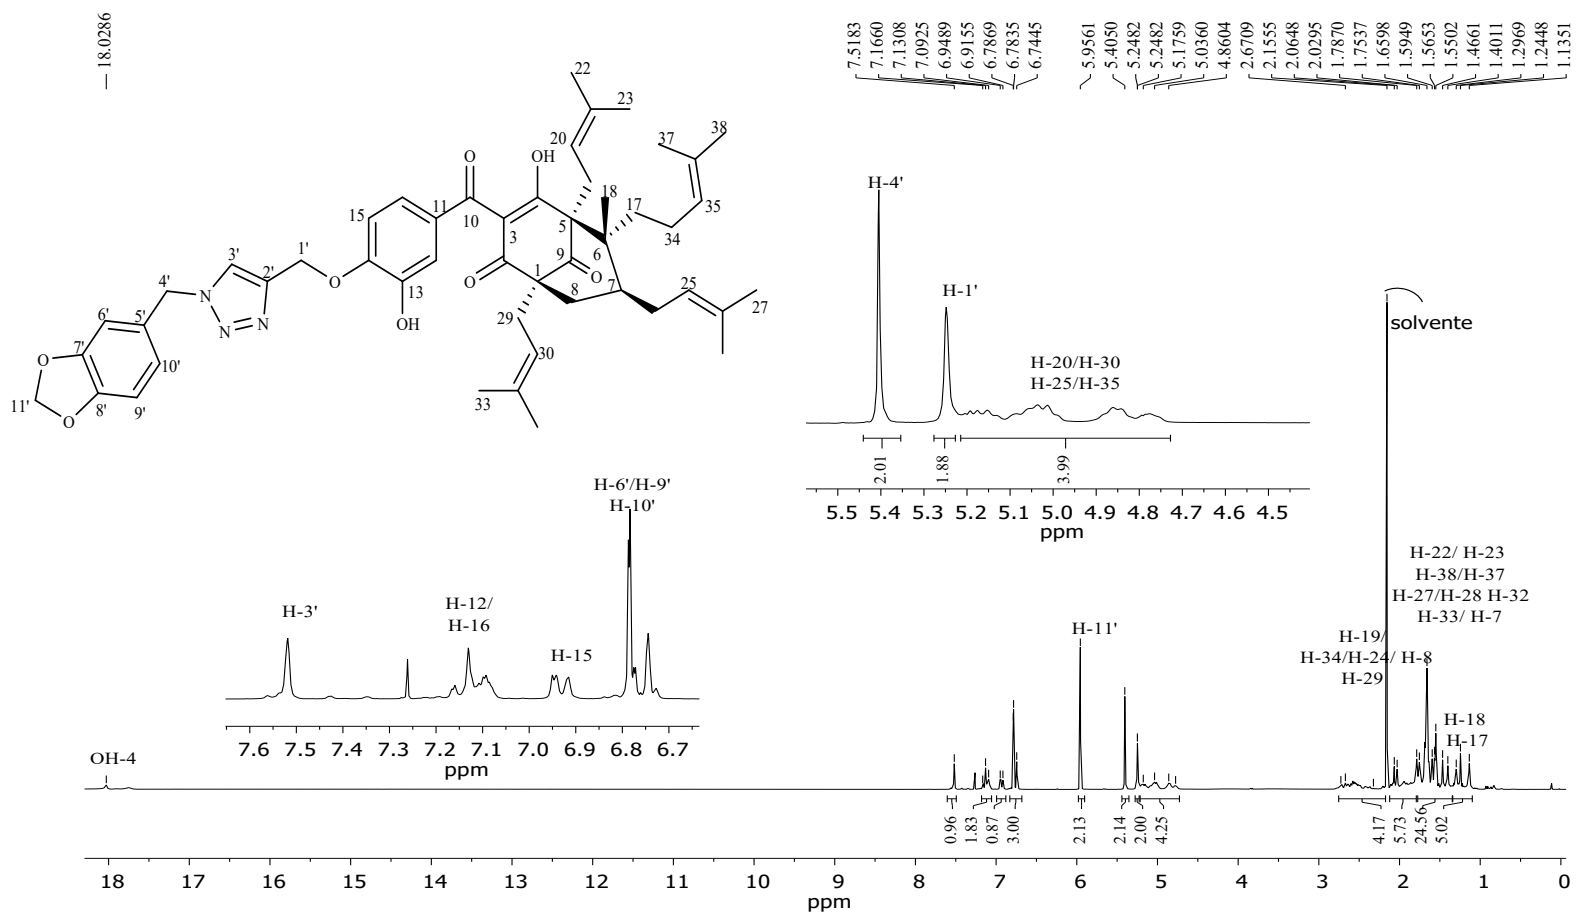

**Fig. S40.**  $^1\text{H}$  NMR spectrum (300 MHz,  $\text{CDCl}_3$ ) of compound 10.

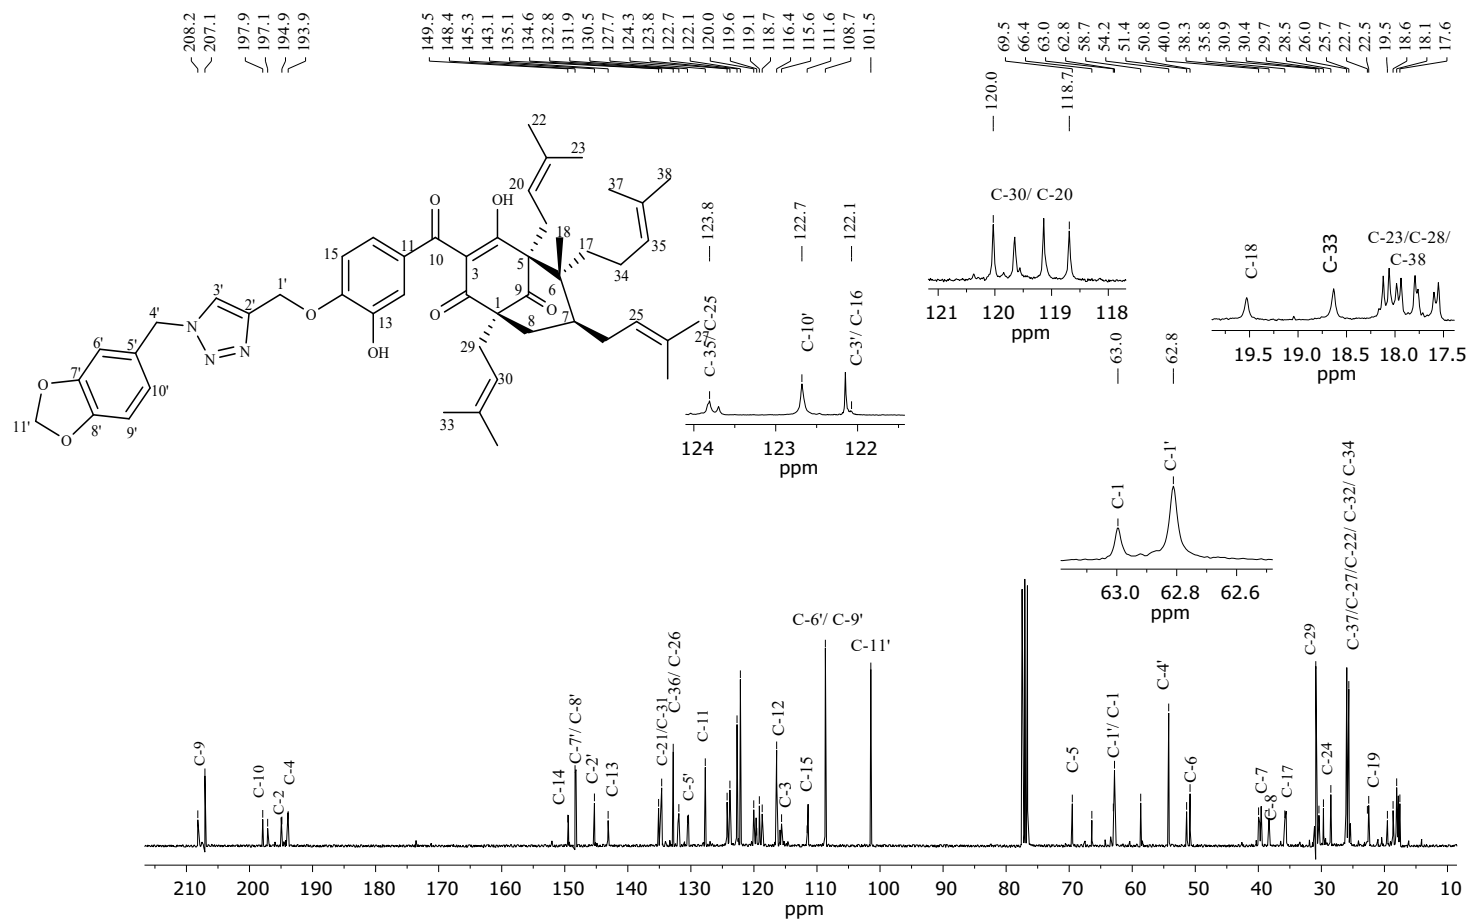

**Fig. S41.** <sup>13</sup>C NMR spectrum (75 MHz, CDCl<sub>3</sub>) of compound 10.

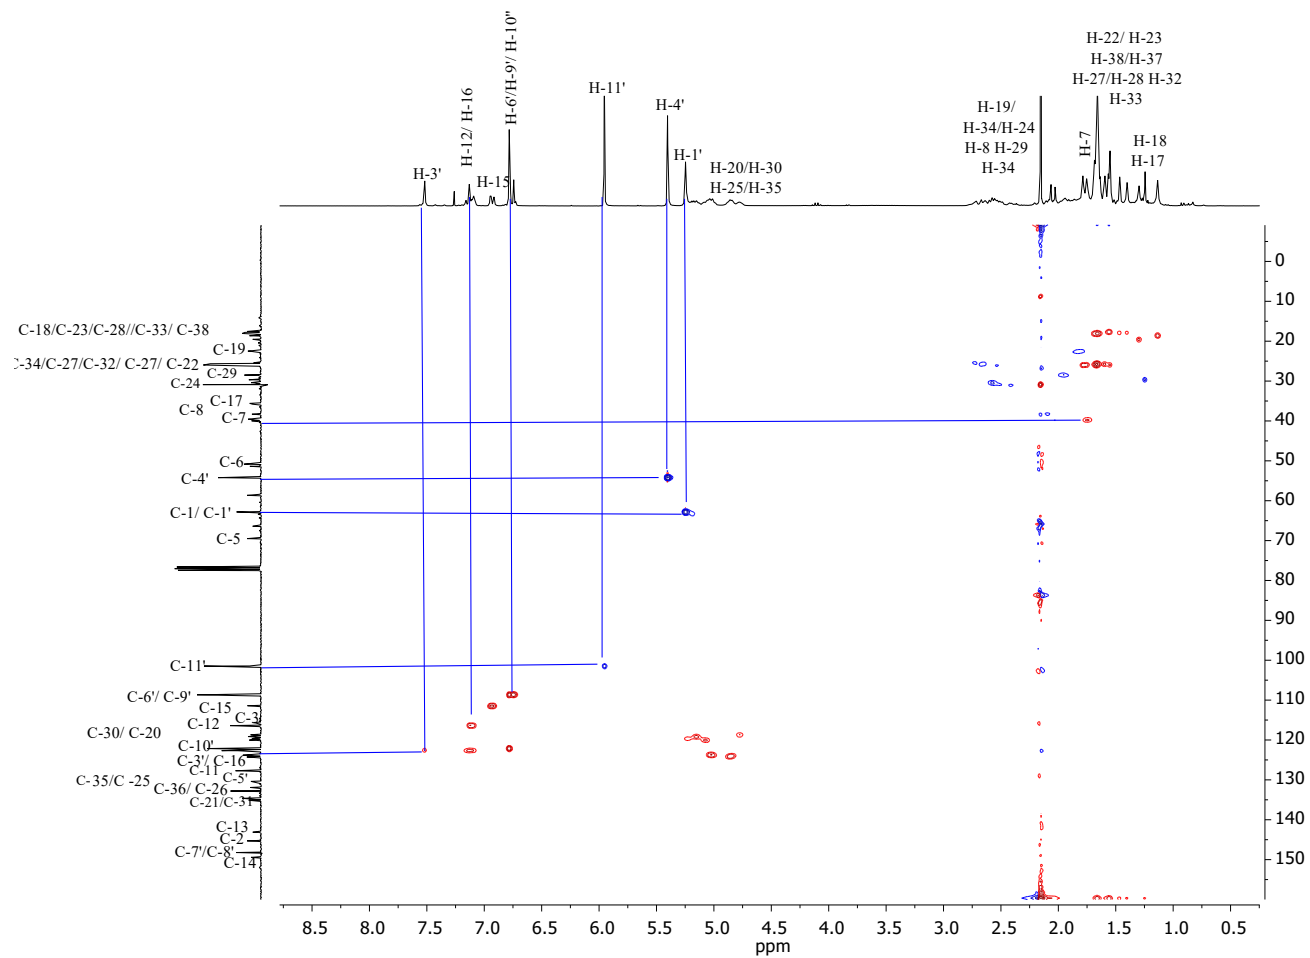

Fig. S42. HSQC  $^1\text{H}$ - $^{13}\text{C}$  NMR spectrum (300 MHz,  $\text{CDCl}_3$ ) of compound **10**.

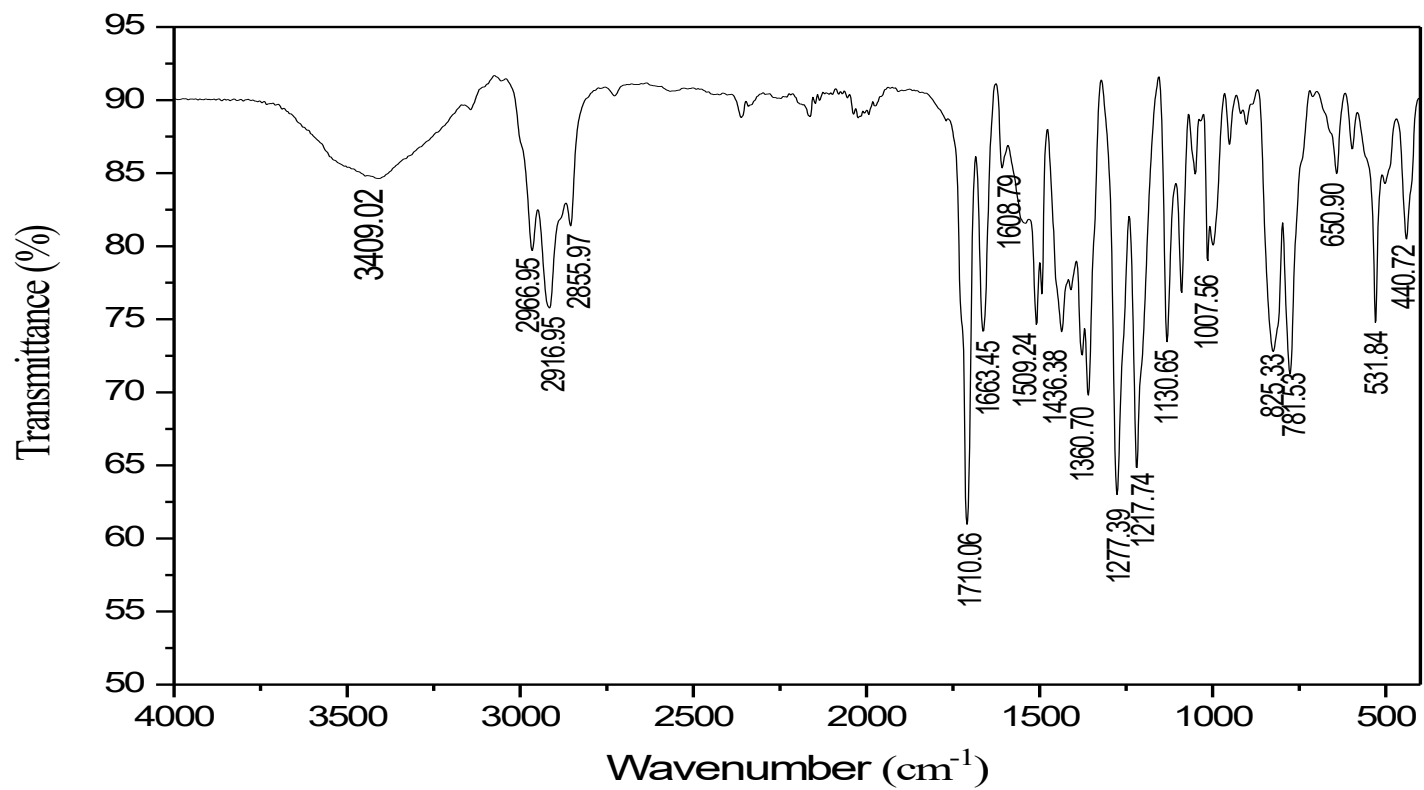

**Fig. S43.** FTIR (ATR) spectrum of compound 11.

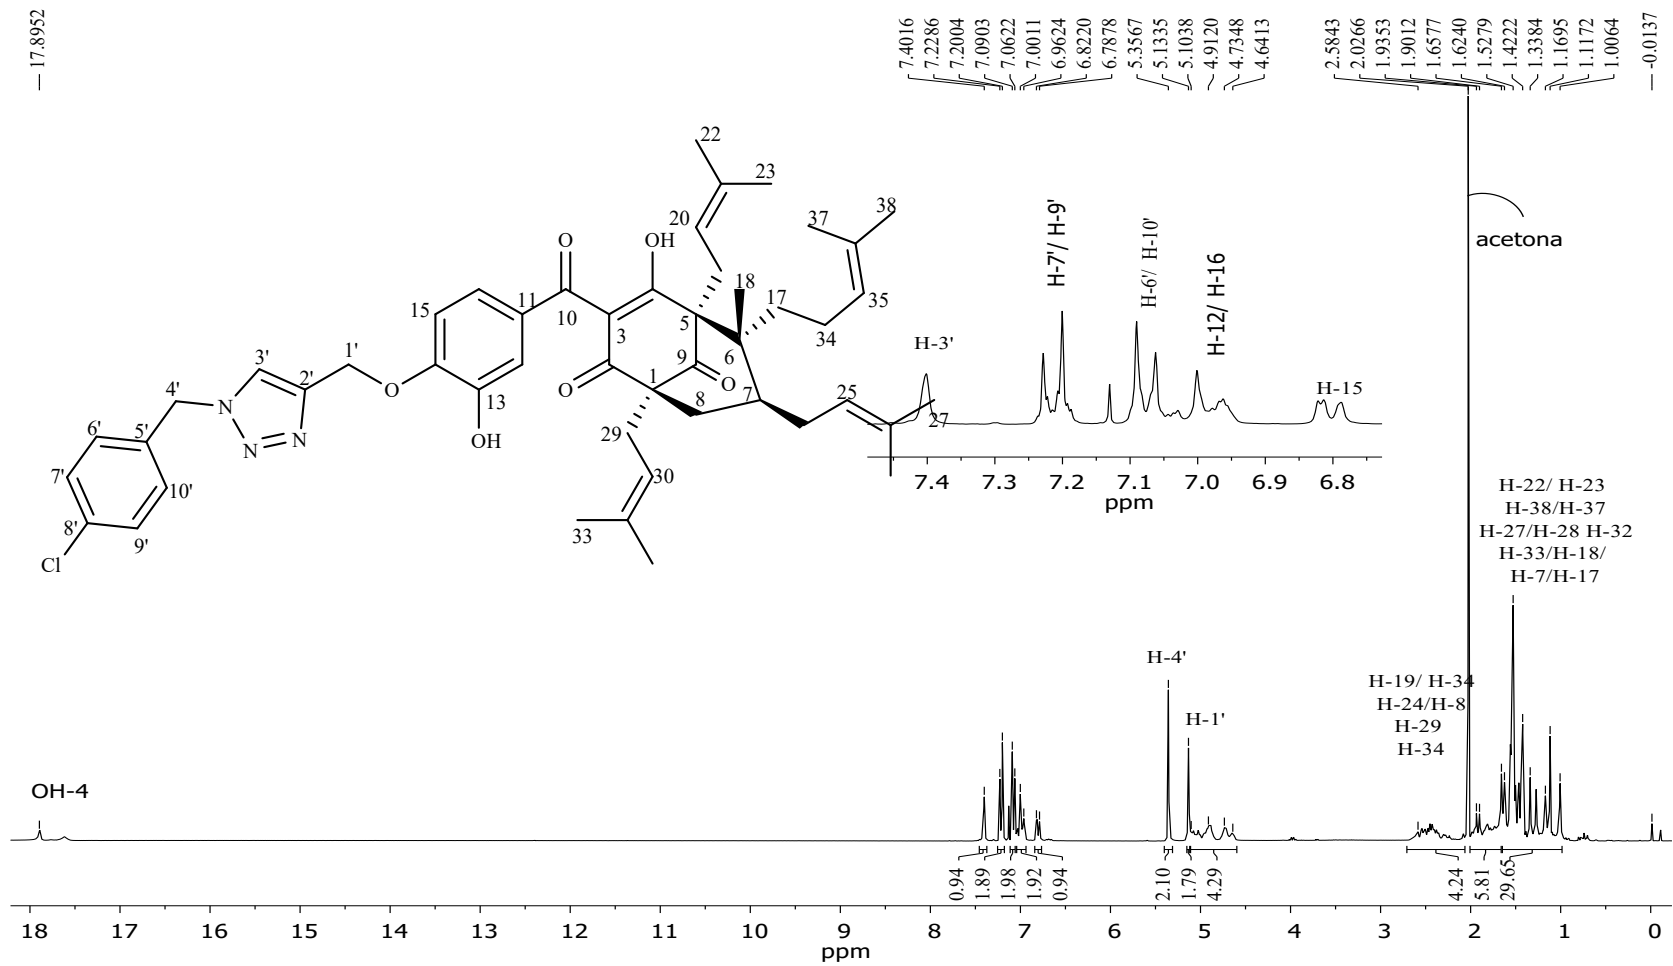

Fig. S44. <sup>1</sup>H NMR spectrum (300 MHz, CDCl<sub>3</sub>) of compound 11.

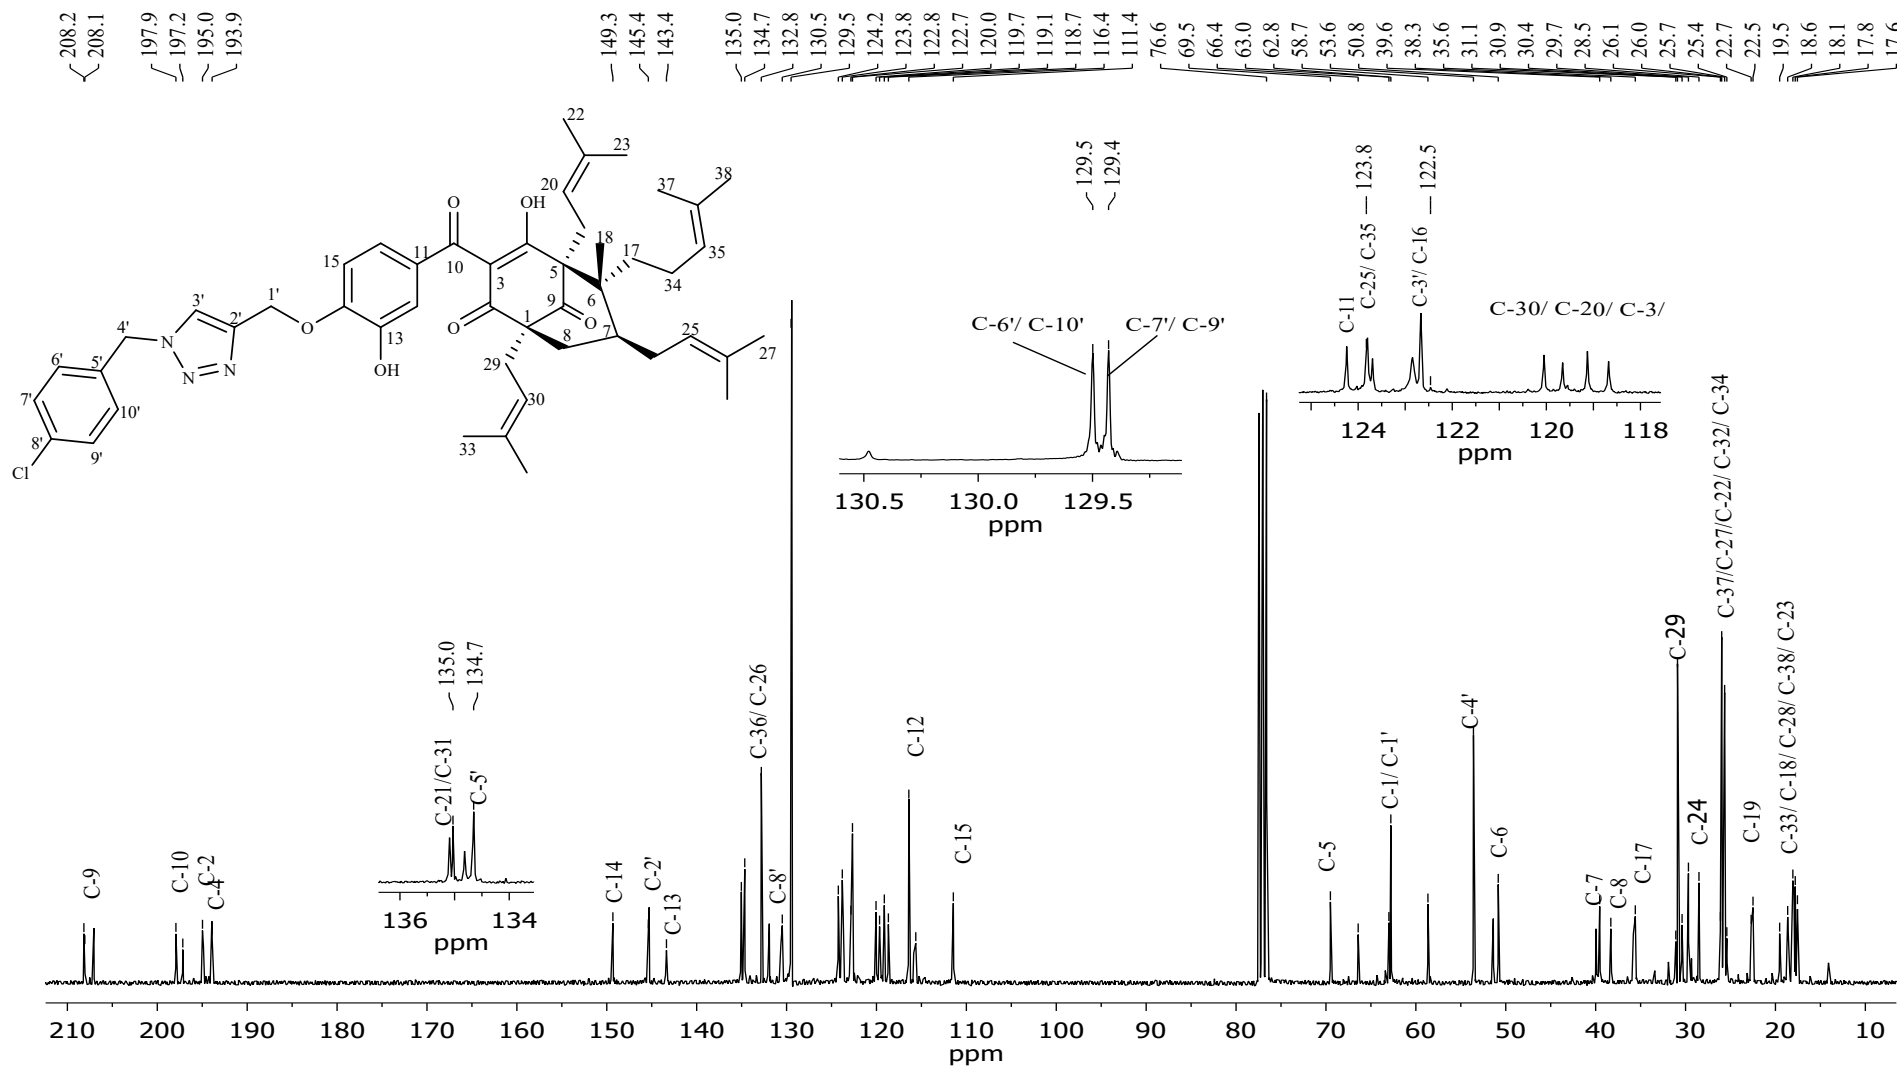

**Fig. S45.** <sup>13</sup>C NMR spectrum (75 MHz, CDCl<sub>3</sub>) of compound 11.

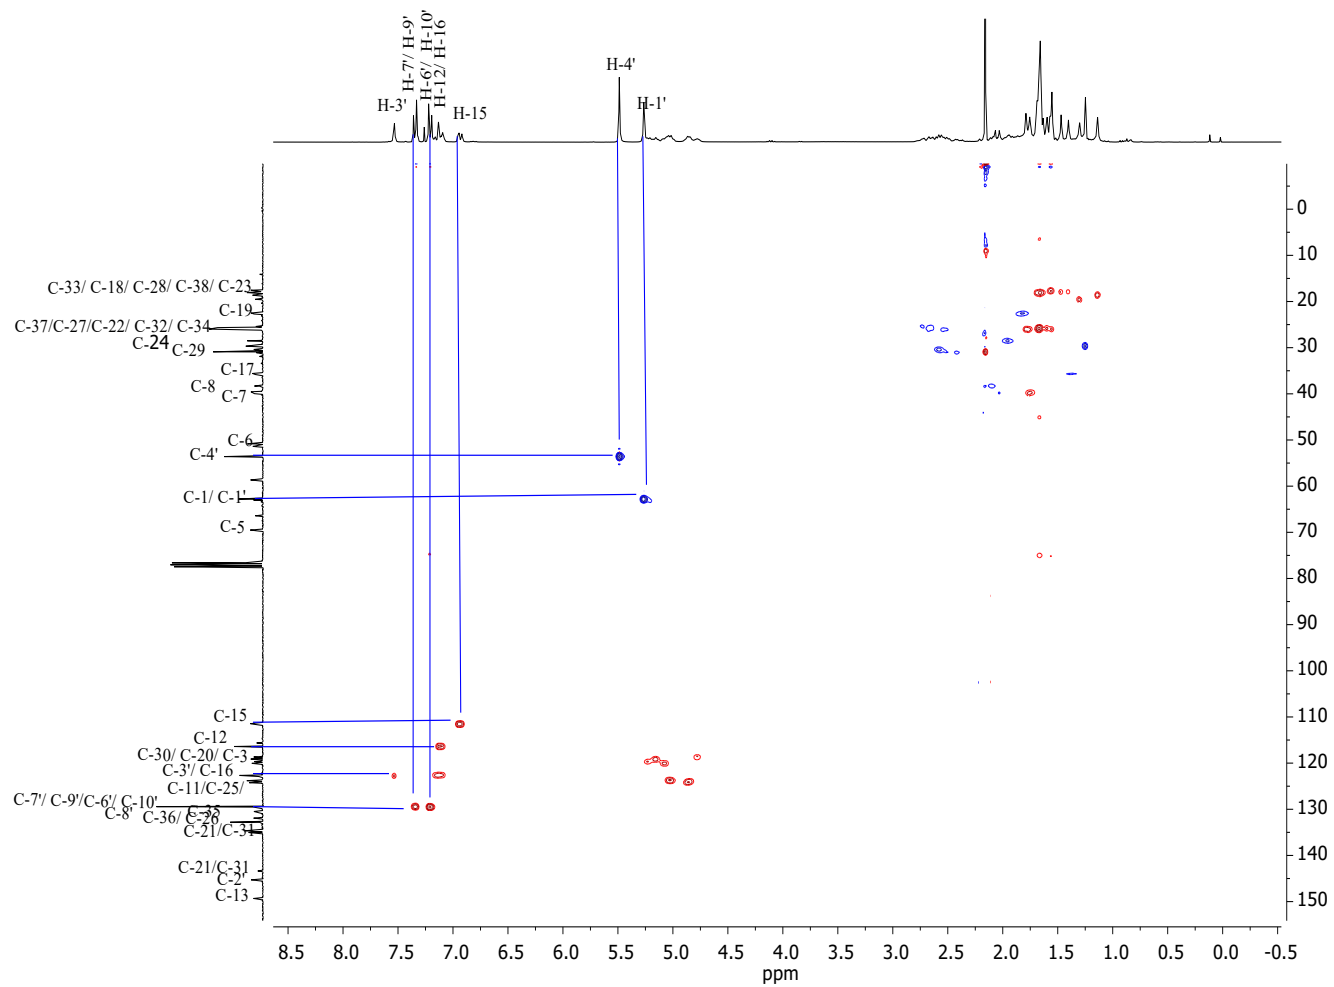

**Fig. S46.** HSQC  $^1\text{H}$ - $^{13}\text{C}$  NMR spectrum (300 MHz,  $\text{CDCl}_3$ ) of compound 11.



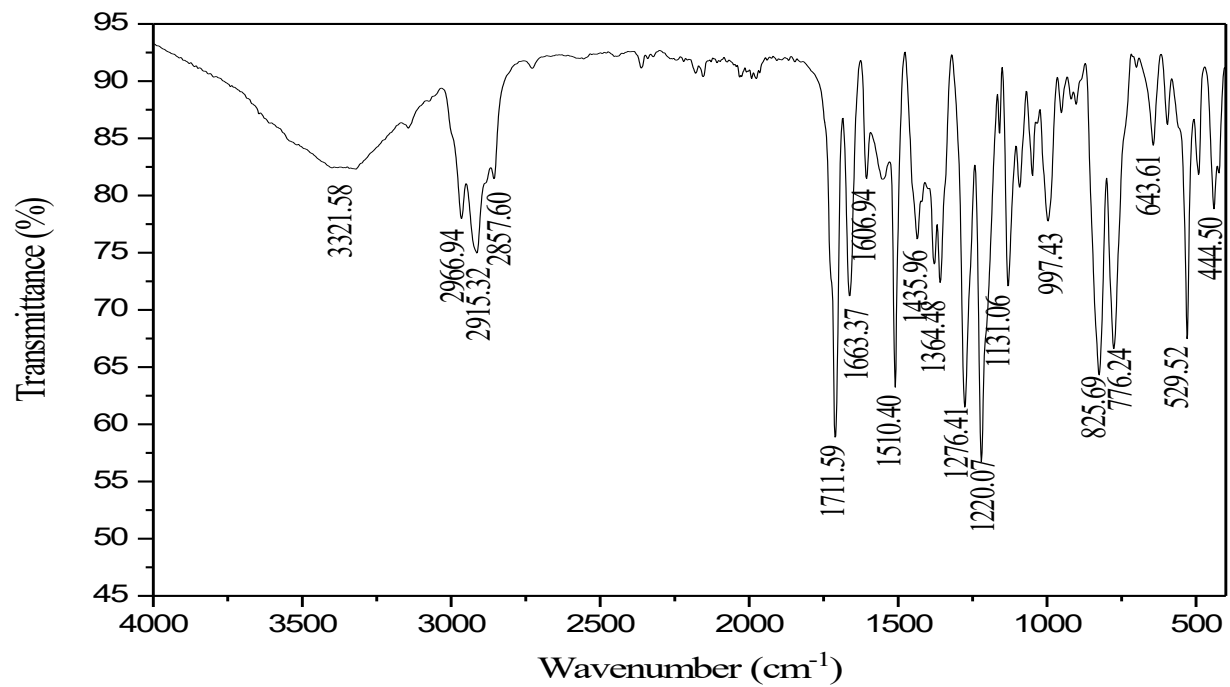

**Fig. S47.** FTIR (ATR) spectrum of compound 12.

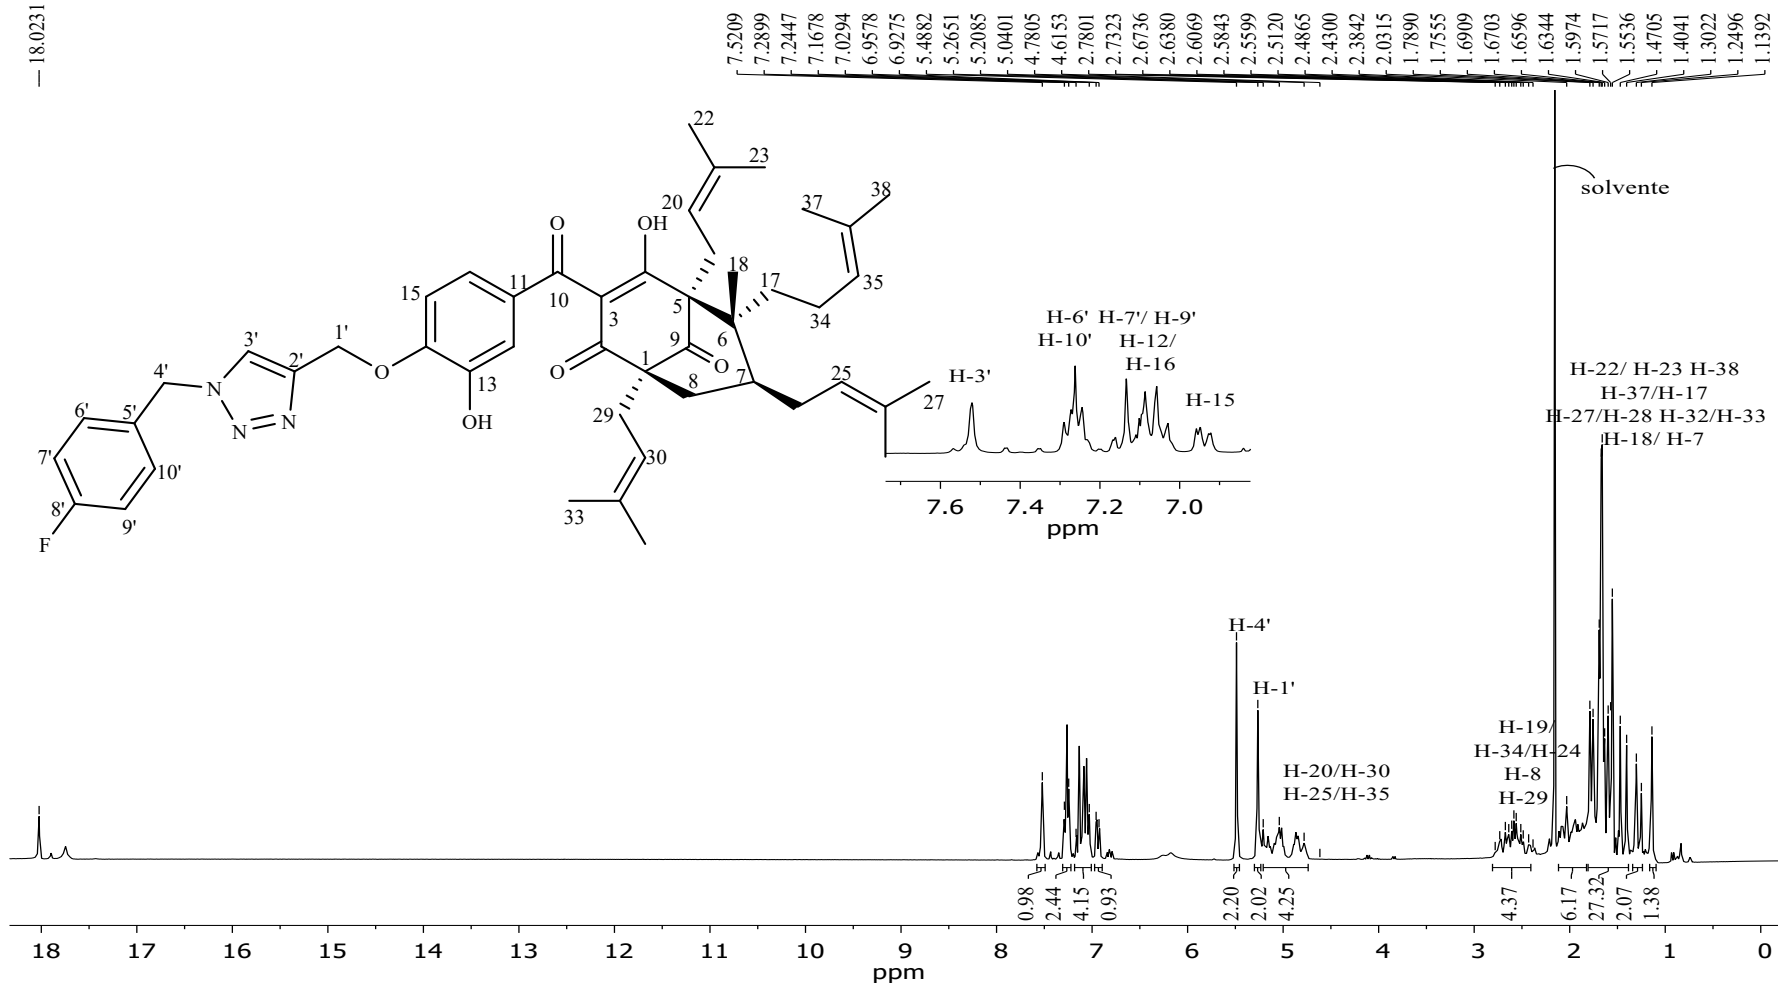

Fig. S48.  $^1\text{H}$  NMR spectrum (300 MHz,  $\text{CDCl}_3$ ) of compound 12.

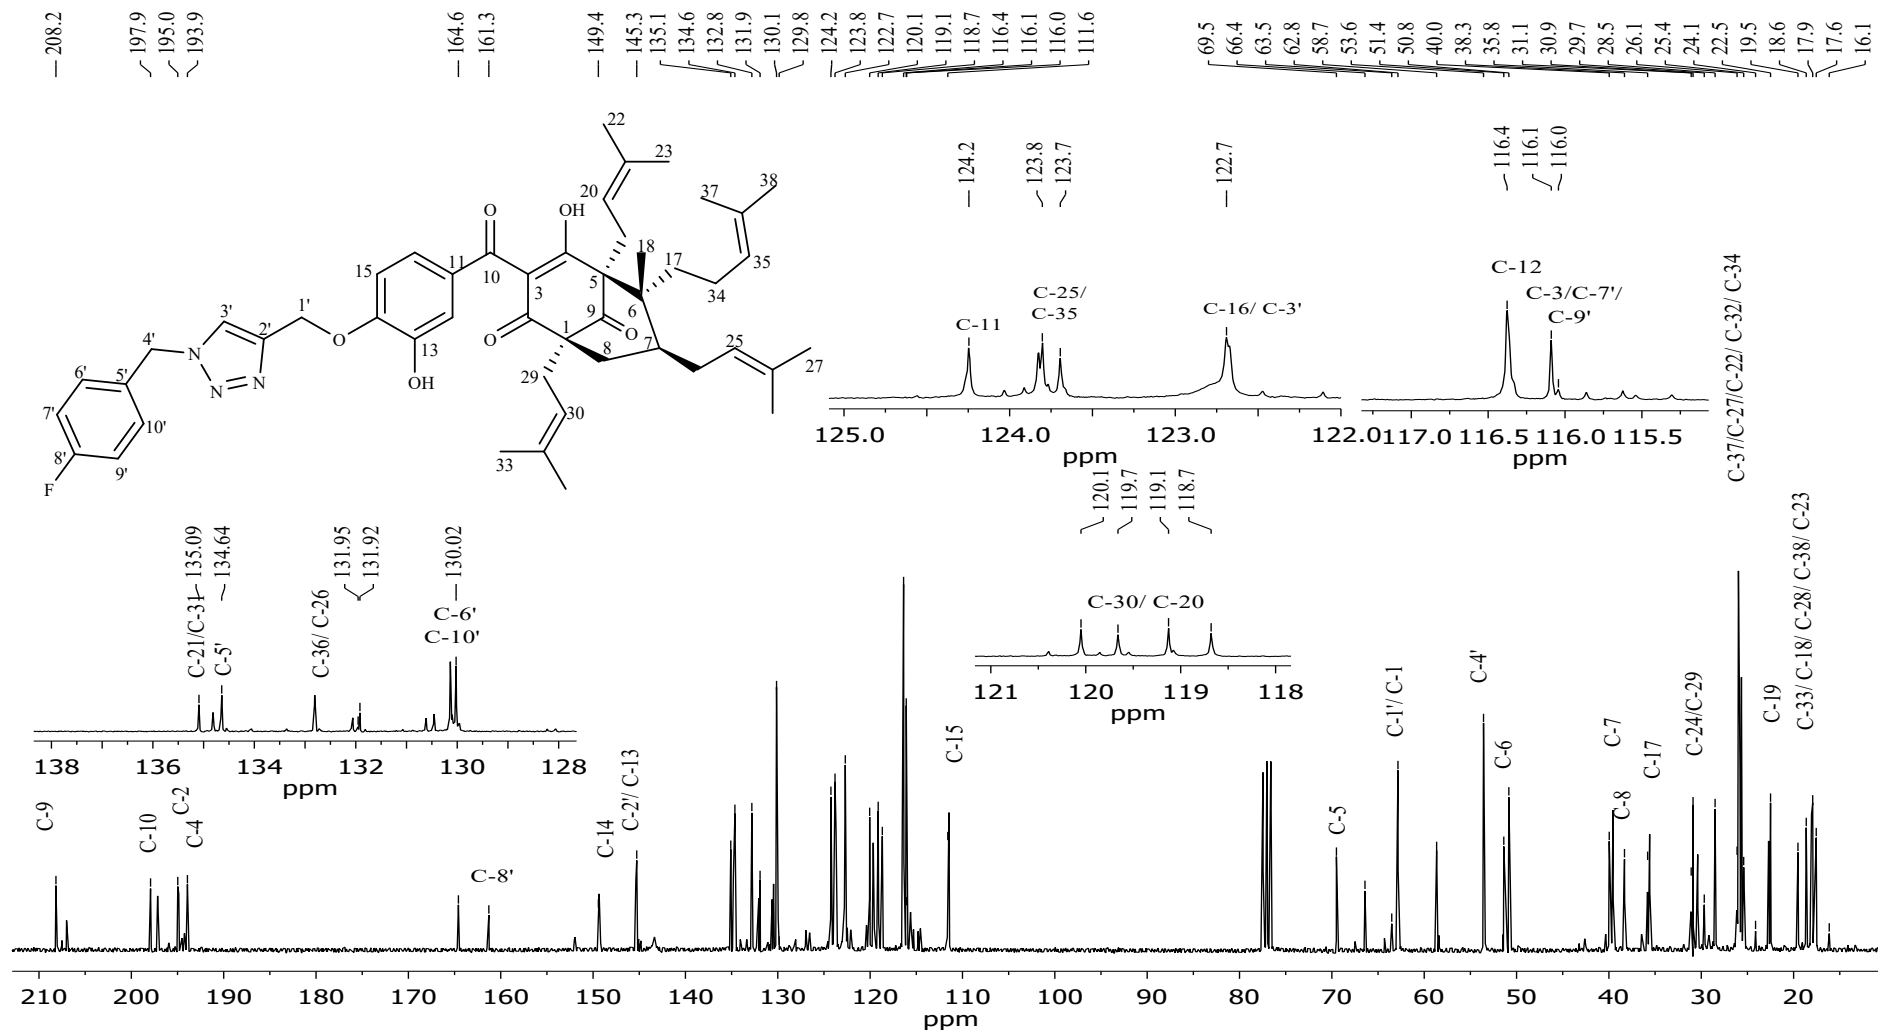

Fig. S49.  $^{13}\text{C}$  NMR spectrum (75 MHz,  $\text{CDCl}_3$ ) of compound 12.

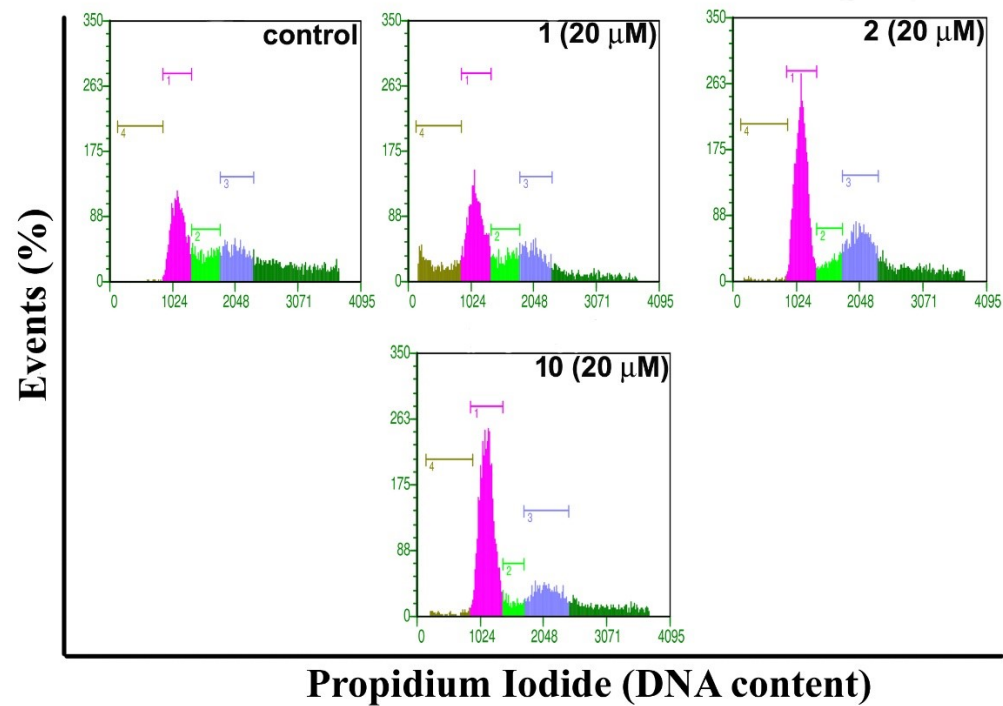

**Fig. S50.** Representative histograms showing DNA quantification performed by flow cytometry. HepG2 cells were treated for 48 h with guttiferone-A (**1**), alkyne (**2**), and compound **10** at 20  $\mu$ M Sub-G1 (brown), G0/G1 (pink), S (green), G2/M (blue), hypertetraploid population (dark green).

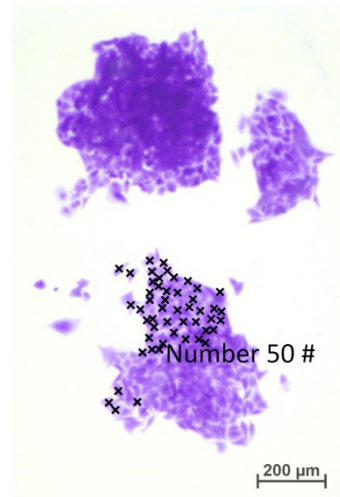

Fig. S51. Illustrative image evidencing the morphological features of the colonies visualized in a stereomicroscope. The software Zen Lite Zeiss 3.7 was used to select appropriately the colonies with, at least, 50 cells.

**Table S1.** Information of primers used for amplification in real-time PCR.

| Gene          | Sequence                         | Reference      |
|---------------|----------------------------------|----------------|
| <i>CDKN1A</i> | F 5'- CCATAGCCTCTACTGCCACCATC-3' | NM_001291549.1 |
|               | R 5'- GTCCAGCGACCTTCCTCATCCA-3'  |                |
| <i>CCND1</i>  | F 5'- GGGTTGTGCTACAGATGATAGAG-3' | NM_053056.2    |
|               | R 5'- AGACGCCTCCTTTGTGTTAAT-3'   |                |

|                |                                                                   |                |
|----------------|-------------------------------------------------------------------|----------------|
| <i>CCNE2</i>   | F 5'- GGCTATGCTGGAGGAAGTAAAT-3'<br>R 5'- GCTCTTCGGTGGTGTCATAAT-3' | NM_057749.2    |
| <i>CDC25</i>   | F 5'- TTTTCCAAGGTATGTGCGCTG-3'<br>R 5'- TGGAACCTCCCCGACAGTAAGG-3' | XM_006714739.3 |
| <i>CDK1</i>    | F 5'- ATGAGGTAGTAACACTCTGG-3'<br>R 5'- CCTATACTCCAAATGTCAACTG-3'  | NM_001786.4    |
| <i>CNNB1</i>   | F 5'- GTACCCTCCAGAAATTGGTGA-3'<br>R 5'- GACTACATTCTTAGCCAGGTG-3'  | NM_031966.2    |
| <i>ACTB</i>    | F 5'- AGAGCTACGAGCTGCCTGAC-3'<br>R 5'- AGCACTGTGTTGGCGTACAG-3'    | NM_001101.3    |
| <i>GAPDH</i>   | F 5'- GGATTTGGTCGTATTGGGC-3'<br>R 5'- TGGAAGATGGTGATGGGATT-3'     | NM_002046.4    |
| <i>18srRNA</i> | F 5'- GTAACCCGTTGAACCCCAT-3'<br>R 5'- CCATCCAATCGGTAGTAGCG-3'     | HQ387008.1     |

---

F = forward primer; R = reverse primer

Table S2: Specification of the antibody used in Western blotting

| <b>Antibody</b>                 | <b>Dilution</b> | <b>Manufacture</b> |
|---------------------------------|-----------------|--------------------|
| <b>Anti-phosfo-ERK (Tyr204)</b> | 1:100           | Santa Cruz         |
| <b>Anti-ERK1/2</b>              | 1:200           | Cell signaling     |
| <b>Anti-Cyclin D1</b>           | 1:200           | Santa Cruz         |

|                                          |        |                |
|------------------------------------------|--------|----------------|
| <b>Anti-Cyclin E2</b>                    | 1:200  | Santa Cruz     |
| <b>Anti-<math>\alpha</math>-tubulin</b>  | 1:100  | Sigma          |
| <b>Anti-rabbit peroxidase-conjugated</b> | 1:2000 | Cell signaling |

---

Table S3. Raw data from clonogenic assay

|                    | <b>Number of colonies (% colonies)</b> |                                  |
|--------------------|----------------------------------------|----------------------------------|
|                    | <b>Control</b>                         | <b>10 (20 <math>\mu</math>M)</b> |
| <b>Replicate 1</b> | 375 (98.08 %)                          | 250 (65.39 %)                    |
| <b>Replicate 2</b> | 390 (102.00 %)                         | 263 (68.79 %)                    |
| <b>Replicate 3</b> | 382 (99.91 %)                          | 269 (70.35 %)                    |
